# Supplementary material for: Dinuclear zinc-catalyzed enantioselective formal [3 + 2] cycloaddition of N-2,2,2-trifluoroethylisatin ketimines with low reactivity aurone derivatives
Source: Royal Society of Chemistry journal article supplement (doi:10.1039/d1ob01599k), 2021-01-01

## Supporting Information for

### Dinuclear zinc-catalyzed enantioselective formal [3+2] cycloaddition of *N*-2,2,2-trifluoroethylisatin ketimines with low reactive aurone derivatives

Rui-Li Wang, Shi-Kun Jia,\* Ya-Jun Guo, Yang Yi, Yuan-Zhao Hua,\* Hui-Jie Lu,  
Min-Can Wang\*

Green Catalysis Center, and College of Chemistry, Zhengzhou University, Zhengzhou 450001,  
China.

## Contents

|                                                |     |
|------------------------------------------------|-----|
| 1. General Information.....                    | S2  |
| 2. Characterization of <b>3</b> .....          | S3  |
| 3. Derivatization of product <b>3aa</b> .....  | S16 |
| 4. References.....                             | S16 |
| 5. X-ray crystal structure of <b>3af</b> ..... | S17 |
| 6. NMR Spectra of Compounds.....               | S19 |
| 7. HPLC spectra of compounds .....             | S62 |

## General Information

All the dry solvents were treated prior to use according to the standard methods. Unless otherwise noted, all sensitive to air or moisture reactions were carried out under nitrogen using standard Schlenk and vacuum line techniques. Diethylzinc (1.0 mol/L in hexane) was purchased from Aldrich and used as received. The melting point (m. p.) was determined on an electrothermal digital melting point apparatus and uncorrected. Optical rotation values were measured with instruments operating at  $\lambda = 589$  nm, corresponding to the sodium D line at 20 °C. Enantiomeric excesses values were determined with HPLC (chiral column; mobile phase hexane/*i*-PrOH). NMR spectra were recorded on NMR spectrometer with CDCl<sub>3</sub> or DMSO-*d*<sub>6</sub> as the solvents, and TMS as an internal standard (400 MHz for <sup>1</sup>H, 100 MHz for <sup>13</sup>C). Infrared (IR) spectra were recorded by using Ft-IR spectrometer ( $\nu$  in cm<sup>-1</sup>). HRMS was determined on a Q-TOF Micro LC/MS System ESI spectrometer. Chiral ligands **L1–L5**,<sup>1</sup> **L6–L8**,<sup>2</sup> **L9**,<sup>3</sup> compounds **1**,<sup>4</sup> and **2**<sup>5</sup> were synthesized according to the literature.

### General procedures for the catalytic reaction

In a flame-dried Schlenk tube, a solution of diethylzinc (0.04 mL, 1.0 mol/L in hexane, 0.04 mmol) was added to a solution of the chiral ligand **L1** (0.02 mmol) in dry toluene (1.0 mL) under nitrogen at 10 °C. The mixture was stirred for 30 min. Then compound **2** (0.2 mmol) was added and stirred for another 5 min. Substrate **1** (0.2 mmol) was dissolved in 1.0 mL toluene and added dropwise to the mixture by a peristaltic injection pump over 30 min at 10 °C. The mixture was stirred at 10 °C for the necessary time to complete the reaction (detected by TLC). Finally, the solution was diluted with saturated solution of Na<sub>2</sub>CO<sub>3</sub> and extracted with toluene (3 x 10 mL). The combined organic layer was dried over MgSO<sub>4</sub> and concentrated in vacuo. The residue was purified by flash column chromatography on silica gel to give products **3**.

## Characterization of 3

(2*S*,2'*S*,4'*S*,5'*R*)-4'-phenyl-5'-(trifluoromethyl)-3*H*-dispiro[benzofuran-2,3'-pyrrolidine-2',3''-indoline]-2'',3-dione (**3aa**):

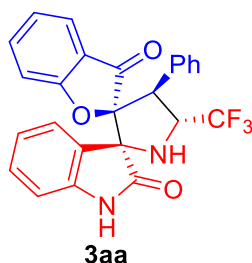

Compound **3aa** was purified by flash chromatography (petroleum ether/EtOAc = 3/1) to afford a yellow solid in 90% yield (81mg, >20:1 dr): 95% *ee*;  $[\alpha]_{\text{D}}^{20} = +139$  (c 1.0, in THF);  $^1\text{H NMR}$  (400 MHz, DMSO-*d*<sub>6</sub>)  $\delta$  10.42 (s, 1H), 7.59–7.46 (m, 2H), 7.36–7.27 (m, 2H), 7.26–6.99 (m, 6H), 6.89–6.72 (m, 2H), 6.71–6.60 (m, 1H), 4.96–4.77 (m, 2H), 4.77–4.68 (m, 1H);  $^{13}\text{C NMR}$  (101 MHz, DMSO-*d*<sub>6</sub>)  $\delta$  194.8, 175.2, 170.4, 142.8, 139.5, 132.4, 130.7, 129.4, 128.8, 128.5, 127.6, 125.4 (q,  $J = 280.2$  Hz), 123.9, 122.7, 121.6, 121.5, 113.3, 109.7, 98.1, 72.8, 61.9 (q,  $J = 29.5$  Hz), 50.7;  $^{19}\text{F NMR}$  (376 MHz, DMSO-*d*<sub>6</sub>)  $\delta$  -71.51; **IR** (neat): 2989, 2971, 1728, 1610, 1462, 753, 679  $\text{cm}^{-1}$ ; **HRMS** (ESI):  $m/z$  for  $[\text{M}+\text{H}]^+$ : calcd 451.1264, found 451.1265; **HPLC**: Daicel Chiralpak IA, *n*-hexane/*i*-PrOH = 60/40, flow rate = 1 mL/min,  $\lambda = 254$  nm,  $t_{\text{major}} = 14.84$  min and  $t_{\text{minor}} = 10.46$  min.

(2*S*,2'*S*,4'*S*,5'*R*)-4'-(4-methoxyphenyl)-5'-(trifluoromethyl)-3*H*-dispiro[benzofuran-2,3'-pyrrolidine-2',3''-indoline]-2'',3-dione (**3ab**):

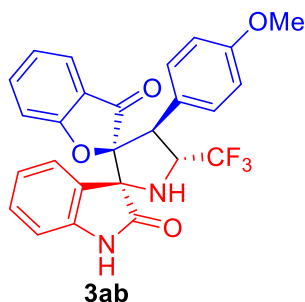

Compound **3ab** was purified by flash chromatography (petroleum ether/EtOAc = 3/1) to afford a yellow solid in 95% yield (91 mg, >20:1 dr): 97% *ee*;  $[\alpha]_{\text{D}}^{20} = +134$  (c 1.0, in THF);  $^1\text{H NMR}$  (400 MHz,  $\text{CDCl}_3$ )  $\delta$  8.43–8.33 (m, 1H), 7.43 (d,  $J = 7.5$  Hz, 1H), 7.37–7.29 (m, 1H), 7.27–7.20 (m, 2H), 7.16 (s, 1H), 7.05–6.99 (m, 1H), 6.95 (d,  $J = 8.4$  Hz, 1H), 6.77 (m, 1H), 6.73–6.65 (m, 2H), 6.60 (d,  $J = 8.8$  Hz, 2H), 4.97 (d,  $J = 10.9$  Hz, 1H), 4.76–4.51 (m, 1H), 3.58 (s, 3H), 2.84 (d,  $J = 7.1$  Hz, 1H);  $^{13}\text{C NMR}$  (101 MHz,  $\text{CDCl}_3$ )  $\delta$  194.6, 175.8, 170.2, 159.2, 141.7, 138.4, 130.5, 130.3, 126.1, 125.65 (q,  $J = 280.0$  Hz), 124.3, 124.1, 123.3, 122.3, 122.1, 121.7, 113.7, 112.3, 110.3, 97.7, 72.4, 62.6 (q,  $J = 30.6$  Hz), 55.0, 50.2;  $^{19}\text{F NMR}$  (376 MHz,  $\text{CDCl}_3$ )  $\delta$  -73.17; **IR** (neat): 3299, 2988, 1724, 1694, 1514, 1474, 1055, 761, 595  $\text{cm}^{-1}$ ; **HRMS** (ESI):  $m/z$  for  $[\text{M}+\text{H}]^+$ : calcd 481.1370, found 481.1370; **HPLC**: Daicel Chiralpak IA, *n*-hexane/*i*-PrOH = 60/40, flow rate = 1 mL/min,  $\lambda = 254$  nm,  $t_{\text{major}} = 27.82$  min and  $t_{\text{minor}} = 17.01$  min.

(2S,2'S,4'S,5'R)-4'-(p-tolyl)-5'-(trifluoromethyl)-3H-dispiro[benzofuran-2,3'-pyrrolidine-2',3''-indoline]-2'',3-dione (**3ac**):

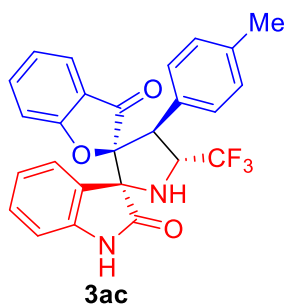

Compound **3ac** was purified by flash chromatography (petroleum ether/EtOAc = 3/1) to afford a yellow solid in 90% yield (84 mg, >20:1 dr): 94% *ee*;  $[\alpha]_D^{20} = +184$  (c 1.0, in THF);  $^1\text{H NMR}$  (400 MHz, DMSO- $d_6$ )  $\delta$  10.60–10.15 (m, 1H), 7.60–7.47 (m, 2H), 7.25–7.15 (m, 4H), 7.10–6.92 (m, 3H), 6.64 (d,  $J = 7.7$  Hz, 1H), 4.92–4.73 (m, 2H), 4.69 (d,  $J = 8.9$  Hz, 1H), 2.13 (s, 3H);  $^{13}\text{C NMR}$  (101 MHz, DMSO- $d_6$ )  $\delta$  194.3, 174.7, 169.9, 142.3, 138.9, 137.1, 130.1, 128.9, 128.8, 127.1, 126.1 (q,  $J = 280.2$  Hz), 123.5, 123.4, 122.2, 121.0, 112.8, 109.2, 97.6, 72.4, 61.6 (q,  $J = 29.9$  Hz), 49.8, 20.5;  $^{19}\text{F NMR}$  (376 MHz, DMSO- $d_6$ )  $\delta$  -71.45; **HRMS** (ESI):  $m/z$  for  $[\text{M}+\text{H}]^+$ : calcd 465.1421, found 465.1423; **IR** (neat): 3301, 2972, 2900, 1279, 1635, 1454, 1055, 751, 622  $\text{cm}^{-1}$ ; **HPLC**: Daicel Chiralpak IF, *n*-hexane/*i*-PrOH = 60/40, flow rate = 1 mL/min,  $\lambda = 254$  nm,  $t_{\text{major}} = 27.20$  min and  $t_{\text{minor}} = 14.80$  min.

(2S,2'S,4'S,5'R)-4'-(4-fluorophenyl)-5'-(trifluoromethyl)-3H-dispiro[benzofuran-2,3'-pyrrolidine-2',3''-indoline]-2'',3-dione (**3ad**):

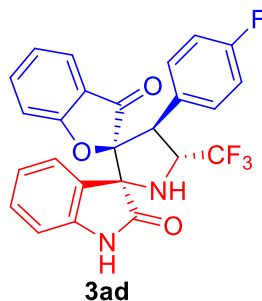

Compound **3ad** was purified by flash chromatography (petroleum ether/EtOAc = 3/1) to afford a yellow solid in 92% yield (86 mg, >20:1 dr): 96% *ee*;  $[\alpha]_D^{20} = +159$  (c 1.0, in THF);  $^1\text{H NMR}$  (400 MHz,  $\text{CDCl}_3$ )  $\delta$  8.78 (s, 1H), 7.54 (d,  $J = 7.5$  Hz, 1H), 7.47–7.33 (m, 3H), 7.26 (s, 1H), 7.15–7.09 (m, 1H), 7.05 (d,  $J = 8.4$  Hz, 1H), 6.91–6.73 (m, 5H), 5.12 (d,  $J = 10.9$  Hz, 1H), 4.85–4.66 (m, 1H), 3.00 (d,  $J = 8.2$  Hz, 1H);  $^{13}\text{C NMR}$  (101 MHz,  $\text{CDCl}_3$ )  $\delta$  194.3, 175.9, 170.1, 162.42 (d,  $J = 247.1$  Hz), 141.8, 138.6, 130.9, 130.8, 130.7, 127.3 (d,  $J = 3.3$  Hz), 126.1,  $\delta$  125.6 (q,  $J = 280.0$  Hz), 124.4, 123.9, 122.4, 122.3, 121.6, 115.5, 115.2, 112.3, 110.5, 97.5, 72.5, 62.6 (q,  $J = 30.8$  Hz), 50.2;  $^{19}\text{F NMR}$  (376 MHz,  $\text{CDCl}_3$ )  $\delta$  -73.19, -113.82; **IR** (neat): 2988, 2972, 1732, 1609, 1152, 1463, 1056, 751, 679  $\text{cm}^{-1}$ ; **HRMS** (ESI):  $m/z$  for  $[\text{M}+\text{H}]^+$ : calcd 469.1170, found 469.1171; **HPLC**: Daicel Chiralpak IA, *n*-hexane/*i*-PrOH = 60/40, flow rate = 1 mL/min,  $\lambda = 254$  nm,  $t_{\text{major}} = 13.45$  min and  $t_{\text{minor}} = 11.83$  min.

(2S,2'S,4'S,5'R)-4'-(4-chlorophenyl)-5'-(trifluoromethyl)-3H-dispiro[benzofuran-2,3'-pyrrolidine-2',3''-indoline]-2'',3-dione (**3ae**):

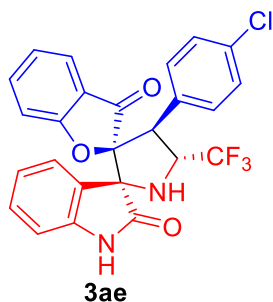

Compound **3ae** was purified by flash chromatography (petroleum ether/EtOAc = 3/1) to afford a yellow solid in 92% yield (89 mg, >20:1 dr): 94% *ee*;  $[\alpha]_{\text{D}}^{20} = +169$  (c 1.0, in THF); **<sup>1</sup>H NMR** (400 MHz, CDCl<sub>3</sub>)  $\delta$  8.49 (s, 1H), 7.54–7.41 (m, 2H), 7.38–7.29 (m, 3H), 7.18–7.09 (m, 3H), 7.05 (d, *J* = 8.4 Hz, 1H), 6.91–6.65 (m, 3H), 5.10 (d, *J* = 10.9 Hz, 1H), 4.88–4.63 (m, 1H), 2.96 (d, *J* = 8.2 Hz, 1H); **<sup>13</sup>C NMR** (101 MHz, CDCl<sub>3</sub>)  $\delta$  194.1, 175.6, 170.1, 141.6, 138.7, 134.1, 130.7, 130.6, 130.1, 128.6, 126.1, 125.5 (q, *J* = 280.2 Hz), 124.4, 123.8, 122.4, 121.6, 112.3, 110.5, 97.4, 72.5, 62.5 (q, *J* = 30.7 Hz), 50.1; **<sup>19</sup>F NMR** (376 MHz, CDCl<sub>3</sub>)  $\delta$  -73.24; **IR** (neat): 3344, 2988, 1733, 1615, 1474, 1132, 752, 678 cm<sup>-1</sup>; **HRMS** (ESI): *m/z* for [M+H]<sup>+</sup>: calcd 485.0874, found 485.0877; **HPLC**: Daicel Chiralpak IA, *n*-hexane/*i*-PrOH = 60/40, flow rate = 1 mL/min,  $\lambda$  = 254 nm, *t*<sub>major</sub> = 18.00 min and *t*<sub>minor</sub> = 11.73 min.

**(2S,2'S,4'S,5'R)-4'-(4-bromophenyl)-5'-(trifluoromethyl)-3H-dispiro[benzofuran-2,3'-pyrrolidine-2',3''-indoline]-2'',3-dione (3af):**

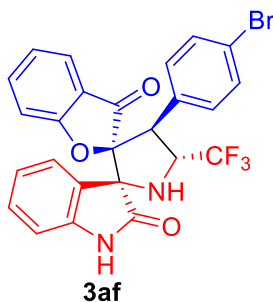

Compound **3af** was purified by flash chromatography (petroleum ether/EtOAc = 3/1) to afford a yellow solid in 93% yield (98 mg, >20:1 dr): 94% *ee*;  $[\alpha]_{\text{D}}^{20} = +118$  (c 1.0, in THF); **<sup>1</sup>H NMR** (400 MHz, CDCl<sub>3</sub>)  $\delta$  8.66 (s, 1H), 7.56–7.34 (m, 2H), 7.34–7.29 (m, 3H), 7.29–7.22 (m, 2H), 7.17–7.09 (m, 1H), 7.05 (d, *J* = 8.4 Hz, 1H), 6.91–6.73 (m, 3H), 5.09 (d, *J* = 10.9 Hz, 1H), 4.86–4.68 (m, 1H), 2.98 (d, *J* = 8.3 Hz, 1H); **<sup>13</sup>C NMR** (101 MHz, CDCl<sub>3</sub>)  $\delta$  194.1, 175.8, 170.1, 141.7, 138.7, 131.5, 130.9, 130.7, 130.6, 126.1, 125.5 (q, *J* = 280.2 Hz), 124.5, 123.8, 122.5, 122.4, 122.3, 121.6, 112.3, 110.5, 97.3, 72.57, 62.5 (q, *J* = 30.9 Hz), 50.2; **<sup>19</sup>F NMR** (376 MHz, CDCl<sub>3</sub>)  $\delta$  -73.21; **IR** (neat): 2988, 2972, 1131, 1514, 1473, 1074, 751, 678 cm<sup>-1</sup>; **HRMS** (ESI): *m/z* for [M+H]<sup>+</sup>: calcd 529.0369, found 529.0373; **HPLC**: Daicel Chiralpak IA, *n*-hexane/*i*-PrOH = 60/40, flow rate = 1 mL/min,  $\lambda$  = 254 nm, *t*<sub>major</sub> = 21.09 min and *t*<sub>minor</sub> = 12.48 min.

**(2S,2'S,4'S,5'R)-4'-(3-methoxyphenyl)-5'-(trifluoromethyl)-3H-dispiro[benzofuran-2,3'-pyrrolidine-2',3''-indoline]-2'',3-dione (3ag):**

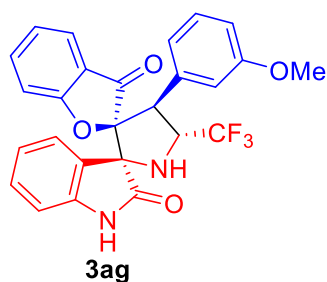

Compound **3ag** was purified by flash chromatography (petroleum ether/EtOAc = 3/1) to afford a yellow solid in 80% yield (77 mg, >20:1 dr): 91% *ee*;  $[\alpha]_{\text{D}}^{20} = +132$  (c 1.0, in THF); **<sup>1</sup>H NMR** (400 MHz, DMSO-*d*<sub>6</sub>)  $\delta$  10.41 (s, 1H), 7.57 – 7.50 (m, 2H), 7.28 – 7.20 (m, 2H), 7.14 – 7.04 (m, 2H), 6.90 – 6.82 (m, 3H), 6.79 (t, *J* = 7.4 Hz, 1H), 6.73 – 6.69 (m, 1H), 6.65 (d, *J* = 7.7 Hz, 1H), 4.90 – 4.73 (m, 2H), 4.69 (d, *J* = 8.6 Hz, 1H), 3.65 (s, 3H); **<sup>13</sup>C NMR** (101 MHz, DMSO-*d*<sub>6</sub>)  $\delta$  194.7, 175.2, 170.4, 159.3, 142.8, 139.5, 134.0, 130.7, 129.8, 127.6, 126.6 (q, *J* = 280.2 Hz), 124.0, 123.9, 122.8, 121.8, 121.6, 121.5, 114.9, 113.8, 113.3, 109.7, 98.0, 72.8, 62.1 (q, *J* = 29.8 Hz), 55.4, 50.6; **<sup>19</sup>F NMR** (376 MHz, DMSO-*d*<sub>6</sub>)  $\delta$  -71.53; **IR** (neat): 3293, 2989, 1724, 1694, 1514, 1474, 1055, 761, 595  $\text{cm}^{-1}$ ; **HRMS** (ESI): *m/z* for  $[\text{M}+\text{H}]^+$ : calcd 481.1370, found 481.1373; **HPLC**: Daicel Chiralpak IF, *n*-hexane/*i*-PrOH = 60/40, flow rate = 1 mL/min,  $\lambda$  = 254 nm,  $t_{\text{major}}$  = 43.8 min and  $t_{\text{minor}}$  = 21.5 min.

**(2*S*,2'*S*,4'*S*,5'*R*)-4'-(*m*-tolyl)-5'-(trifluoromethyl)-3H-dispiro[benzofuran-2,3'-pyrrolidine-2',3''-indoline]-2'',3-dione (3ah):**

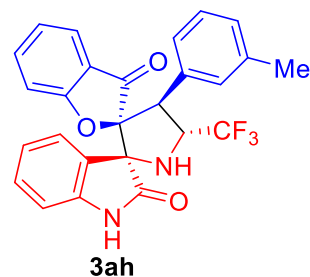

Compound **3ah** was purified by flash chromatography (petroleum ether/EtOAc = 3/1) to afford a yellow solid in 82% yield (77 mg, >20:1 dr): 95% *ee*;  $[\alpha]_{\text{D}}^{20} = +137$  (c 1.0, in THF); **<sup>1</sup>H NMR** (400 MHz,  $\text{CDCl}_3$ )  $\delta$  8.58 (s, 1H), 7.44 (d, *J* = 7.5 Hz, 1H), 7.35–7.26 (m, 1H), 7.17–7.08 (m, 3H), 7.05–6.99 (m, 1H), 6.97–6.92 (m, 2H), 6.86–6.60 (m, 4H), 4.98 (d, *J* = 10.9 Hz, 1H), 4.79–4.67 (m, 1H), 2.87 (d, *J* = 7.5 Hz, 1H), 2.11 (s, 3H); **<sup>13</sup>C NMR** (101 MHz,  $\text{CDCl}_3$ )  $\delta$  194.5, 175.9, 170.2, 141.8, 138.3, 137.8, 131.3, 130.6, 130.2, 128.8, 128.1, 126.2, 126.1, 125.7 (q, *J* = 279.9 Hz), 124.3, 124.1, 122.3, 122.1, 121.7, 112.3, 110.4, 97.7, 72.5, 62.5 (q, *J* = 30.7 Hz), 50.9, 21.3; **IR** (neat): 2988, 2901, 1732, 1609, 1463, 1066, 751, 641  $\text{cm}^{-1}$ ; **<sup>19</sup>F NMR** (376 MHz,  $\text{CDCl}_3$ )  $\delta$  -73.13. **HRMS** (ESI): *m/z* for  $[\text{M}+\text{H}]^+$ : calcd 465.1421, found 465.1425; **HPLC**: Daicel Chiralpak IA, *n*-hexane/*i*-PrOH = 60/40, flow rate = 1 mL/min,  $\lambda$  = 254 nm,  $t_{\text{major}}$  = 16.60 min and  $t_{\text{minor}}$  = 11.31 min.

**(2*S*,2'*S*,4'*S*,5'*R*)-4'-(3-chlorophenyl)-5'-(trifluoromethyl)-3H-dispiro[benzofuran-2,3'-pyrrolidine-2',3''-indoline]-2'',3-dione (3ai):**

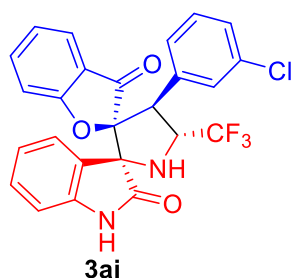

Compound **3ai** was purified by flash chromatography (petroleum ether/EtOAc = 3/1) to afford a yellow solid in 78% yield (76 mg, >20:1 dr): 91% *ee*;  $[\alpha]_D^{20} = +97$  (c 1.0, in THF);  $^1\text{H NMR}$  (400 MHz, DMSO- $d_6$ )  $\delta$  10.44 (s, 1H), 7.61–7.50 (m, 2H), 7.39 (s, 1H), 7.30–7.16 (m, 5H), 7.13–7.03 (m, 1H), 6.84 (m, 2H), 6.66 (d,  $J = 7.7$  Hz, 1H), 4.94–4.80 (m, 2H), 4.74 (d,  $J = 8.1$  Hz, 1H);  $^{13}\text{C NMR}$  (101 MHz, DMSO- $d_6$ )  $\delta$  194.0, 174.6, 169.8, 142.4, 139.2, 134.4, 132.8, 130.2, 130.2, 128.53, 128.1, 127.8, 127.1, 126.8 (q,  $J = 280.2$  Hz), 123.6, 123.3, 122.5, 121.1, 120.9, 112.7, 109.3, 97.3, 72.3, 61.5 (q,  $J = 29.7$  Hz), 49.8;  $^{19}\text{F NMR}$  (376 MHz, DMSO- $d_6$ )  $\delta$  -71.61; **IR** (neat): 3301, 2988, 1724, 1694, 1514, 1474, 1055, 761, 595  $\text{cm}^{-1}$ ; **HRMS** (ESI):  $m/z$  for  $[\text{M}+\text{H}]^+$ : calcd 485.0874, found 485.0874; **HPLC**: Daicel Chiralpak IF, *n*-hexane/*i*-PrOH = 60/40, flow rate = 1 mL/min,  $\lambda = 254$  nm,  $t_{\text{major}} = 22.62$  min and  $t_{\text{minor}} = 16.53$  min.

**(2S,2'S,4'S,5'R)-4'-(2-methoxyphenyl)-5'-(trifluoromethyl)-3H-dispiro[benzofuran-2,3'-pyrrolidine-2'',3''-indoline]-2'',3-dione (3aj):**

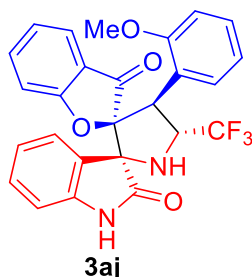

Compound **3aj** was purified by flash chromatography (petroleum ether/EtOAc = 3/1) to afford a yellow solid in 96% yield (93 mg, >20:1 dr): 98% *ee*;  $[\alpha]_D^{20} = +162$  (c 1.0, in THF);  $^1\text{H NMR}$  (400 MHz, DMSO- $d_6$ )  $\delta$  10.31 (s, 1H), 7.63–7.41 (m, 3H), 7.27–7.12 (m, 2H), 7.09–7.00 (m, 2H), 6.88–6.72 (m, 4H), 6.69–6.54 (m, 1H), 5.60 (d,  $J = 10.6$  Hz, 1H), 4.89–4.53 (m, 2H), 3.41 (s, 3H);  $^{13}\text{C NMR}$  (101 MHz, DMSO- $d_6$ )  $\delta$  194.1, 175.2, 169.9, 157.9, 143.0, 139.0, 130.5, 130.0, 129.3, 127.6, 126.7 (q,  $J = 280.2$  Hz), 124.3, 123.8, 122.5, 121.7, 121.4, 120.9, 120.4, 113.1, 111.8, 109.6, 98.1, 72.9, 62.6 (q,  $J = 29.3$  Hz), 56.2, 42.4;  $^{19}\text{F NMR}$  (376 MHz, DMSO- $d_6$ )  $\delta$  -71.60; **IR** (neat): 2988, 2972, 1733, 1541, 1464, 1117, 753, 618  $\text{cm}^{-1}$ ; **HRMS** (ESI):  $m/z$  for  $[\text{M}+\text{H}]^+$ : calcd 481.1370, found 481.1372; **HPLC**: Daicel Chiralpak IA, *n*-hexane/*i*-PrOH = 60/40, flow rate = 1 mL/min,  $\lambda = 254$  nm,  $t_{\text{major}} = 11.67$  min and  $t_{\text{minor}} = 14.83$  min.

**(2S,2'S,4'S,5'R)-4'-(o-tolyl)-5'-(trifluoromethyl)-3H-dispiro[benzofuran-2,3'-pyrrolidine-2'',3''-indoline]-2'',3-dione (3ak):**

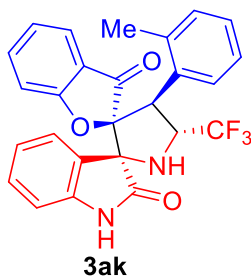

Compound **3ak** was purified by flash chromatography (petroleum ether/EtOAc = 3/1) to afford a yellow solid in 85% yield (79 mg, >20:1 dr): 93% *ee*;  $[\alpha]_{\text{D}}^{20} = +108$  (c 1.0, in THF); **<sup>1</sup>H NMR** (400 MHz, DMSO-*d*<sub>6</sub>)  $\delta$  10.40 (s, 1H), 7.68–7.45 (m, 3H), 7.35–7.16 (m, 2H), 7.14–6.93 (m, 4H), 6.89–6.73 (m, 2H), 6.69–6.59 (m, 1H), 5.53 (d, *J* = 10.3 Hz, 1H), 4.89–4.42 (m, 2H), 2.31 (s, 3H); **<sup>13</sup>C NMR** (101 MHz, DMSO-*d*<sub>6</sub>)  $\delta$  195.0, 175.2, 170.4, 142.9, 139.6, 137.4, 131.1, 130.9, 130.7, 128.9, 128.0, 127.6, 126.7 (q, *J* = 279.9 Hz), 126.1, 124.1, 124.0, 122.7, 121.6, 121.4, 113.3, 109.8, 98.3, 73.0, 63.3 (q, *J* = 29.3 Hz), 44.5, 20.0; **<sup>19</sup>F NMR** (376 MHz, DMSO-*d*<sub>6</sub>)  $\delta$  -71.78; **IR** (neat): 2989, 2972, 1728, 1511, 1463, 1130, 751, 637  $\text{cm}^{-1}$ ; **HRMS** (ESI): *m/z* for  $[\text{M}+\text{H}]^+$ : calcd 465.1421, found 465.1423; **HPLC**: Daicel Chiralpak IA, *n*-hexane/*i*-PrOH = 60/40, flow rate = 1 mL/min,  $\lambda$  = 254 nm,  $t_{\text{major}}$  = 8.83 min and  $t_{\text{minor}}$  = 11.87 min.

**(2*S*,2'*S*,4'*S*,5'*R*)-4'-(2-chlorophenyl)-5'-(trifluoromethyl)-3H-dispiro[benzofuran-2,3'-pyrrolidine-2',3''-indoline]-2'',3-dione (3al):**

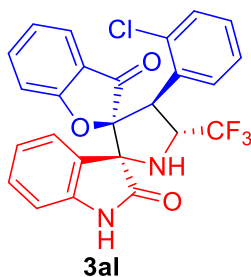

Compound **3al** was purified by flash chromatography (petroleum ether/EtOAc = 3/1) to afford a yellow solid in 90% yield (87 mg, >20:1 dr): 99% *ee*;  $[\alpha]_{\text{D}}^{20} = +169$  (c 1.0, in THF); **<sup>1</sup>H NMR** (400 MHz, DMSO-*d*<sub>6</sub>)  $\delta$  10.39 (s, 1H), 7.84 – 7.78 (m, 1H), 7.62 – 7.54 (m, 2H), 7.34 – 7.27 (m, 2H), 7.26 – 7.21 (m, 2H), 7.21 – 7.04 (m, 3H), 6.89 – 6.77 (m, 2H), 6.67 (d, *J* = 7.7 Hz, 1H), 5.85 (d, *J* = 10.4 Hz, 1H), 4.82 – 4.63 (m, 2H); **<sup>13</sup>C NMR** (101 MHz, DMSO-*d*<sub>6</sub>)  $\delta$  193.2, 174.5, 169.5, 142.5, 139.0, 133.9, 130.6, 130.2, 130.1, 129.5, 127.1, 126.8, 126.0 (q, *J* = 278.2 Hz), 123.6, 123.3, 122.4, 121.0, 120.9, 112.8, 109.3, 97.2, 72.6, 63.1 (q, *J* = 29.3 Hz), 44.7; **<sup>19</sup>F NMR** (376 MHz, DMSO-*d*<sub>6</sub>)  $\delta$  -71.83; **IR** (neat): 2988, 2969, 1731, 1613, 1473, 1055, 748, 560  $\text{cm}^{-1}$ ; **HRMS** (ESI): *m/z* for  $[\text{M}+\text{H}]^+$ : calcd 485.0874, found 485.0874; **HPLC**: Daicel Chiralpak IA, *n*-hexane/*i*-PrOH = 60/40, flow rate = 1 mL/min,  $\lambda$  = 254 nm,  $t_{\text{major}}$  = 12.34 min and  $t_{\text{minor}}$  = 15.48 min.

**(2*S*,2'*S*,4'*S*,5'*R*)-4'-(2-bromophenyl)-5'-(trifluoromethyl)-3H-dispiro[benzofuran-2,3'-pyrrolidine-2',3''-indoline]-2'',3-dione (3am):**



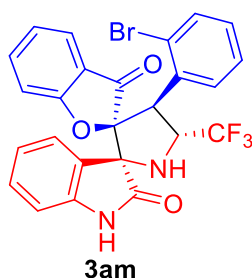

Compound **3am** was purified by flash chromatography (petroleum ether/EtOAc = 3/1) to afford a yellow solid in 90% yield (95 mg, >20:1 dr): 99% *ee*;  $[\alpha]_D^{20} = +65$  (c 1.0, in THF); **<sup>1</sup>H NMR** (400 MHz, DMSO-*d*<sub>6</sub>)  $\delta$  10.36 (s, 1H), 7.90–7.76 (m, 1H), 7.71–7.42 (m, 3H), 7.38–7.00 (m, 5H), 6.95–6.56 (m, 3H), 5.86 (d, *J* = 9.5 Hz, 1H), 4.94–4.45 (m, 2H); **<sup>13</sup>C NMR** (101 MHz, DMSO-*d*<sub>6</sub>)  $\delta$  193.6, 174.9, 170.0, 143.0, 139.5, 133.4, 132.4, 131.2, 130.7, 130.3, 127.8, 127.6, 126.50 (q, *J* = 278.8 Hz), 125.5, 124.10, 123.8, 122.9, 121.5, 121.4, 113.3, 109.8, 97.8, 73.0, 63.9 (q, *J* = 29.8 Hz), 47.9; **<sup>19</sup>F NMR** (376 MHz, DMSO-*d*<sub>6</sub>)  $\delta$  -71.67; **IR** (neat): 2988, 2972, 1733, 1612, 1474, 1055, 749, 560  $\text{cm}^{-1}$ ; **HRMS** (ESI): *m/z* for  $[M+H]^+$ : calcd 529.0369, found 529.0372. **HPLC**: Daicel Chiralpak IF, *n*-hexane/*i*-PrOH = 60/40, flow rate = 1 mL/min,  $\lambda$  = 254 nm,  $t_{\text{major}}$  = 15.97 min and  $t_{\text{minor}}$  = 17.57 min.  
**(2*S*,2'*S*,4'*S*,5'*R*)-4'-(2,6-dimethoxyphenyl)-5'-(trifluoromethyl)-3H-dispiro[benzofuran-2,3'-pyrrolidine-2',3''-indoline]-2'',3-dione (3am)**:

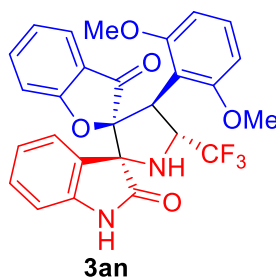

Compound **3an** was purified by flash chromatography (petroleum ether/EtOAc = 3/1) to afford a yellow solid in 75% yield (77 mg, >20:1 dr): 94% *ee*;  $[\alpha]_D^{20} = +130$  (c 1.0, in THF); **<sup>1</sup>H NMR** (400 MHz, DMSO-*d*<sub>6</sub>)  $\delta$  10.19 (s, 1H), 7.53–7.41 (m, 2H), 7.22–7.14 (m, 1H), 7.11–6.94 (m, 3H), 6.83–6.71 (m, 2H), 6.66–6.36 (m, 3H), 5.86–5.58 (m, 2H), 4.55 (d, *J* = 8.7 Hz, 1H), 3.87 (s, 3H), 3.59 (s, 3H); **<sup>13</sup>C NMR** (101 MHz, DMSO-*d*<sub>6</sub>)  $\delta$  194.0, 175.1, 169.9, 160.6, 158.5, 142.6, 138.2, 129.8, 129.2, 127.3, 126.8 (q, *J* = 280.0 Hz), 124.1, 123.2, 121.5, 121.0, 120.7, 112.3, 108.9, 108.4, 105.6, 104.2, 98.8, 71.7, 57.9 (q, *J* = 29.5 Hz), 56.3, 56.1, 41.0; **<sup>19</sup>F NMR** (376 MHz, DMSO-*d*<sub>6</sub>)  $\delta$  -71.85; **IR** (neat): 3331, 2925, 1736, 1613, 1595, 1474, 1108, 760, 620  $\text{cm}^{-1}$ ; **HRMS** (ESI) : *m/z* for  $[M+H]^+$  : calcd 511.1475, found 511.1478; **HPLC**: Daicel Chiralpak IB, *n*-hexane/*i*-PrOH = 60/40, flow rate = 1 mL/min,  $\lambda$  = 254 nm,  $t_{\text{major}}$  = 5.8 min and  $t_{\text{minor}}$  = 8.47 min.  
**(2*S*,2'*S*,4'*S*,5'*R*)-4'-(naphthalen-1-yl)-5'-(trifluoromethyl)-3H-dispiro[benzofuran-2,3'-pyrrolidine-2',3''-indoline]-2'',3-dione (3ao)**:

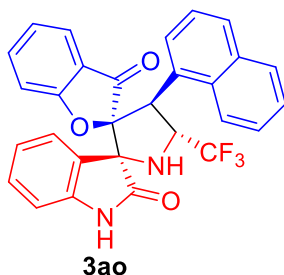

Compound **3ao** was purified by flash chromatography (petroleum ether/EtOAc = 3/1) to afford a yellow solid in 80% yield (80 mg, >20:1 dr): 97% *ee*;  $[\alpha]_D^{20} = +139$  (c 1.0, in THF); **<sup>1</sup>H NMR** (400 MHz, DMSO-*d*<sub>6</sub>)  $\delta$  10.48 (s, 1H), 8.34–8.18 (m, 1H), 7.98–7.66 (m, 3H), 7.65–7.43 (m, 4H), 7.41–7.21 (m, 2H), 7.18–6.97 (m, 2H), 6.85–6.62 (m, 3H), 6.21 (d, *J* = 10.5 Hz, 1H), 5.02–4.70 (m, 2H); **<sup>13</sup>C NMR** (101 MHz, DMSO-*d*<sub>6</sub>)  $\delta$  194.0, 174.9, 169.9, 142.4, 139.0, 133.3, 131.6, 130.2, 128.6, 128.3, 127.8, 127.1, 126.9, 126.5, 126.2 (q, *J* = 280.0 Hz) 125.7, 124.9, 123.5, 123.5, 122.6, 122.2, 121.2, 120.9, 112.8, 109.4, 97.2, 72.6, 63.0 (q, *J* = 29.5 Hz), 42.6; **<sup>19</sup>F NMR** (376 MHz, DMSO-*d*<sub>6</sub>)  $\delta$  -71.76; **IR** (neat): 3243, 2972, 1741, 1692, 1511, 1472, 1055, 754, 580  $\text{cm}^{-1}$ ; HRMS (ESI): *m/z* for  $[M+H]^+$ : calcd 501.1421, found 501.1422; **HPLC**: Daicel Chiralpak IF, *n*-hexane/*i*-PrOH = 60/40, flow rate = 1 mL/min,  $\lambda$  = 254 nm,  $t_{\text{major}}$  = 27.20 min and  $t_{\text{minor}}$  = 14.80 min; HPLC: Daicel Chiralpak IF, *n*-hexane/*i*-PrOH = 60/40, flow rate = 1 mL/min,  $\lambda$  = 254 nm,  $t_{\text{major}}$  = 8.59 min and  $t_{\text{minor}}$  = 16.53 min.  
**(2*S*,2'*S*,4'*S*,5'*R*)-4'-(naphthalen-2-yl)-5'-(trifluoromethyl)-3*H*-dispiro[benzofuran-2,3'-pyrrolidine-2',3''-indoline]-2'',3-dione (3ap):**

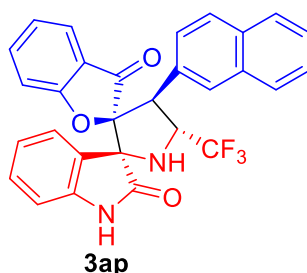

Compound **3ap** was purified by flash chromatography (petroleum ether/EtOAc = 3/1) to afford a yellow solid in 82% yield (82 mg, >20:1 dr): 90% *ee*;  $[\alpha]_D^{20} = -83$  (c 1.0, in THF); **<sup>1</sup>H NMR** (400 MHz, DMSO-*d*<sub>6</sub>)  $\delta$  10.44 (s, 1H), 7.93–7.71 (m, 4H), 7.63–7.40 (m, 5H), 7.28–7.04 (m, 3H), 6.85–6.60 (m, 3H), 5.15–4.89 (m, 2H), 4.80 (d, *J* = 9.0 Hz, 1H); **<sup>13</sup>C NMR** (101 MHz, DMSO-*d*<sub>6</sub>)  $\delta$  194.7, 175.3, 170.3, 142.9, 139.5, 133.0, 132.8, 130.7, 130.1, 128.8, 128.2, 127.8, 127.7, 126.9, 126.8, 126.7 (q, *J* = 279.8 Hz), 124.0, 123.9, 122.8, 121.6, 121.4, 113.2, 109.8, 98.3, 72.9, 62.2 (q, *J* = 29.8 Hz), 50.8; **<sup>19</sup>F NMR** (376 MHz, DMSO-*d*<sub>6</sub>)  $\delta$  -71.48; **IR** (neat): 2988, 2972, 1732, 1617, 1474, 1055, 752, 680  $\text{cm}^{-1}$ ; HRMS (ESI): *m/z* for  $[M+H]^+$ : calcd 501.1421, found 501.1426; **HPLC**: Daicel Chiralpak IC, *n*-hexane/*i*-PrOH = 60/40, flow rate = 1 mL/min,  $\lambda$  = 254 nm,  $t_{\text{major}}$  = 8.71 min and  $t_{\text{minor}}$  = 25.37 min.  
**(2*S*,2'*S*,4'*S*,5'*R*)-5'-methyl-4'-phenyl-5'-(trifluoromethyl)-3*H*-dispiro[benzofuran-2,3'-pyrrolidine-2',3''-indoline]-2'',3-dione (3aq):**

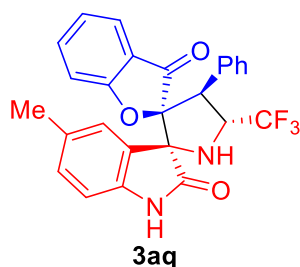

Compound **3aq** was purified by flash chromatography (petroleum ether/EtOAc = 3/1) to afford a yellow solid in 75% yield (70 mg, >20:1 dr): 94% *ee*;  $[\alpha]_{\text{D}}^{20} = +90$  (c 1.0, in THF);  $^1\text{H NMR}$  (400 MHz, DMSO- $d_6$ )  $\delta$  10.29 (s, 1H), 7.60–7.45 (m, 1H), 7.38 (s, 1H), 7.33–7.27 (m, 2H), 7.26–7.09 (m, 5H), 6.93–6.73 (m, 2H), 6.52 (d,  $J = 7.8$  Hz, 1H), 4.91–4.73 (m, 2H), 4.67 (d,  $J = 8.8$  Hz, 1H), 2.12 (s, 3H);  $^{13}\text{C NMR}$  (101 MHz, DMSO- $d_6$ )  $\delta$  194.7, 175.2, 170.4, 140.3, 139.4, 132.5, 130.7, 130.2, 129.4, 128.8, 128.5, 126.6 (q,  $J = 279.8$  Hz), 124.0, 123.9, 121.5, 113.1, 109.4, 98.1, 72.9, 62.0 (q,  $J = 29.3$  Hz), 50.6, 20.2;  $^{19}\text{F NMR}$  (376 MHz, DMSO- $d_6$ )  $\delta$  -71.56; **IR** (neat): 2988, 2960, 1731, 1509, 1463, 1128, 1066, 752, 698  $\text{cm}^{-1}$ ; **HRMS** (ESI):  $m/z$  for  $[\text{M}+\text{H}]^+$ : calcd 465.1421, found 465.1422; HPLC: Daicel Chiralpak IF, *n*-hexane/*i*-PrOH = 60/40, flow rate = 1 mL/min,  $\lambda = 254$  nm,  $t_{\text{major}} = 12.94$  min and  $t_{\text{minor}} = 10.16$  min.

**(2S,2'S,4'S,5'R)-5''-fluoro-4'-phenyl-5'-(trifluoromethyl)-3H-dispiro[benzofuran-2,3'-pyrrolidine-2',3''-indoline]-2'',3-dione (3ar):**

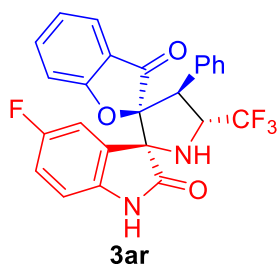

Compound **3ar** was purified by flash chromatography (petroleum ether/EtOAc = 3/1) to afford a yellow solid in 70% yield (65 mg, >20:1 dr): 91% *ee*;  $[\alpha]_{\text{D}}^{20} = +134$  (c 1.0, in THF);  $^1\text{H NMR}$  (400 MHz, DMSO- $d_6$ )  $\delta$  10.46 (s, 1H), 7.60–7.54 (m, 1H), 7.39–7.29 (m, 3H), 7.28–7.10 (m, 5H), 6.97–6.84 (m, 2H), 6.64 (dd,  $J = 8.5, 4.4$  Hz, 1H), 4.95–4.56 (m, 3H);  $^{13}\text{C NMR}$  (101 MHz, DMSO- $d_6$ )  $\delta$  194.4, 175.2, 170.2, 157.6 (d,  $J = 237.3$  Hz), 139.7, 139.0, 132.2, 129.4, 128.8, 128.5, 126.5 (q,  $J = 280.2$  Hz), 125.6, 125.5, 124.1, 123.0, 121.4, 117.1 (d,  $J = 23.2$  Hz), 115.4 (d,  $J = 25.4$  Hz), 113.2, 110.5 (d,  $J = 8.0$  Hz), 97.8, 73.0, 61.9 (q,  $J = 29.7$  Hz), 50.5;  $^{19}\text{F NMR}$  (376 MHz, DMSO- $d_6$ )  $\delta$  -71.65, -121.99; **IR** (neat): 2988, 2976, 1735, 1511, 1488, 1066, 750, 639  $\text{cm}^{-1}$ ; **HRMS** (ESI):  $m/z$  for  $[\text{M}+\text{H}]^+$ : calcd 469.1170, found 469.1171, **HPLC**: Daicel Chiralpak IC, *n*-hexane/*i*-PrOH = 80/20, flow rate = 1 mL/min,  $\lambda = 254$  nm,  $t_{\text{major}} = 6.67$  min and  $t_{\text{minor}} = 13.81$  min.

**(2S,2'S,4'S,5'R)-5''-chloro-4'-phenyl-5'-(trifluoromethyl)-3H-dispiro[benzofuran-2,3'-pyrrolidine-2',3''-indoline]-2'',3-dione (3as):**

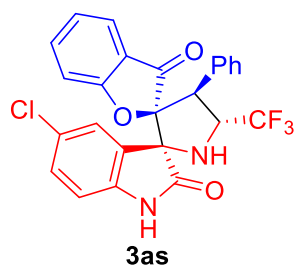

Compound **3as** was purified by flash chromatography (petroleum ether/EtOAc = 3/1) to afford a yellow solid in 72% yield (70 mg, >20:1 dr): 93% *ee*;  $[\alpha]_{\text{D}}^{20} = +68$  (c 1.0, in THF);  $^1\text{H NMR}$  (400 MHz, DMSO- $d_6$ )  $\delta$  10.59 (s, 1H), 7.61–7.54 (m, 2H), 7.35–7.30 (m, 2H), 7.27–7.10 (m, 6H), 6.90–6.82 (m, 1H), 6.67 (d,  $J = 8.3$  Hz, 1H), 4.95–4.54 (m, 3H);  $^{13}\text{C NMR}$  (101 MHz, DMSO- $d_6$ )  $\delta$  194.4, 174.9, 170.3, 141.7, 139.7, 132.1, 130.4, 129.4, 128.8, 128.5, 127.9, 126.5 (q,  $J = 281.1$  Hz), 125.8, 125.5, 124.1, 123.0, 121.4, 113., 111.2, 97.8, 72.9, 61.9 (q,  $J = 29.7$  Hz), 50.6;  $^{19}\text{F NMR}$  (376 MHz, DMSO- $d_6$ )  $\delta$  -71.72; **IR** (neat): 2991, 2970, 1734, 1511, 1488, 1066, 750, 639  $\text{cm}^{-1}$ ; **HRMS** (ESI):  $m/z$  for  $[\text{M}+\text{H}]^+$ : calcd 485.0874, found 485.0875; **HPLC**: Daicel Chiralpak IF, *n*-hexane/*i*-PrOH = 70/30, flow rate = 1.2 mL/min,  $\lambda = 254$  nm,  $t_{\text{major}} = 13.85$  min and  $t_{\text{minor}} = 12.11$  min.

**(2S,2'S,4'S,5'R)-5''-bromo-4'-phenyl-5'-(trifluoromethyl)-3H-dispiro[benzofuran-2,3'-pyrrolidine-2',3''-indoline]-2'',3-dione (3at):**

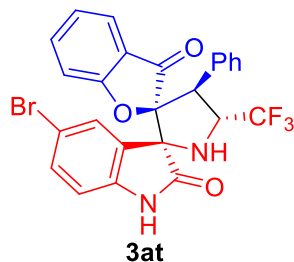

Compound **3at** was purified by flash chromatography (petroleum ether/EtOAc = 3/1) to afford a yellow solid in 90% yield (95 mg, >20:1 dr): 97% *ee*;  $[\alpha]_{\text{D}}^{20} = +19$  (c 1.0, in THF);  $^1\text{H NMR}$  (400 MHz, DMSO- $d_6$ )  $\delta$  10.59 (s, 1H), 7.73–7.65 (m, 1H), 7.60–7.49 (m, 1H), 7.36–7.02 (m, 8H), 6.92–6.82 (m, 1H), 6.63 (d,  $J = 8.3$  Hz, 1H), 4.92–4.66 (m, 3H);  $^{13}\text{C NMR}$  (101 MHz, DMSO- $d_6$ )  $\delta$  194.6, 174.9, 170.3, 141.9, 139.8, 133.3, 132.1, 130.6, 129.4, 128.8, 128.6, 126.5 (q,  $J = 280.8$  Hz), 126.1, 124.1, 123.1, 121.3, 113.3, 113.1, 111.8, 97.8, 72.9, 61.9 (q,  $J = 29.5$  Hz), 50.5;  $^{19}\text{F NMR}$  (376 MHz, DMSO- $d_6$ )  $\delta$  -71.73; **IR** (neat): 3380, 2988, 2972, 1735, 1488, 1066, 750, 639  $\text{cm}^{-1}$ ; **HRMS** (ESI):  $m/z$  for  $[\text{M}+\text{H}]^+$ : calcd 529.0369, found 529.0369; **HPLC**: Daicel Chiralpak IF, *n*-hexane/*i*-PrOH = 60/40, flow rate = 1 mL/min,  $\lambda = 254$  nm,  $t_{\text{major}} = 16.78$  min and  $t_{\text{minor}} = 13.46$  min.

**(2S,2'S,4'S,5'R)-7''-bromo-4'-phenyl-5'-(trifluoromethyl)-3H-dispiro[benzofuran-2,3'-pyrrolidine-2',3''-indoline]-2'',3-dione (3au):**

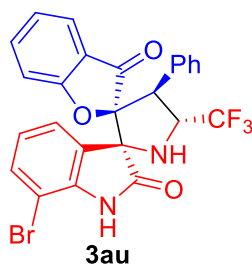

Compound **3au** was purified by flash chromatography (petroleum ether/EtOAc = 3/1) to afford a yellow solid in 95% yield (101 mg, >20:1 dr): 97% *ee*;  $[\alpha]_{\text{D}}^{20} = +262$  (c 1.0, in THF);  $^1\text{H NMR}$  (400 MHz, DMSO-*d*<sub>6</sub>)  $\delta$  10.77 (s, 1H), 7.61–7.49 (m, 2H), 7.34–7.08 (m, 8H), 6.90–6.72 (m, 2H), 4.99–4.59 (m, 3H);  $^{13}\text{C NMR}$  (101 MHz, DMSO-*d*<sub>6</sub>)  $\delta$  194.1, 174.6, 169.8, 141.7, 139.1, 133.1, 131.7, 128.9, 128.3, 128.0, 126.3, 126.1 (q,  $J = 280.5$  Hz), 125.3, 123.6, 122.7, 122.5, 120.8, 112.8, 101.5, 97.3, 73.0, 61.5 (q,  $J = 30.0$  Hz), 50.2;  $^{19}\text{F NMR}$  (376 MHz, DMSO-*d*<sub>6</sub>)  $\delta$  -71.60; **IR** (neat): 2958, 2952, 2951, 1733, 1512, 1452, 1130, 1077, 798, 638  $\text{cm}^{-1}$ ; **HRMS** (ESI):  $m/z$  for  $[\text{M}+\text{H}]^+$ : calcd 529.0369, found 529.0369; **HPLC**: Daicel Chiralpak IF, *n*-hexane/*i*-PrOH = 70/30, flow rate = 1 mL/min,  $\lambda = 254$  nm,  $t_{\text{major}} = 5.58$  min and  $t_{\text{minor}} = 6.38$  min.

**(2*S*,2'*R*,4'*S*,5'*R*)-4'-phenyl-5'-(trifluoromethyl)-3*H*-dispiro[benzo[*b*]thiophene-2,3'-pyrrolidine-2',3''-indoline]-2'',3-dione (3ba):**

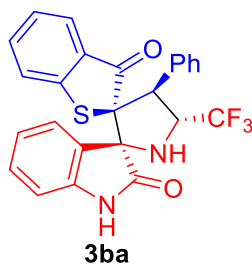

Compound **3ba** was purified by flash chromatography (petroleum ether/EtOAc = 3/1) to afford a yellow solid in 70% yield (76 mg, >20:1 dr): 97% *ee*;  $[\alpha]_{\text{D}}^{20} = +246$  (c 1.0, in THF);  $^1\text{H NMR}$  (400 MHz, DMSO-*d*<sub>6</sub>)  $\delta$  10.29 (s, 1H), 7.88–7.77 (m, 1H), 7.38–7.11 (m, 8H), 7.02 (m, 2H), 6.88–6.75 (m, 1H), 6.58 (d,  $J = 7.7$  Hz, 1H), 5.56 (d,  $J = 11.0$  Hz, 1H), 4.80–4.56 (m, 2H);  $^{13}\text{C NMR}$  (101 MHz, DMSO-*d*<sub>6</sub>)  $\delta$  197.0, 176.7, 149.5, 142.9, 136.8, 133.8, 130.8, 130.6, 130.0, 128.5, 128.21, 128.19, 126.5 (q,  $J = 281.1$  Hz), 126.2, 125.5, 124.4, 120.5, 109.2, 81.7, 74.2, 60.5 (q,  $J = 29.7$  Hz), 49.9;  $^{19}\text{F NMR}$  (376 MHz, DMSO-*d*<sub>6</sub>)  $\delta$  -70.28; **IR** (neat): 2988, 2972, 1732, 1394, 1283, 1066, 752, 598  $\text{cm}^{-1}$ ; **HRMS** (ESI):  $m/z$  for  $[\text{M}+\text{H}]^+$ : calcd 467.1036, found 467.1038; **HPLC**: Daicel Chiralpak IB, *n*-hexane/*i*-PrOH = 70/30, flow rate = 1 mL/min,  $\lambda = 254$  nm,  $t_{\text{major}} = 7.40$  min and  $t_{\text{minor}} = 7.00$  min.

**(2*S*,2'*R*,4'*S*,5'*R*)-4'-(4-methoxyphenyl)-5'-(trifluoromethyl)-3*H*-dispiro[benzo[*b*]thiophene-2,3'-pyrrolidine-2',3''-indoline]-2'',3-dione (3bb):**

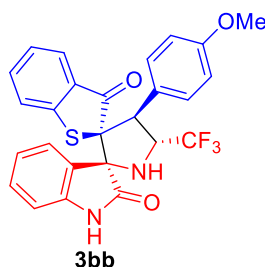

Compound **3bb** was purified by flash chromatography (petroleum ether/EtOAc = 3/1) to afford a yellow solid in 60% yield (60 mg, >20:1 dr): 88% *ee*;  $[\alpha]_{\text{D}}^{20} = +241$  (c 1.0, in THF);  $^1\text{H NMR}$  (400 MHz, DMSO-*d*<sub>6</sub>)  $\delta$  10.28 (s, 1H), 7.93–7.68 (m, 1H), 7.42–7.15 (m, 5H), 7.11–6.92 (m, 2H), 6.87–6.46 (m, 4H), 5.50 (d,  $J = 10.4$  Hz, 1H), 4.82–4.38 (m, 2H), 3.63 (s, 3H);  $^{13}\text{C NMR}$  (101 MHz, DMSO-*d*<sub>6</sub>)  $\delta$  197.1, 176.8, 158.9, 149.6, 142.9, 136.7, 131.1, 130.9, 130.5, 128.4, 126.6 (q,  $J = 280.7$  Hz), 126.2, 125.6, 125.4, 125.2, 124.4, 120.5, 113.6, 109.2, 81.9, 74.2, 60.7 (q,  $J = 29.8$  Hz), 55.3, 49.3;

**<sup>19</sup>F NMR** (376 MHz, DMSO-d<sub>6</sub>) δ -70.25; **IR** (neat): 2988, 2972, 1732, 1617, 1515, 1412, 1132, 1056, 753, 614 cm<sup>-1</sup>; **HRMS** (ESI): m/z for [M+H]<sup>+</sup>: calcd 497.1141, found 497.1145; **HPLC**: Daicel Chiralpak IF, *n*-hexane/*i*-PrOH = 60/40, flow rate = 1 mL/min, λ = 254 nm, t<sub>major</sub> = 7.89 min and t<sub>minor</sub> = 11.99 min.

**(2S,2'R,4'S,5'R)-4'-(4-bromophenyl)-5'-(trifluoromethyl)-3H-dispiro[benzo[b]thiophene-2,3'-pyrrolidine-2',3''-indoline]-2'',3-dione (3bc):**

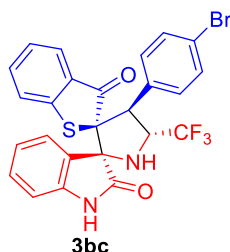

Compound **3bc** was purified by flash chromatography (petroleum ether/EtOAc = 3/1) to afford a yellow solid in 70% yield (76 mg, >20:1 dr): 89% *ee*; [α]<sub>D</sub><sup>20</sup> = +238 (c 1.0, in THF); **<sup>1</sup>H NMR** (400 MHz, DMSO-d<sub>6</sub>) δ 10.32 (s, 1H), 8.01–7.72 (m, 1H), 7.58–6.96 (m, 9H), 6.89–6.42 (m, 2H), 5.53 (d, *J* = 8.0 Hz, 1H), 4.92–4.23 (m, 2H); **<sup>13</sup>C NMR** (101 MHz, DMSO-d<sub>6</sub>) δ 196.8, 176.7, 149.3, 142.9, 136.9, 133.3, 132.2, 131.3, 130.7, 130.6, 128.4, 126.5 (q, *J* = 281.8 Hz), 126.3, 125.7, 124.9, 124.5, 121.6, 120.5, 109.2, 81.4, 74.2, 60.4 (q, *J* = 31.3 Hz), 49.3, **<sup>19</sup>F NMR** (376 MHz, DMSO-d<sub>6</sub>) δ -70.39; **IR** (neat): 2988, 2972, 1732, 1393, 1283, 1066, 753, 562 cm<sup>-1</sup>; **HRMS** (ESI): m/z for [M+H]<sup>+</sup>: calcd 545.0141, found 545.0145; **HPLC**: Daicel Chiralpak IF, *n*-hexane/*i*-PrOH = 60/40, flow rate = 1 mL/min, λ = 254 nm, t<sub>major</sub> = 28.05 min and t<sub>minor</sub> = 16.90 min.

**(2S,2'R,4'S,5'R)-5''-methyl-4'-phenyl-5'-(trifluoromethyl)-3H-dispiro[benzo[b]thiophene-2,3'-pyrrolidine-2',3''-indoline]-2'',3-dione (3bd):**

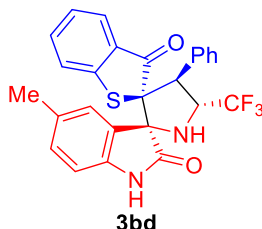

Compound **3bd** was purified by flash chromatography (petroleum ether/EtOAc = 3/1) to afford a yellow solid in 80% yield (77 mg, >20:1 dr): 91% *ee*; [α]<sub>D</sub><sup>20</sup> = +179 (c 1.0, in THF); **<sup>1</sup>H NMR** (400 MHz, DMSO-d<sub>6</sub>) δ 10.18 (s, 1H), 7.67 (s, 1H), 7.40–7.32 (m, 2H), 7.32–7.25 (m, 3H), 7.24–7.10 (m, 3H), 7.03–6.81 (m, 2H), 6.53–6.36 (m, 1H), 5.64–5.37 (m, 1H), 4.66 (m, 2H), 2.17 (s, 3H); **<sup>13</sup>C NMR** (101 MHz, DMSO-d<sub>6</sub>) δ 197.0, 176.8, 149.5, 140.4, 136.8, 133.9, 130.9, 130.7, 129.9, 129.2, 129.1, 128.2, 128.2, 126.5 (q, *J* = 280.1 Hz), 126.1, 125.5, 125.2, 124.3, 108.9, 81.7, 74.2, 60.5 (q, *J* = 30.1 Hz), 50.0, 21.3; **<sup>19</sup>F NMR** (376 MHz, DMSO-d<sub>6</sub>) δ -70.29; **IR** (neat): 2988, 2975, 1731, 1393, 1283, 1131, 1066, 697, 620 cm<sup>-1</sup>; **HRMS** (ESI): m/z for [M+H]<sup>+</sup>: calcd 481.1192, found 481.1195; **HPLC**: Daicel Chiralpak IC, *n*-hexane/*i*-PrOH = 60/40, flow rate = 1 mL/min, λ = 254 nm, t<sub>major</sub> = 6.52 min and t<sub>minor</sub> = 19.06 min.

**(2S,2'R,4'S,5'R)-5''-chloro-4'-phenyl-5'-(trifluoromethyl)-3H-dispiro[benzo[b]thiophene-2,3'-pyrrolidine-2',3''-indoline]-2'',3-dione (3be):**

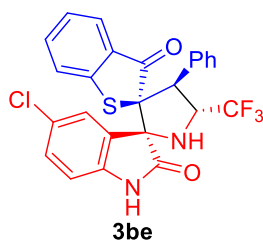

Compound **3be** was purified by flash chromatography (petroleum ether/EtOAc = 3/1) to afford a yellow solid in 83% yield (83 mg, >20:1 dr): 98% *ee*;  $[\alpha]_D^{20} = +113$  (c 1.0, in THF);  $^1\text{H NMR}$  (400 MHz,  $\text{CDCl}_3$ )  $\delta$  8.75 (s, 1H), 7.75–7.67 (m, 1H), 7.39–7.15 (m, 5H), 7.13–6.96 (m, 5H), 6.90–6.80 (m, 1H), 6.64–6.57 (m, 1H), 5.57 (d,  $J = 11.0$  Hz, 1H), 4.66–4.50 (m, 1H), 2.74 (d,  $J = 6.6$  Hz, 1H);  $^{13}\text{C NMR}$  (101 MHz,  $\text{CDCl}_3$ )  $\delta$  196.5, 177.9, 148.8, 140.4, 136.1, 132.4, 130.9, 130.4, 129.7, 128.0, 127.8, 127.7, 126.9, 126.6, 126.5, 125.4 (q,  $J = 281.1$  Hz), 125.1, 123.7, 110.9, 80.7, 73.8, 61.0 (q,  $J = 31.1$  Hz), 50.2;  $^{19}\text{F NMR}$  (376 MHz,  $\text{CDCl}_3$ )  $\delta$  -71.91; **IR** (neat): 3357, 2988, 2972, 1750, 1634, 1586, 1450, 1131, 754, 625  $\text{cm}^{-1}$ ; **HRMS** (ESI):  $m/z$  for  $[\text{M}+\text{H}]^+$ : calcd 501.0646, found 501.0649; **HPLC**: Daicel Chiralpak IC, *n*-hexane/*i*-PrOH = 60/40, flow rate = 1 mL/min,  $\lambda = 254$  nm,  $t_{\text{major}} = 4.25$  min and  $t_{\text{minor}} = 8.49$  min.

**(2S,2'R,4'S,5'R)-5''-bromo-4'-phenyl-5'-(trifluoromethyl)-3H-dispiro[benzo[b]thiophene-2,3'-pyrrolidine-2',3''-indoline]-2'',3-dione (3bf):**

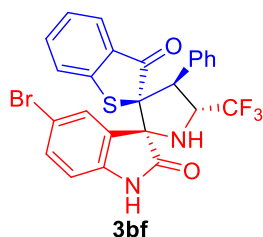

Compound **3bf** was purified by flash chromatography (petroleum ether/EtOAc = 3/1) to afford a yellow solid in 85% yield (93 mg, >20:1 dr): 97% *ee*;  $[\alpha]_D^{20} = +48$  (c 1.0, in THF);  $^1\text{H NMR}$  (400 MHz,  $\text{CDCl}_3$ )  $\delta$  8.79 (s, 1H), 7.87–7.78 (m, 1H), 7.38–7.27 (m, 2H), 7.21–6.96 (m, 7H), 6.89–6.79 (m, 1H), 6.58 (d,  $J = 8.3$  Hz, 1H), 5.57 (d,  $J = 11.0$  Hz, 1H), 4.62–4.49 (m, 1H), 2.74 (d,  $J = 6.6$  Hz, 1H);  $^{13}\text{C NMR}$  (101 MHz,  $\text{CDCl}_3$ )  $\delta$  196.5, 177.8, 148.8, 140.9, 136.1, 133.3, 132.5, 130.9, 130.4, 129.8, 128.0, 127.8, 127.3, 126.5, 125.4 (q,  $J = 280.9$  Hz), 125.1, 123.7, 113.8, 111.5, 80.8, 73.8, 61.1 (q,  $J = 31.0$  Hz), 50.2;  $^{19}\text{F NMR}$  (376 MHz,  $\text{CDCl}_3$ )  $\delta$  -71.91; **IR** (neat): 3354, 2988, 2959, 1740, 1585, 1474, 1128, 1066, 753, 695  $\text{cm}^{-1}$ ; **HRMS** (ESI):  $m/z$  for  $[\text{M}+\text{H}]^+$ : calcd 545.0141, found 545.0140; **HPLC**: Daicel Chiralpak IC, *n*-hexane/*i*-PrOH = 60/40, flow rate = 1 mL/min,  $\lambda = 254$  nm,  $t_{\text{major}} = 4.93$  min and  $t_{\text{minor}} = 9.00$  min.

## Derivatization of 3aa

To a stirred solution of **3aa** (0.3 mmol, 1.0 equiv.) in DMF (2.0 mL) at 0 °C, was added NaH (60% dispersion in mineral oil, 15 mg, 0.36 mmol, 1.2 equiv.) in one portion and stirred for 5 minutes. Benzyl bromide (1.2 equiv.) was added at 0 °C, and continued to be stirred at room temperature. The progress of the reaction was monitored by TLC. The reaction mixture was then poured into saturated aqueous NH<sub>4</sub>Cl (2.0 mL) and extracted with ethyl acetate (2.0 mL). The combined organic portions were washed with water and brine, dried over Na<sub>2</sub>SO<sub>4</sub>, and concentrated in vacuo. The residue was purified by flash column chromatography on silica gel to give products **4**.

**(2*S*,2'*S*,4'*S*,5'*R*)-1''-benzyl-4'-phenyl-5'-(trifluoromethyl)-3H-dispiro[benzofuran-2,3'-pyrrolidine-2',3''-indoline]-2'',3-dione (4):** Compound **4** was purified by flash chromatography (petroleum ether/EtOAc = 6/1) to afford a white solid in 95% yield (86 mg, >20:1 dr): 94% *ee*; [ $\alpha$ ]<sub>D</sub><sup>20</sup> = +123 (c 1.0, in THF); <sup>1</sup>H NMR (400 MHz, CDCl<sub>3</sub>)  $\delta$  7.57–7.50 (m, 1H), 7.42–7.29 (m, 7H), 7.27–7.20 (m, 3H), 7.18–7.08 (m, 3H), 7.05–6.97 (m, 2H), 6.86–6.79 (m, 1H), 6.76 (t, *J* = 7.4 Hz, 1H), 6.48 (d, *J* = 7.8 Hz, 1H), 5.25–5.14 (m, 2H), 4.93–4.77 (m, 1H), 4.57 (d, *J* = 15.6 Hz, 1H), 2.95 (d, *J* = 8.4 Hz, 1H); <sup>13</sup>C NMR (101 MHz, CDCl<sub>3</sub>)  $\delta$  194.3, 174.1, 170.1, 143.6, 138.4, 135.4, 131.3, 130.5, 129.3, 129.1, 128.8, 128.3, 128.1, 127.6, 127.0, 125.8, 124.3, 123.7, 122.5, 122.2, 121.7, 112.3, 109.5, 97.7, 72.1, 62.4 (q, *J* = 31.0 Hz), 51.1, 44.4; <sup>19</sup>F NMR (376 MHz, CDCl<sub>3</sub>)  $\delta$  -73.23; IR (neat): 2920, 1724, 1610, 1127, 856, 752, 698 cm<sup>-1</sup>; HRMS (ESI): *m/z* for [M+H]<sup>+</sup>: calcd 541.1734, found 541.1730; HPLC: Daicel Chiralpak IF, *n*-hexane/*i*-PrOH = 60/40, flow rate = 1 mL/min,  $\lambda$  = 254 nm, *t*<sub>major</sub> = 6.12 min and *t*<sub>minor</sub> = 8.86 min.

## References

1. Trost, B. M.; Ito, H. *J. Am. Chem. Soc.* **2000**, *122*, 12003-12004.
2. (a) Hua, Y.-Z.; Chen, J.-W.; Yang, H.; Wang, M.-C. *J. Org. Chem.* **2018**, *83*, 1160–1166; (b) Liu, M.-M.; Yang, X.-C.; Hua, Y.-Z.; Chang, J.-B.; Wang, M.-C. *Org. Lett.* **2019**, *21*, 2111–2115.
3. Yang, X.-C.; Liu, M.-M.; Mathey, F.; Yang, H.; Hua, Y.-Z.; Wang, M.-C. *J. Org. Chem.* **2019**, *84*, 7762–7093.
4. (a) Wu, D.; Mei, H.; Tan, P.; Lu, W.; Zhu, J.; Wang, W.; Huang, J.; Li, J. *Tetrahedron Lett* **2015**, *56*, 4383–4387; (b) Formánek, B.; Tauchman, J.; Císařová, I.; Veselý, J. *J. Org. Chem.* **2020**, *85*, 8510–8521.
5. Li, X.; Su, J.; Liu, Z.; Zhu, Y.; Dong, Z.; Qiu, S.; Wang, J.; Lin, L.; Shen, Z.; Yan, W.; Wang, K.; Wang, R. *Org. Lett.* **2016**, *18*, 956-959.



## X-ray crystal structure of 3af (PE/EA = 4/1 at rt)

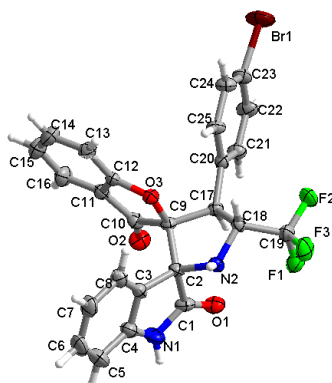

### checkCIF/PLATON report

Structure factors have been supplied for datablock(s) 202008157

THIS REPORT IS FOR GUIDANCE ONLY. IF USED AS PART OF A REVIEW PROCEDURE FOR PUBLICATION, IT SHOULD NOT REPLACE THE EXPERTISE OF AN EXPERIENCED CRYSTALLOGRAPHIC REFEREE.

No syntax errors found.    CIF dictionary    Interpreting this report

### Datablock: 202008157

---

|                        |                                            |                                  |                   |
|------------------------|--------------------------------------------|----------------------------------|-------------------|
| Bond precision:        | C-C = 0.0129 Å                             | Wavelength=1.54184               |                   |
| Cell:                  | a=7.0824 (5)                               | b=9.9984 (8)                     | c=11.3089 (9)     |
|                        | alpha=113.621 (8)                          | beta=101.541 (7)                 | gamma=100.342 (7) |
| Temperature:           | 293 K                                      |                                  |                   |
|                        | Calculated                                 | Reported                         |                   |
| Volume                 | 688.15 (11)                                | 688.15 (10)                      |                   |
| Space group            | P 1                                        | P 1                              |                   |
| Hall group             | P 1                                        | P 1                              |                   |
| Moiety formula         | C25 H16 Br F3 N2 O3, C4 H8 O2              | C25 H16 Br F3 N2 O3, C4 H8 O2    |                   |
| Sum formula            | C29 H24 Br F3 N2 O5                        | C29 H24 Br F3 N2 O5              |                   |
| Mr                     | 617.40                                     | 617.41                           |                   |
| Dx, g cm <sup>-3</sup> | 1.490                                      | 1.490                            |                   |
| Z                      | 1                                          | 1                                |                   |
| Mu (mm <sup>-1</sup> ) | 2.584                                      | 2.584                            |                   |
| F000                   | 314.0                                      | 314.0                            |                   |
| F000'                  | 314.33                                     |                                  |                   |
| h, k, lmax             | 8, 11, 13                                  | 8, 11, 13                        |                   |
| Nref                   | 4928 [ 2464]                               | 3900                             |                   |
| Tmin, Tmax             | 0.694, 0.772                               | 0.436, 1.000                     |                   |
| Tmin'                  | 0.630                                      |                                  |                   |
| Correction method=     | # Reported T Limits: Tmin=0.436 Tmax=1.000 |                                  |                   |
| AbsCorr =              | MULTI-SCAN                                 |                                  |                   |
| Data completeness=     | 1.58/0.79                                  | Theta(max)= 67.108               |                   |
| R(reflections)=        | 0.0487 ( 3281)                             | wR2(reflections)= 0.1303 ( 3900) |                   |
| S =                    | 1.028                                      | Npar= 372                        |                   |

---

The following ALERTS were generated. Each ALERT has the format  
**test-name ALERT alert-type alert-level**.  
Click on the hyperlinks for more details of the test.

---

● **Alert level C**

|                   |                                                                        |        |        |
|-------------------|------------------------------------------------------------------------|--------|--------|
| PLAT090_ALERT_3_C | Poor Data / Parameter Ratio (Zmax > 18) .....                          | 6.62   | Note   |
| PLAT245_ALERT_2_C | U(iso) H1                   Smaller than U(eq) N1                   by | 0.021  | Ang**2 |
| PLAT260_ALERT_2_C | Large Average Ueq of Residue Including                   O4            | 0.157  | Check  |
| PLAT341_ALERT_3_C | Low Bond Precision on   C-C Bonds .....                                | 0.0129 | Ang.   |
| PLAT915_ALERT_3_C | No Flack x Check Done: Low Friedel Pair Coverage                       | 58     | %      |

---

● **Alert level G**

|                   |                                                                           |       |              |
|-------------------|---------------------------------------------------------------------------|-------|--------------|
| PLAT002_ALERT_2_G | Number of Distance or Angle Restraints on AtSite                          | 9     | Note         |
| PLAT003_ALERT_2_G | Number of Uiso or Uij Restrained non-H Atoms ...                          | 2     | Report       |
| PLAT012_ALERT_1_G | No                   shelx_res_checksum Found in CIF .....                |       | Please Check |
| PLAT172_ALERT_4_G | The CIF-Embedded .res File Contains DFIX Records                          | 6     | Report       |
| PLAT186_ALERT_4_G | The CIF-Embedded .res File Contains ISOR Records                          | 1     | Report       |
| PLAT199_ALERT_1_G | Reported _cell_measurement_temperature .....                              | 293   | Check        |
| PLAT200_ALERT_1_G | Reported _diffn_ambient_temperature .....                                 | 293   | Check        |
| PLAT242_ALERT_2_G | Low   'MainMol' Ueq as Compared to Neighbors of                           | C19   | Check        |
| PLAT398_ALERT_2_G | Deviating   C-O-C    Angle From 120 for O3                                | 107.6 | Degree       |
| PLAT791_ALERT_4_G | Model has Chirality at C2                                   (Sohnke SpGr) | S     | Verify       |
| PLAT791_ALERT_4_G | Model has Chirality at C9                                   (Sohnke SpGr) | S     | Verify       |
| PLAT791_ALERT_4_G | Model has Chirality at C17                                  (Sohnke SpGr) | S     | Verify       |
| PLAT791_ALERT_4_G | Model has Chirality at C18                                  (Sohnke SpGr) | R     | Verify       |
| PLAT860_ALERT_3_G | Number of Least-Squares Restraints .....                                  | 21    | Note         |
| PLAT909_ALERT_3_G | Percentage of I>2sig(I) Data at Theta(Max) Still                          | 63%   | Note         |
| PLAT978_ALERT_2_G | Number C-C Bonds with Positive Residual Density.                          | 0     | Info         |

---

0 **ALERT level A** = Most likely a serious problem - resolve or explain  
0 **ALERT level B** = A potentially serious problem, consider carefully  
5 **ALERT level C** = Check. Ensure it is not caused by an omission or oversight  
16 **ALERT level G** = General information/check it is not something unexpected

3 **ALERT type 1** CIF construction/syntax error, inconsistent or missing data  
7 **ALERT type 2** Indicator that the structure model may be wrong or deficient  
5 **ALERT type 3** Indicator that the structure quality may be low  
6 **ALERT type 4** Improvement, methodology, query or suggestion  
0 **ALERT type 5** Informative message, check

---

# NMR Spectra of compounds

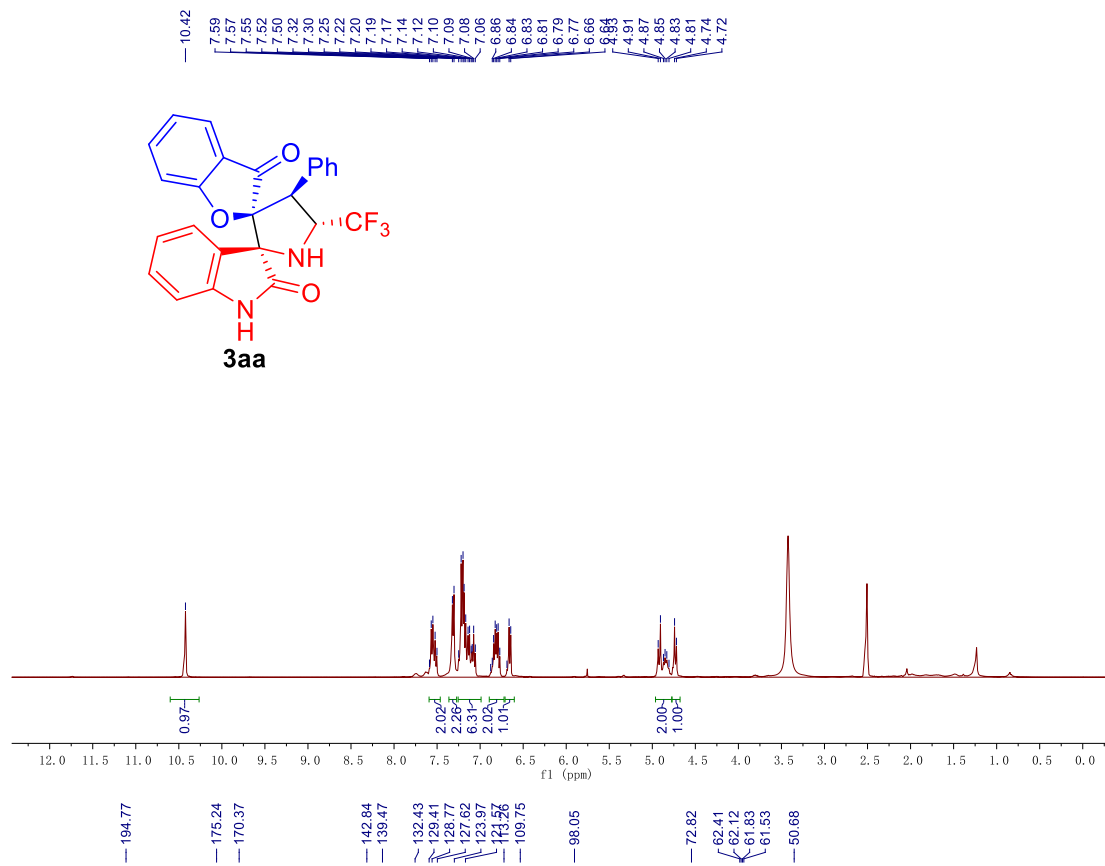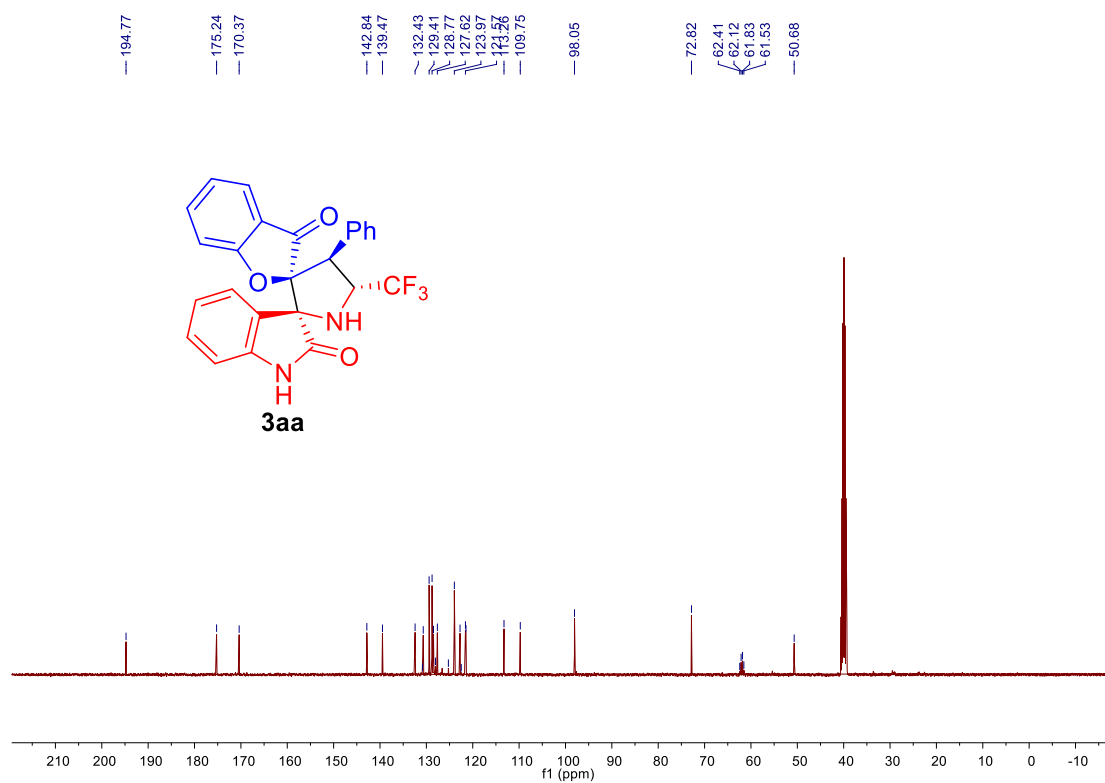

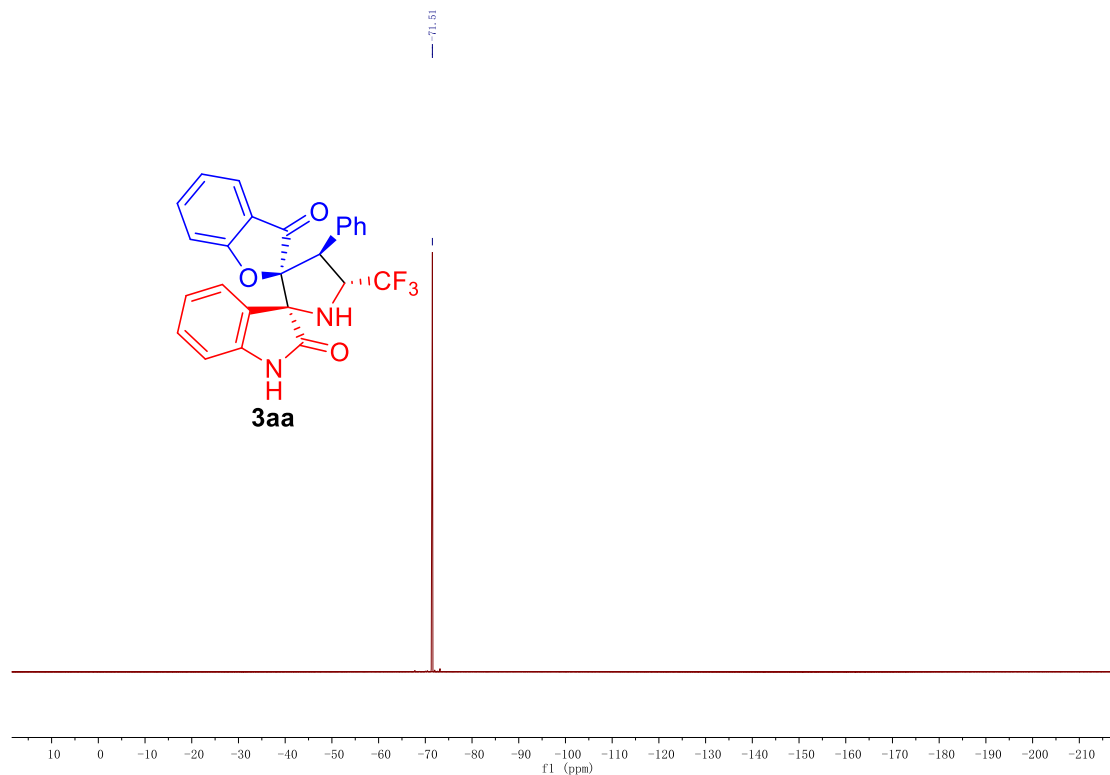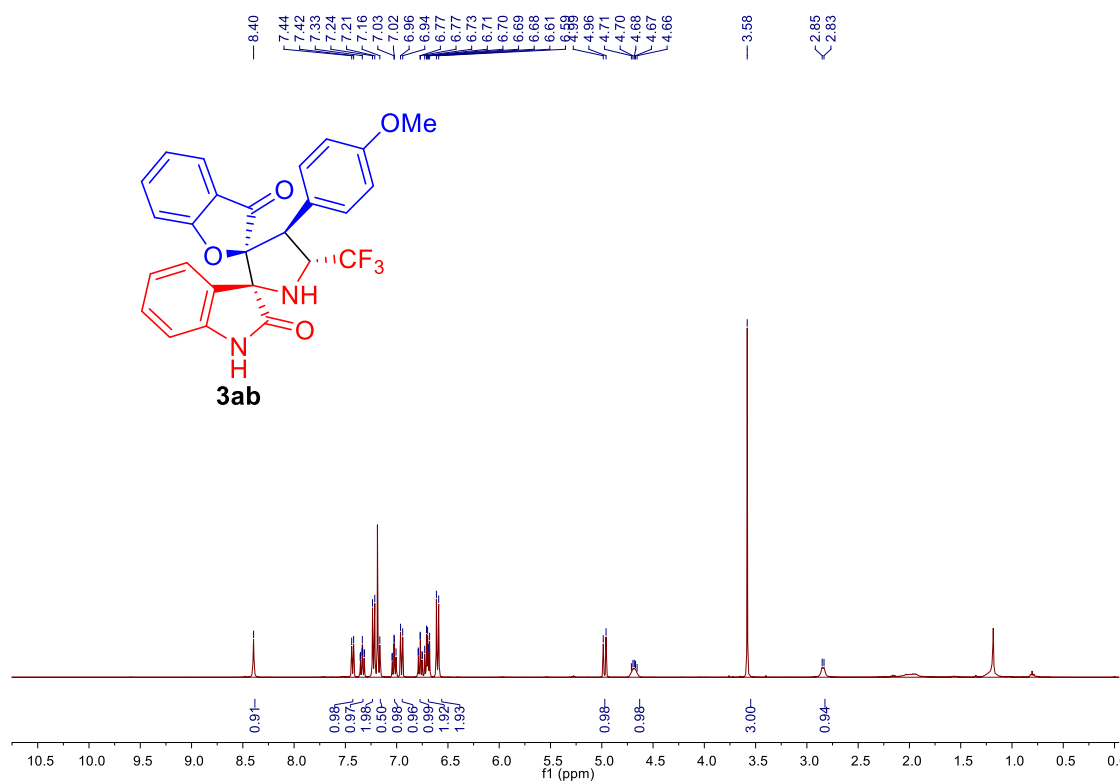

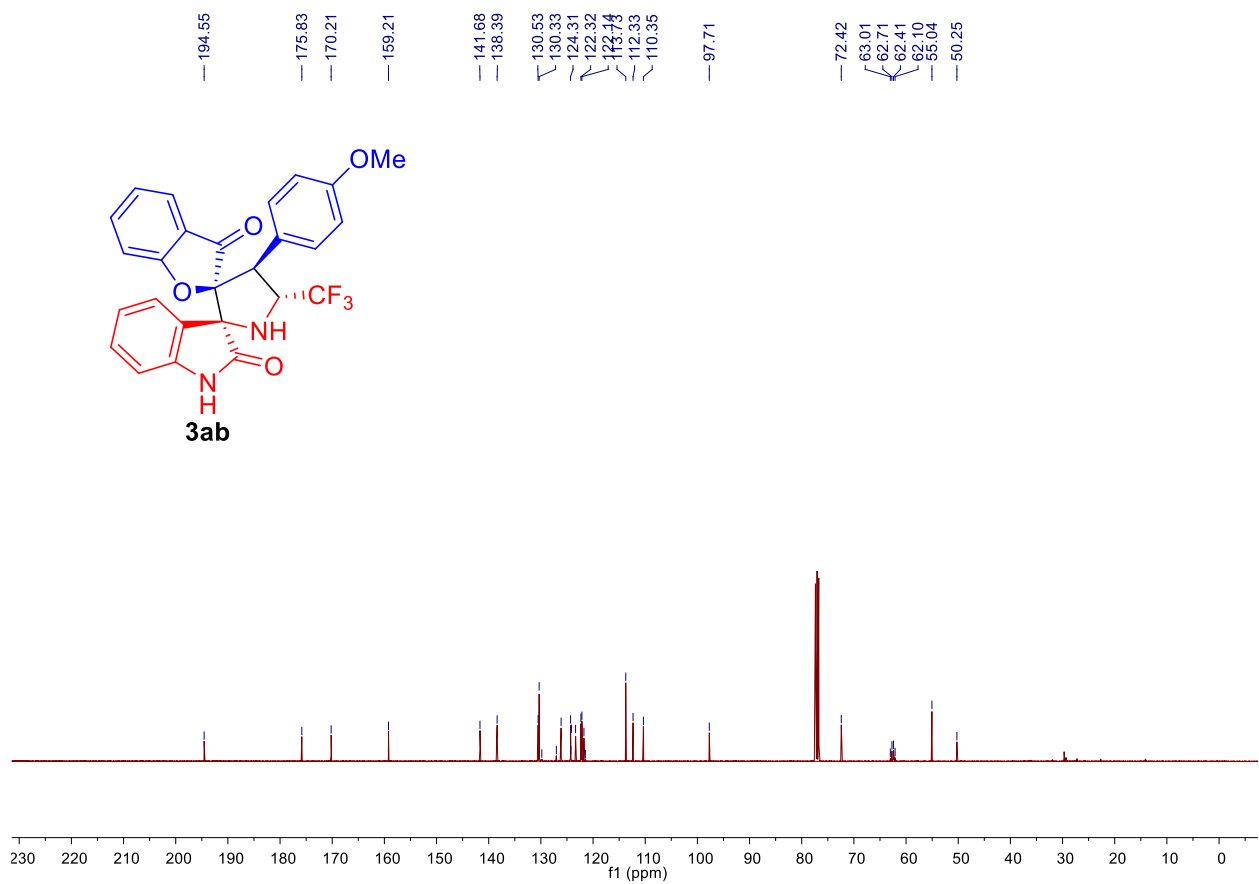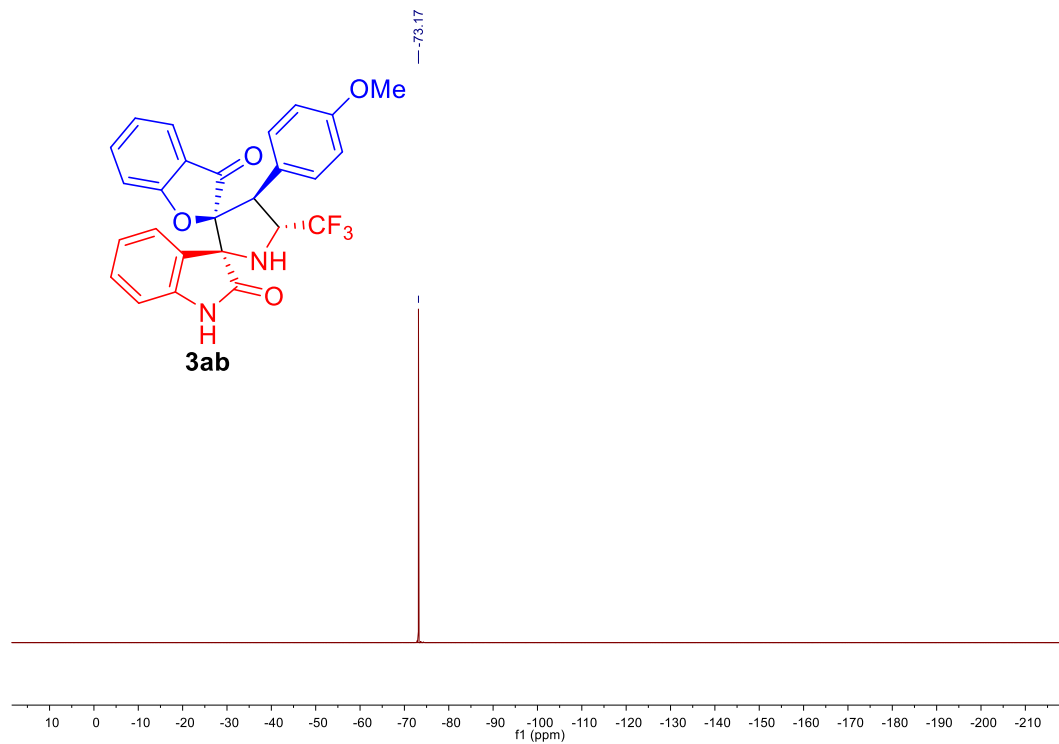

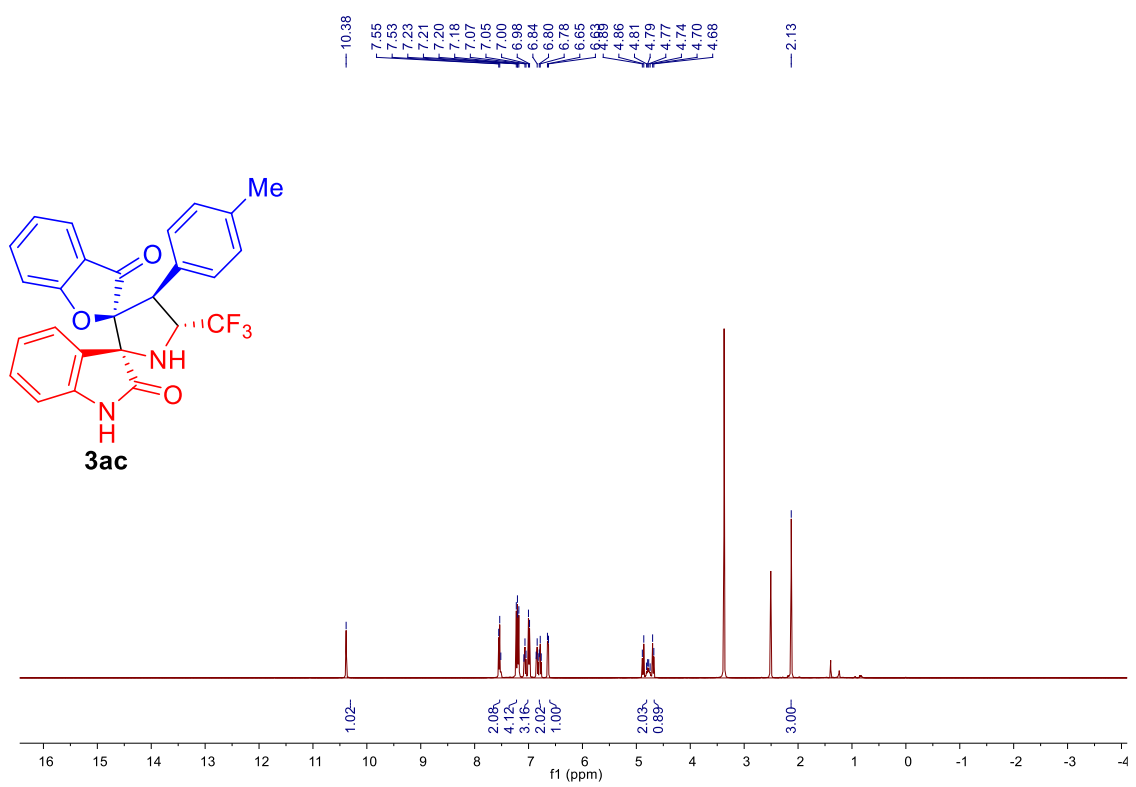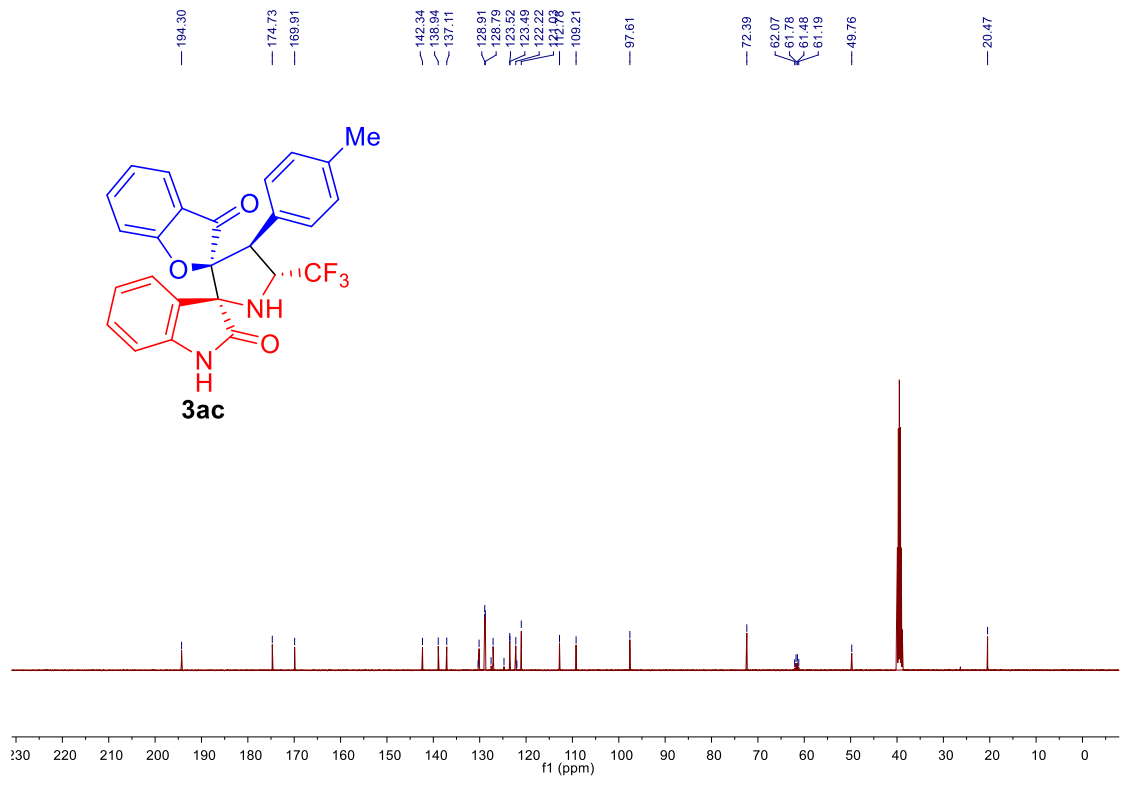

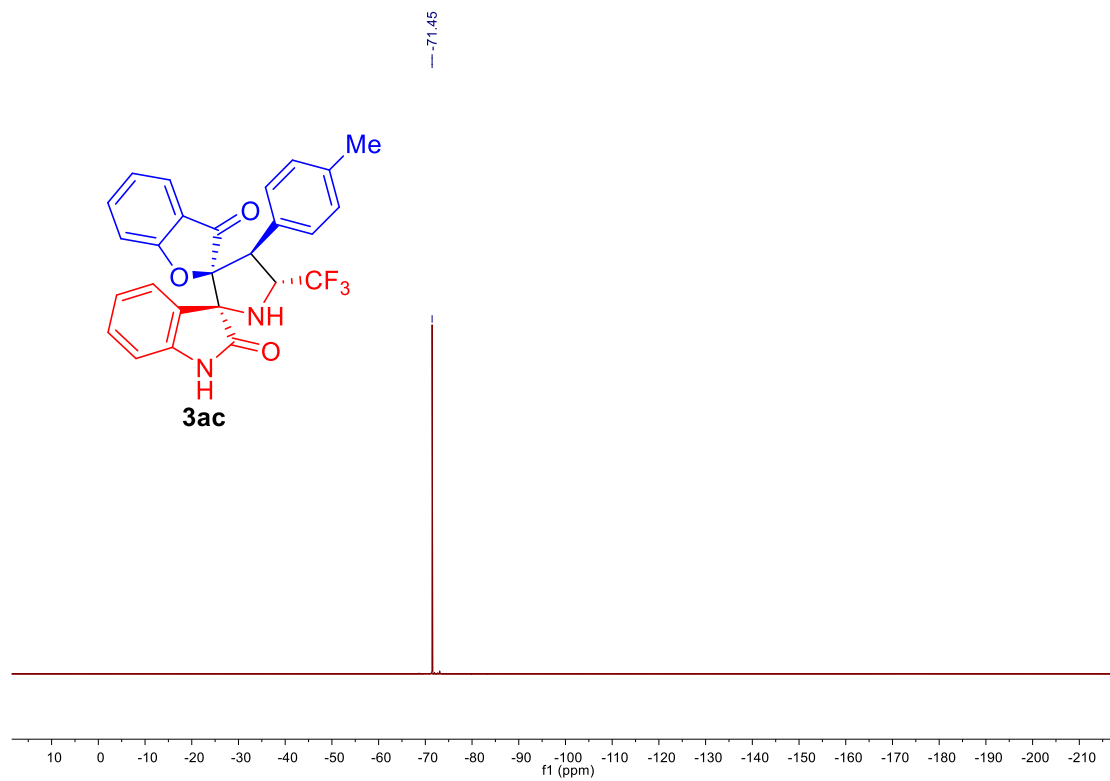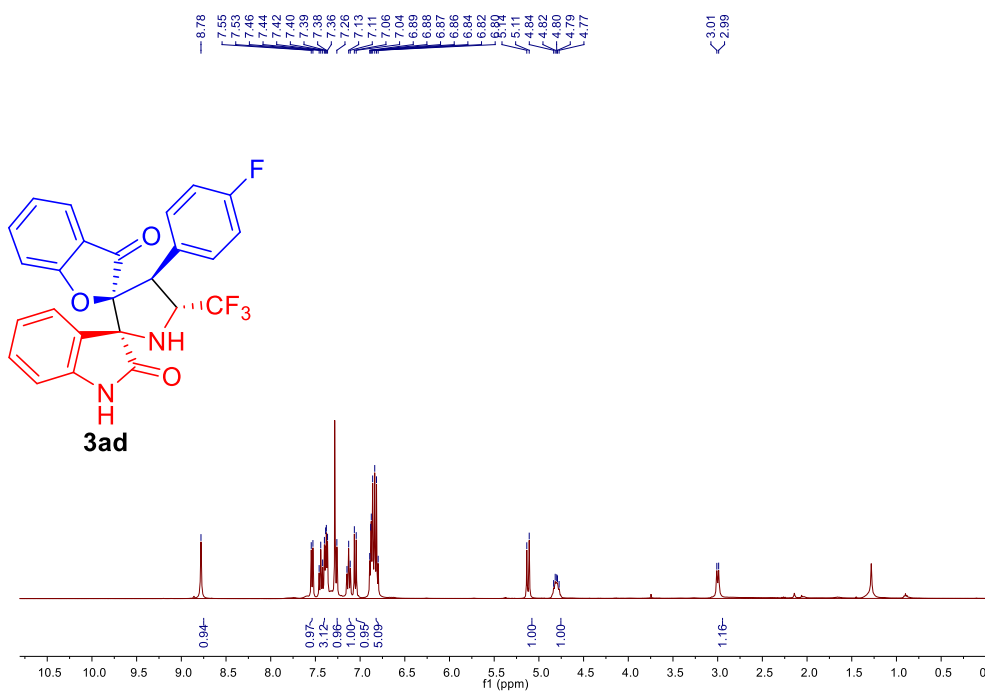

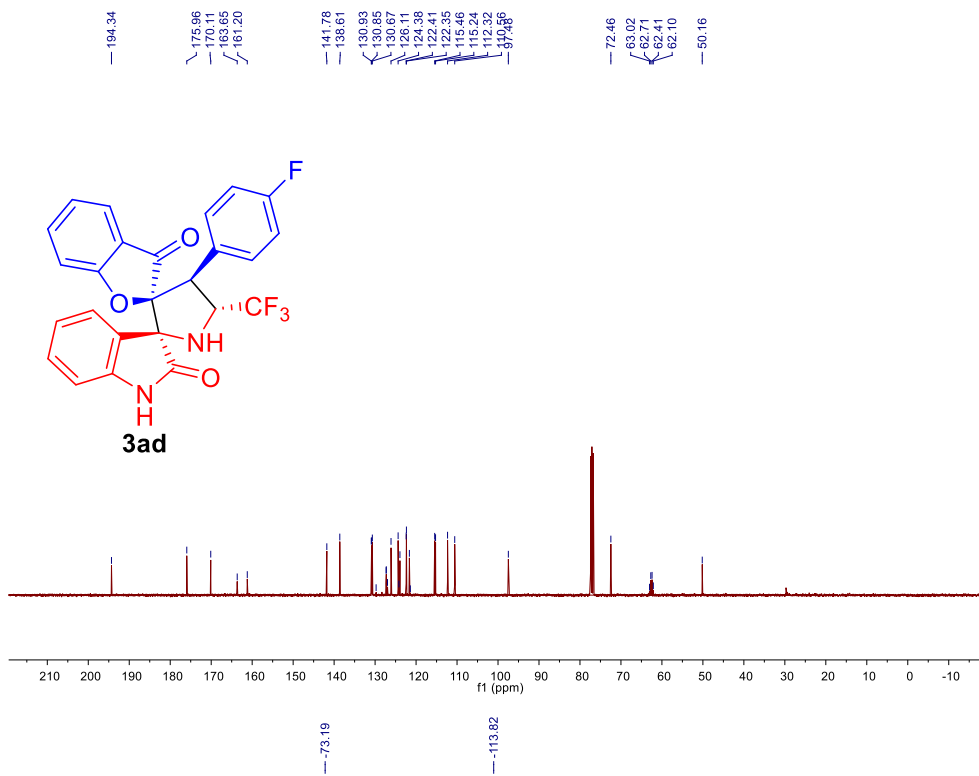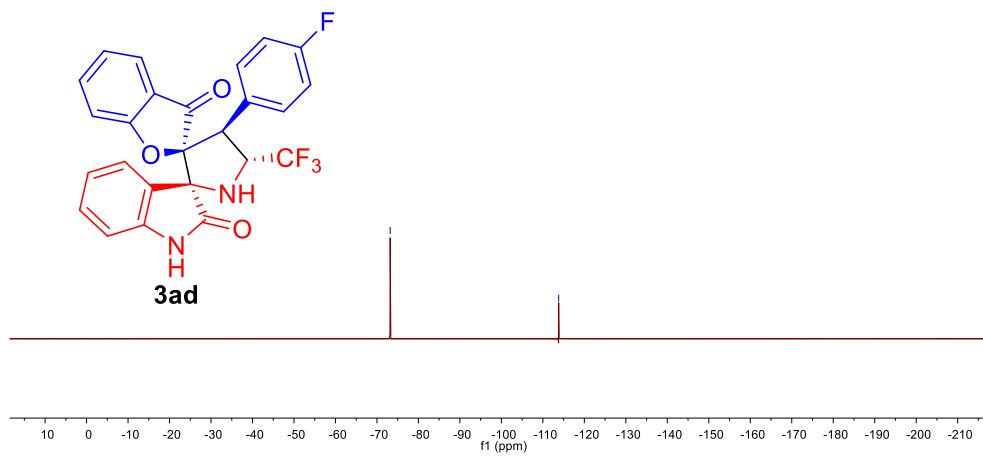



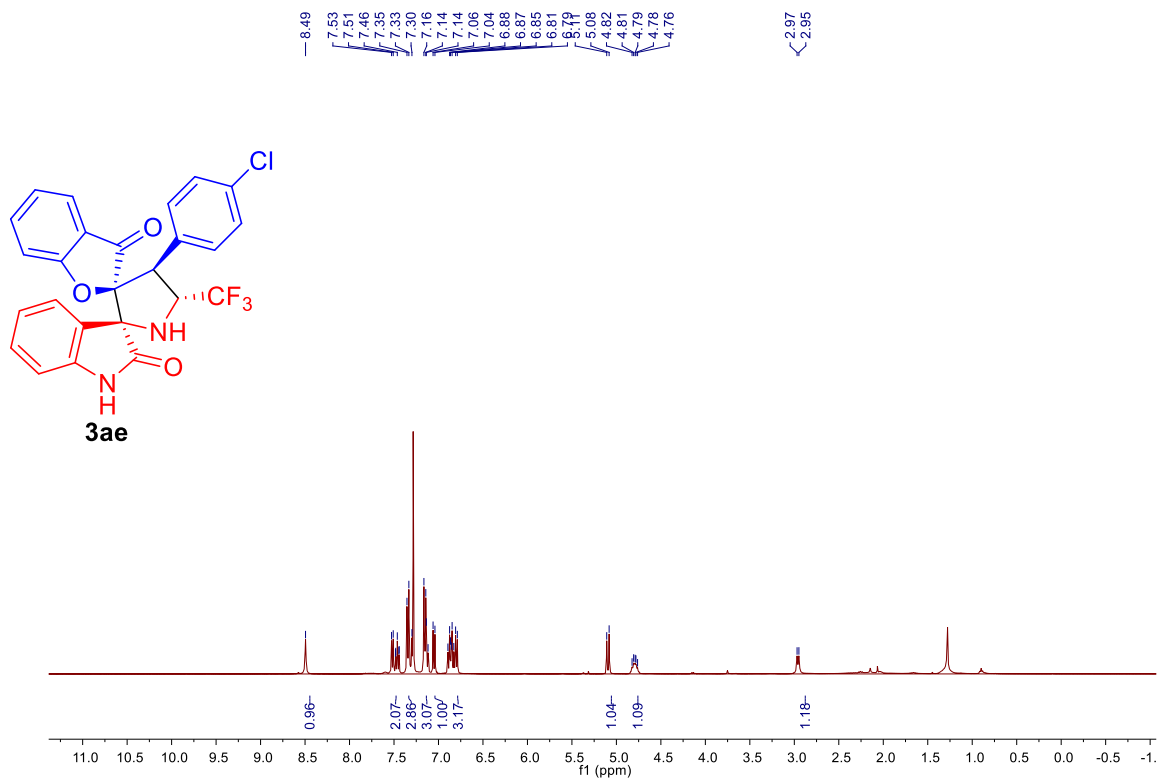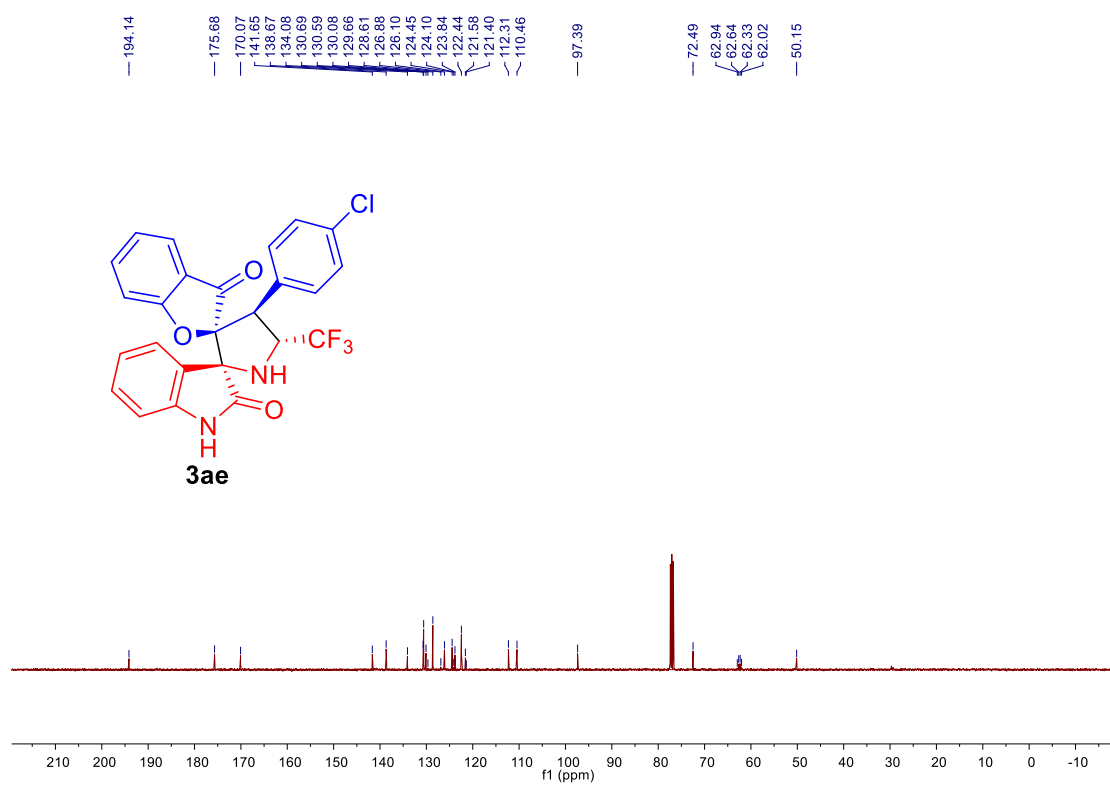

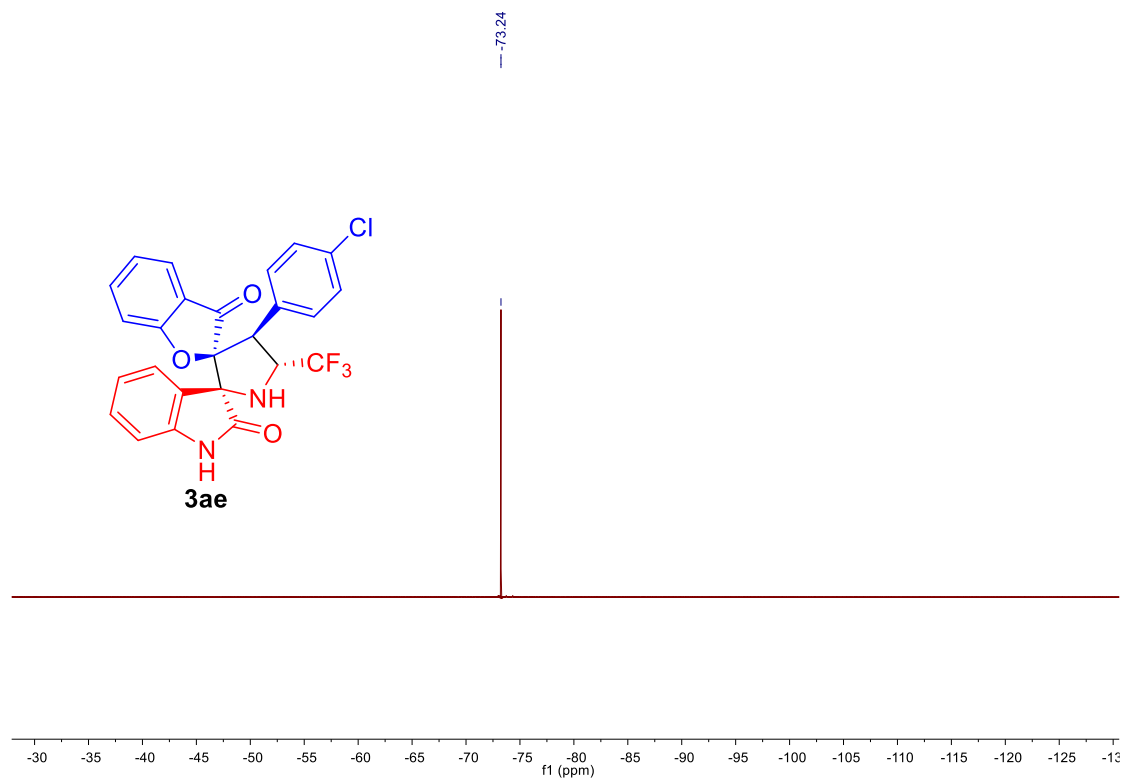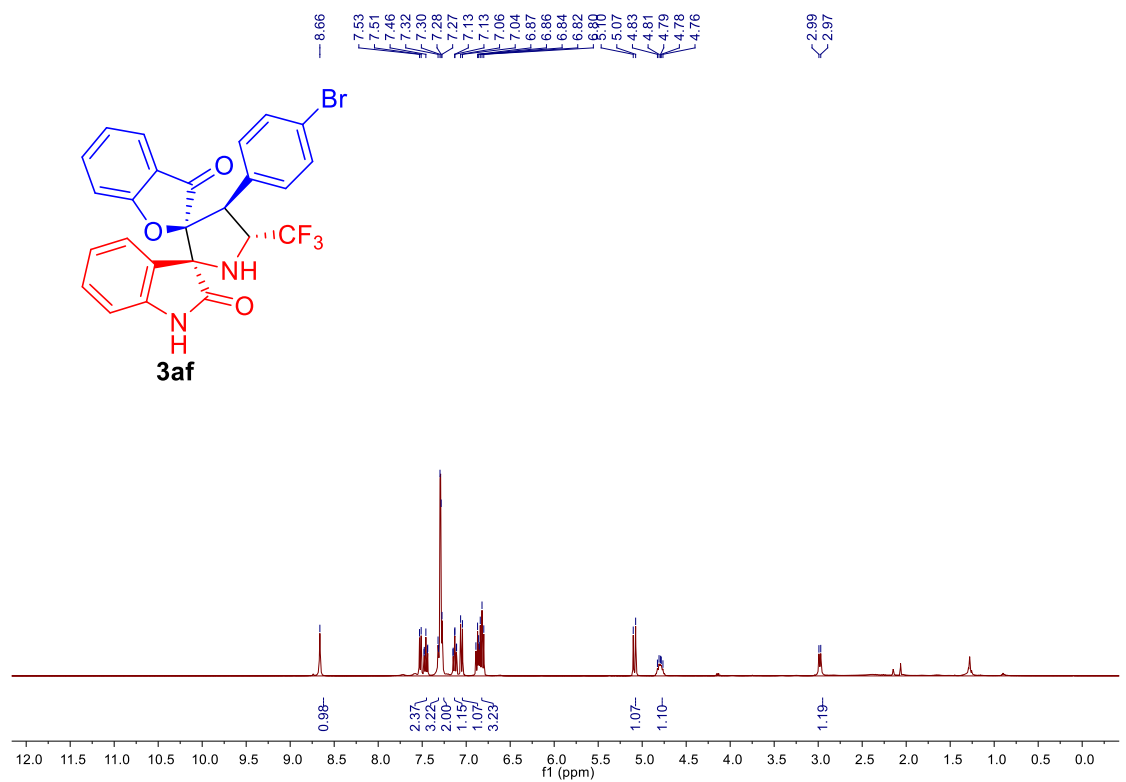

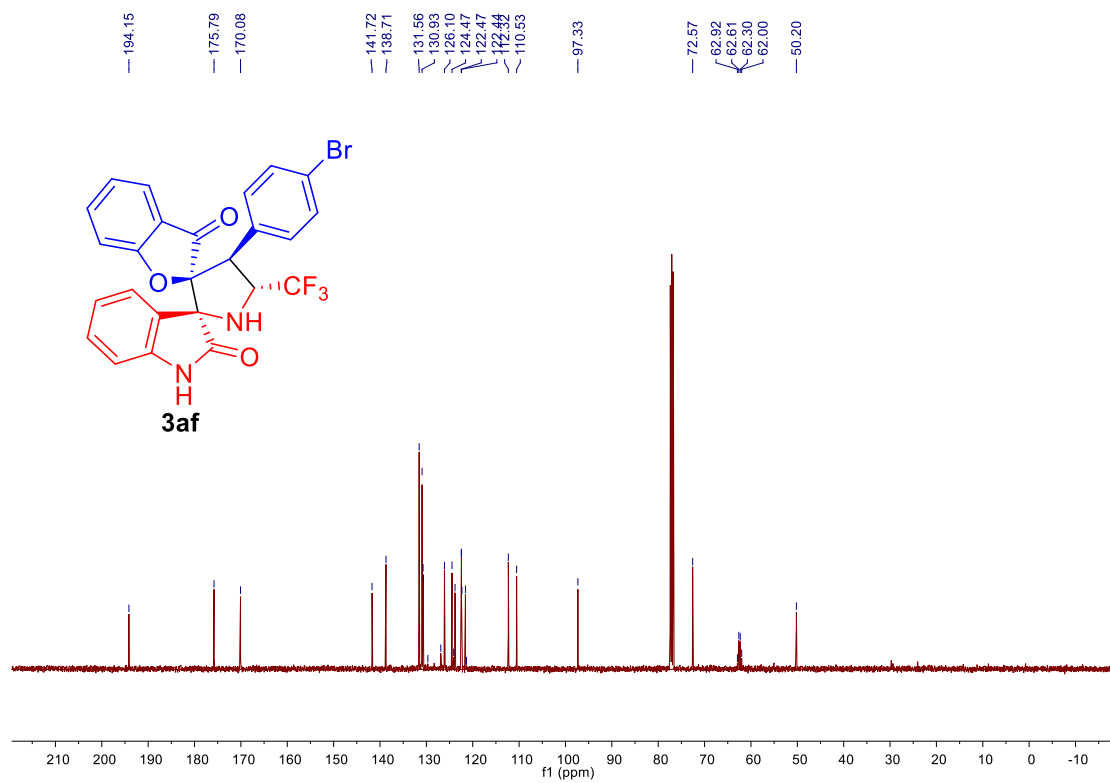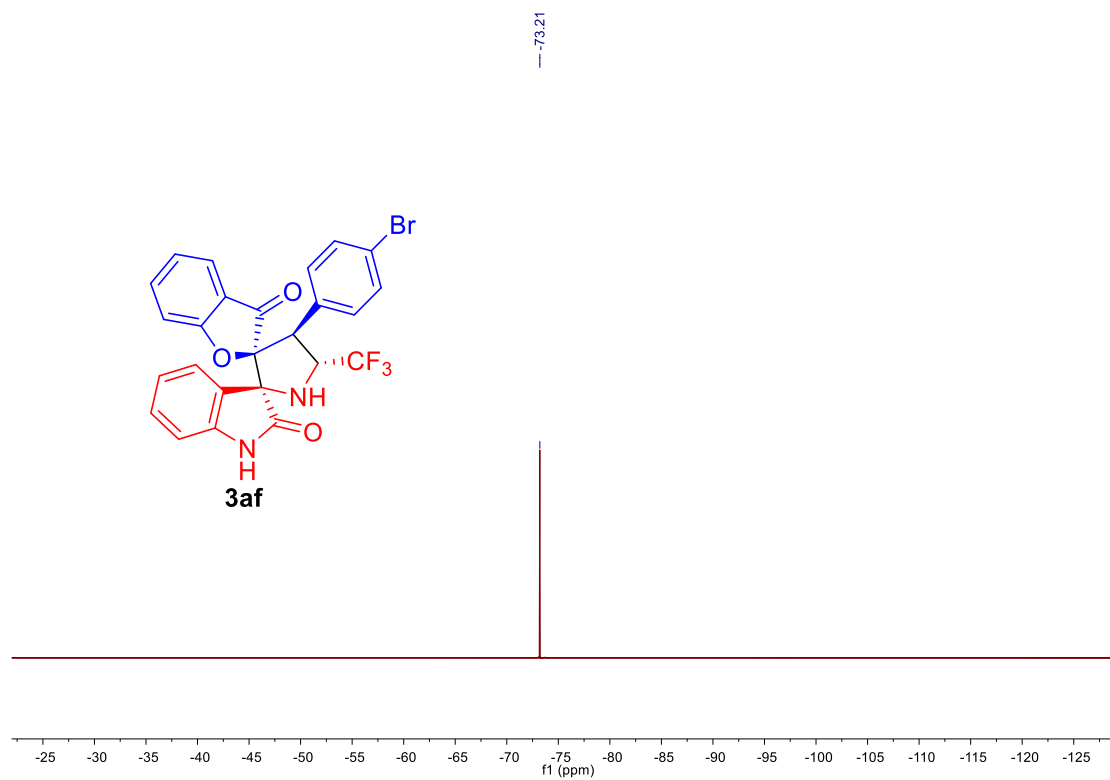

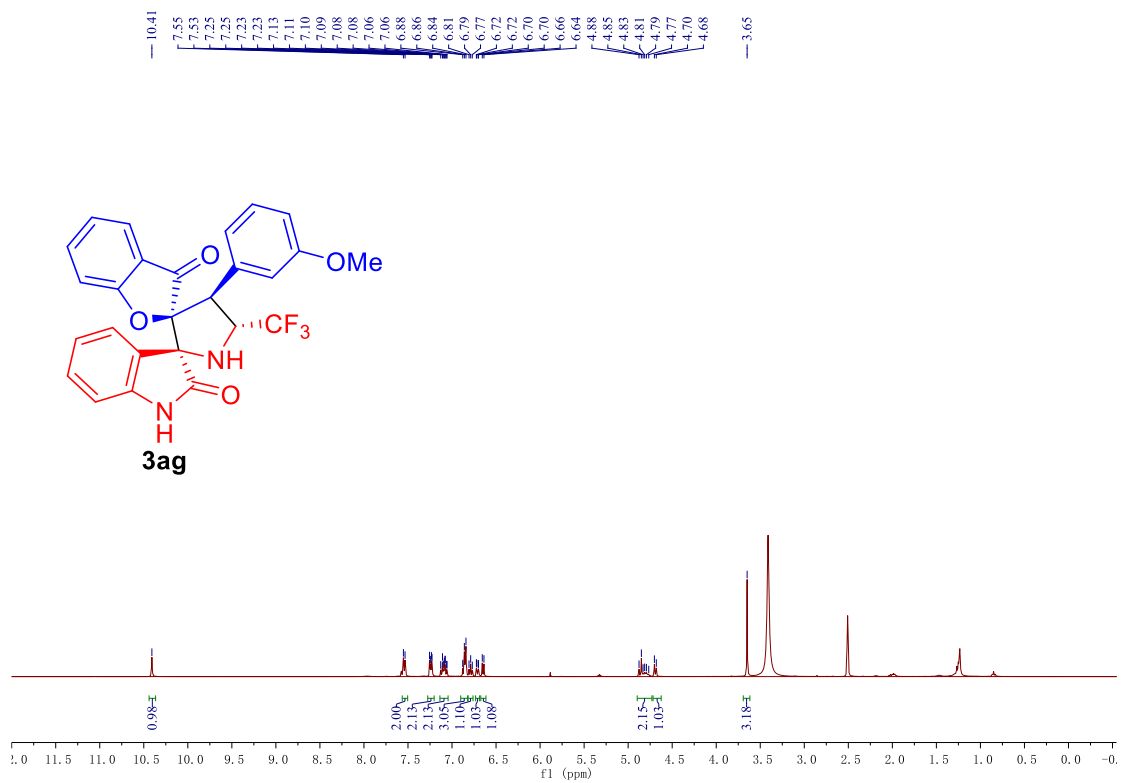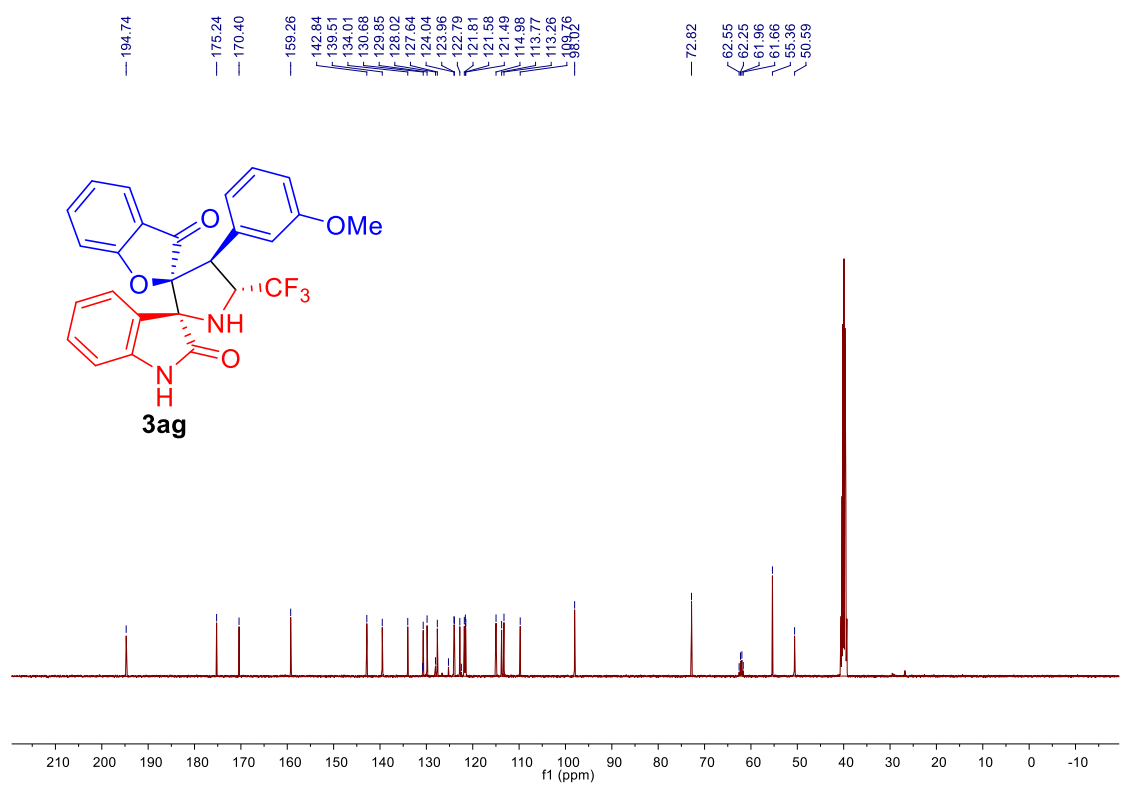

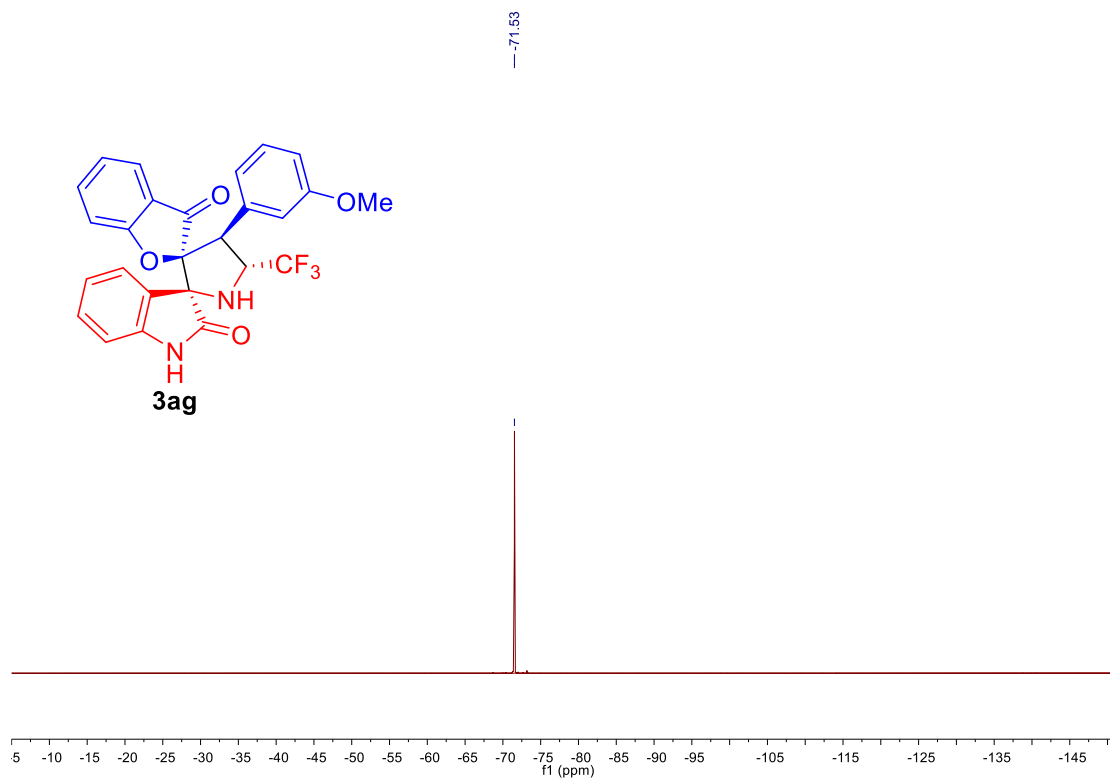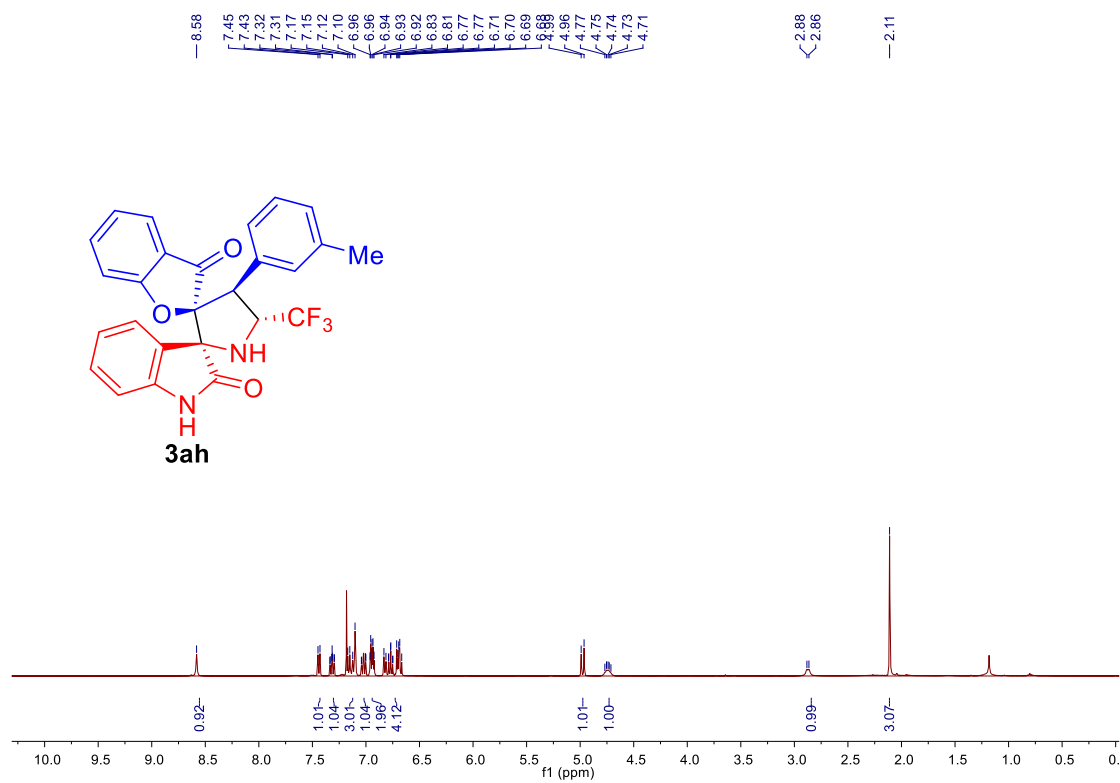

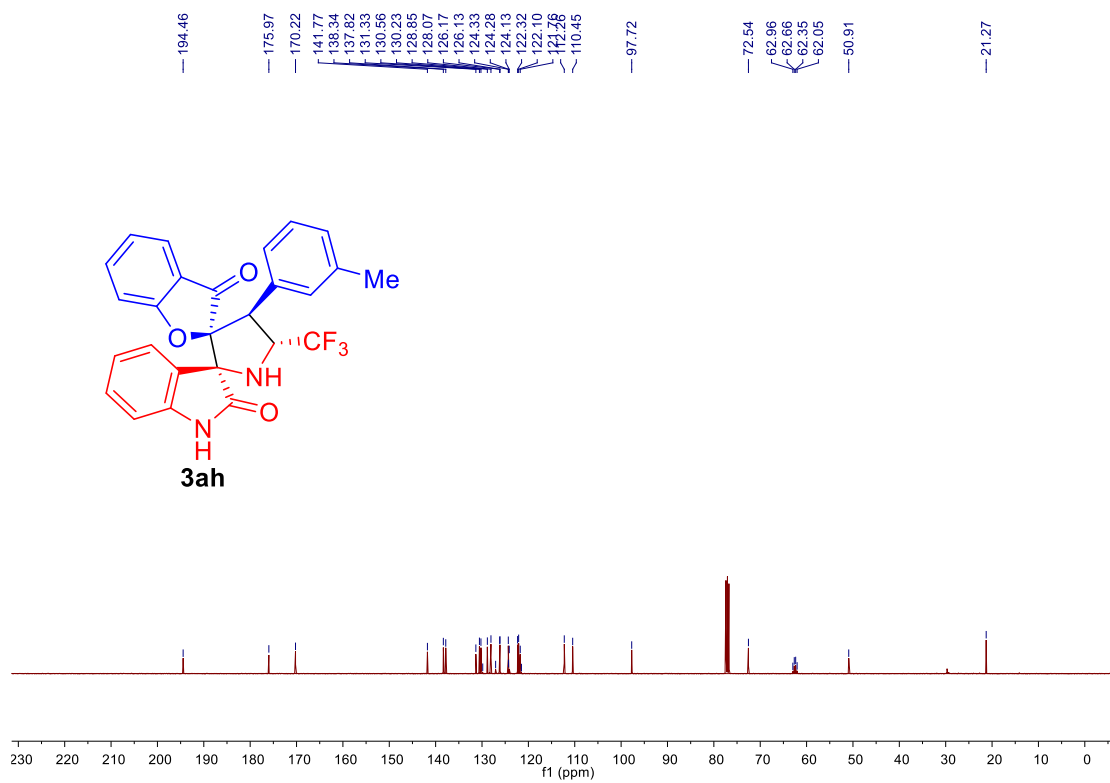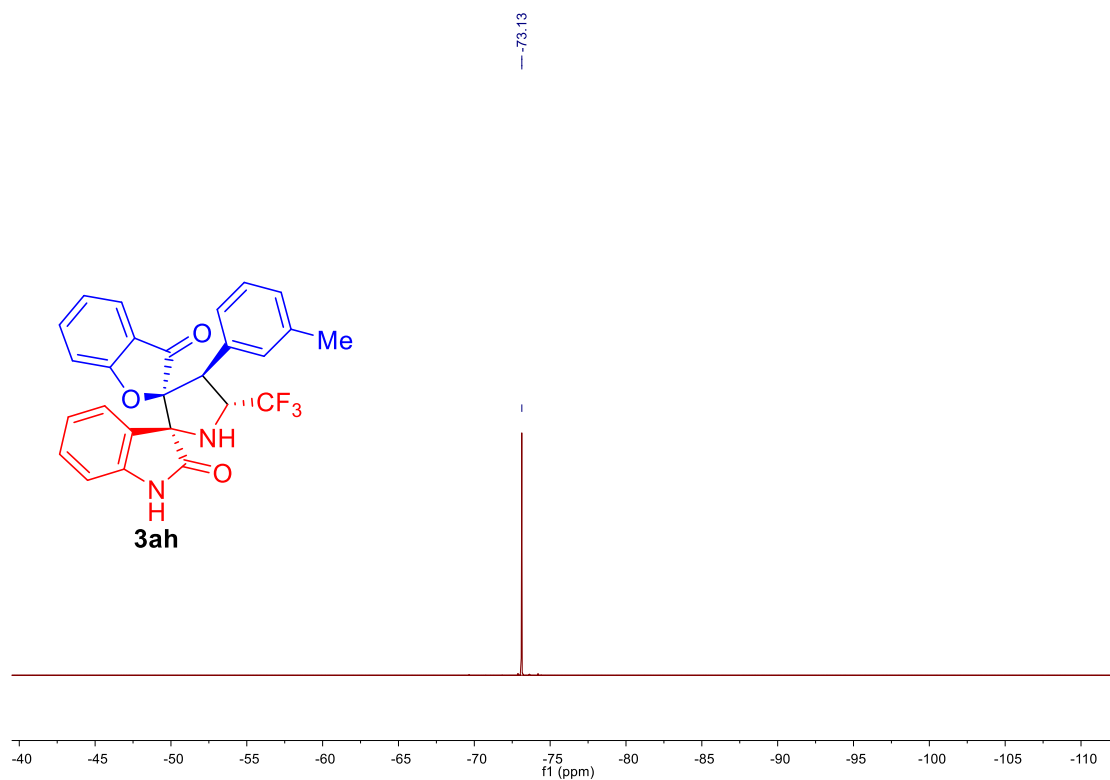

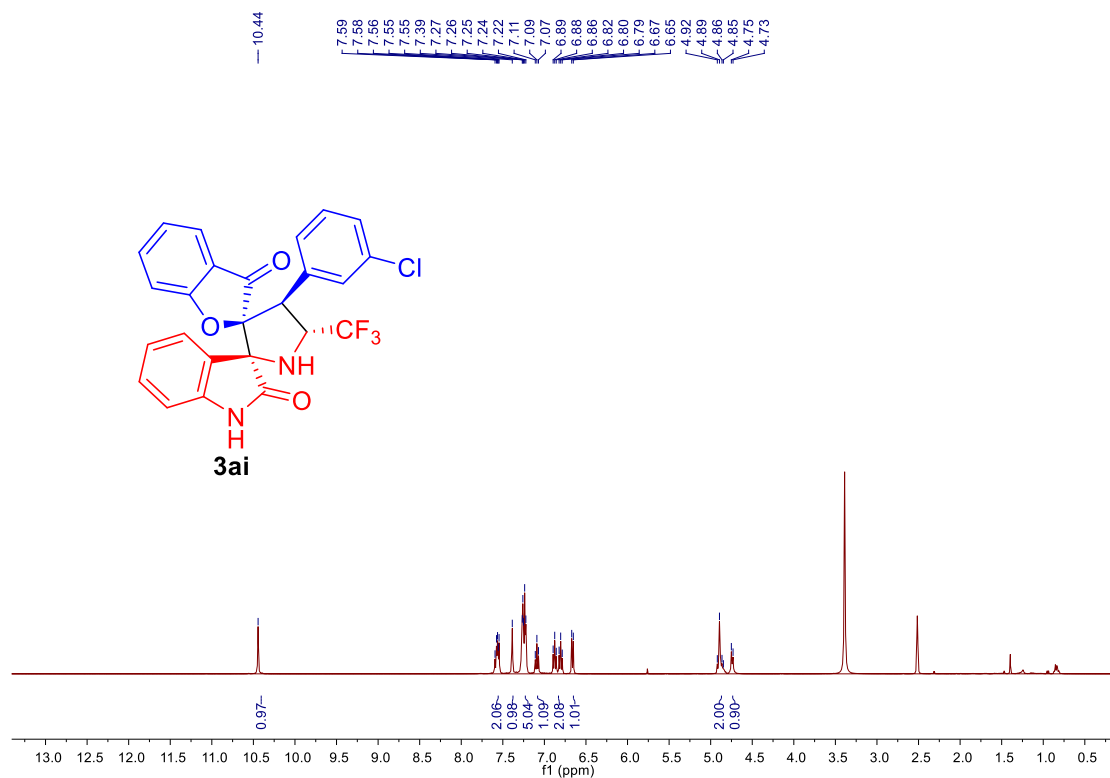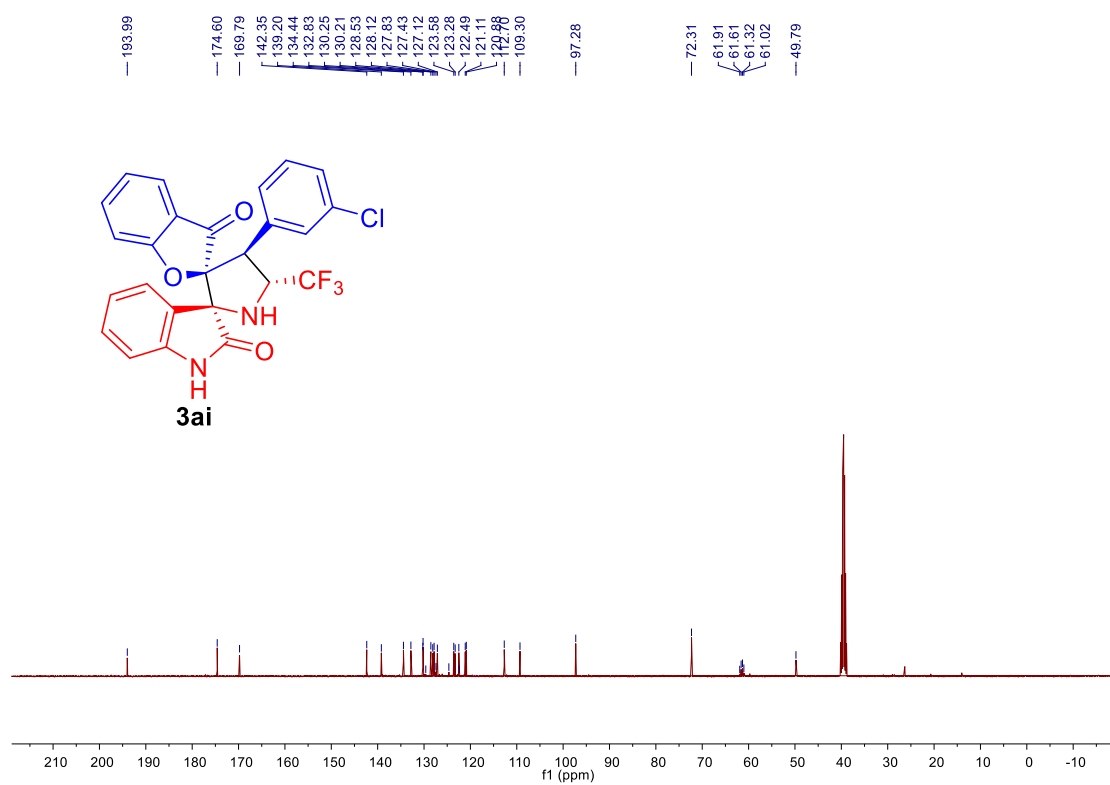

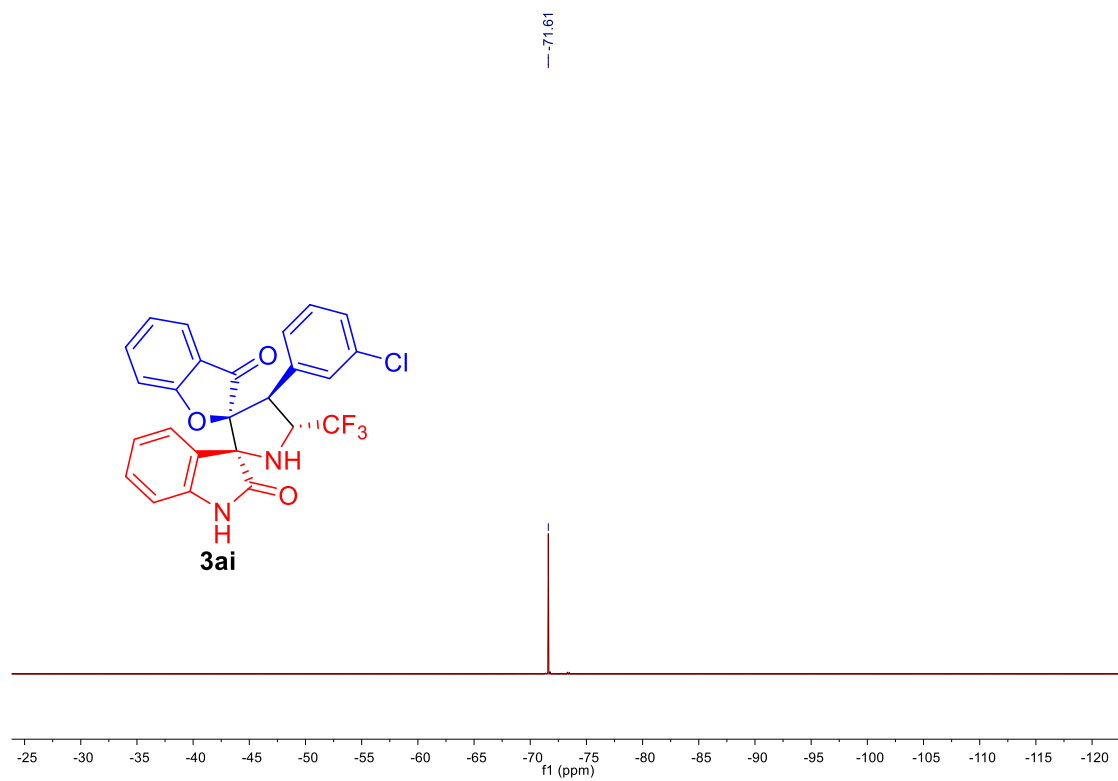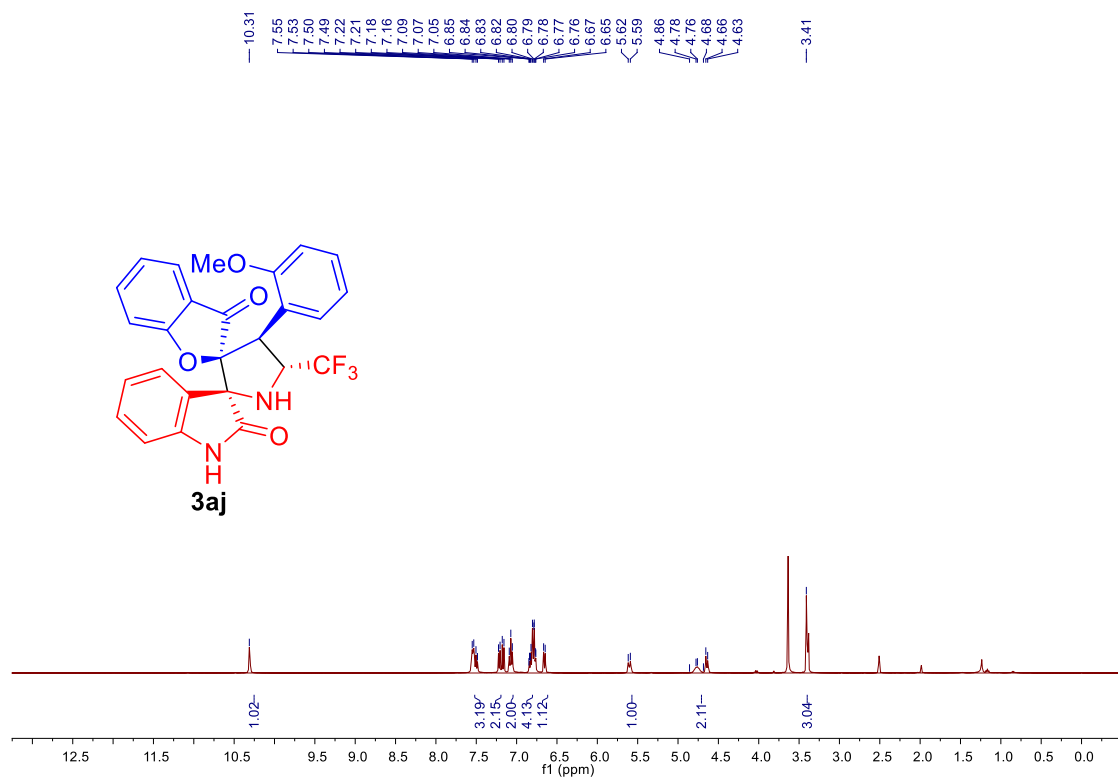



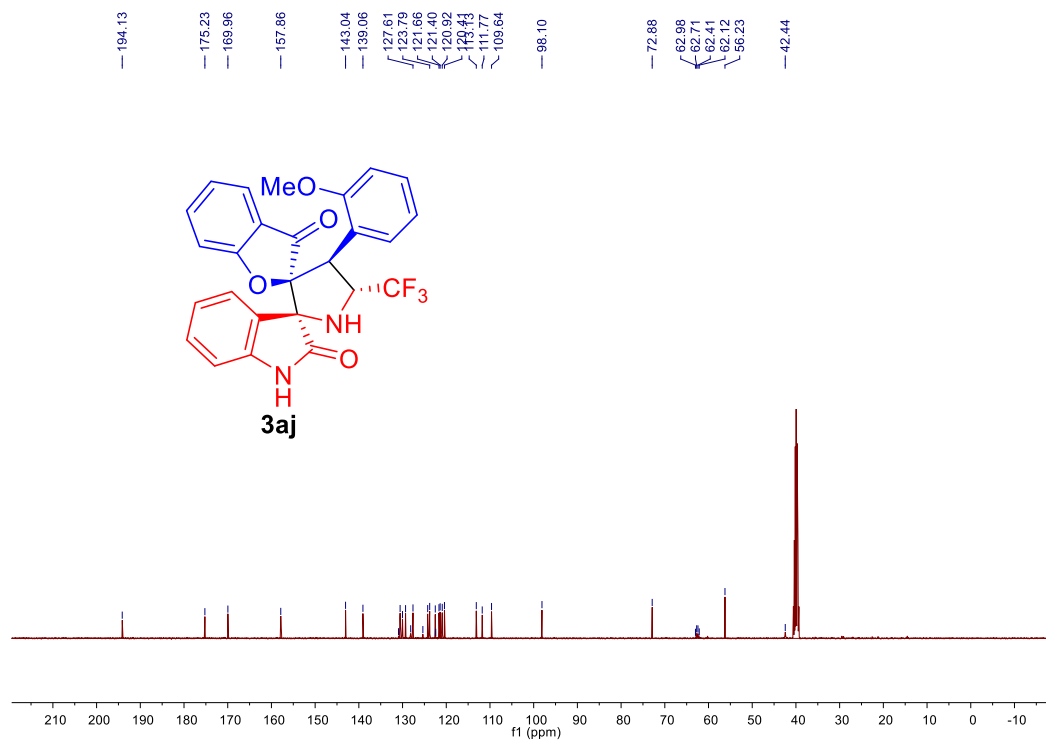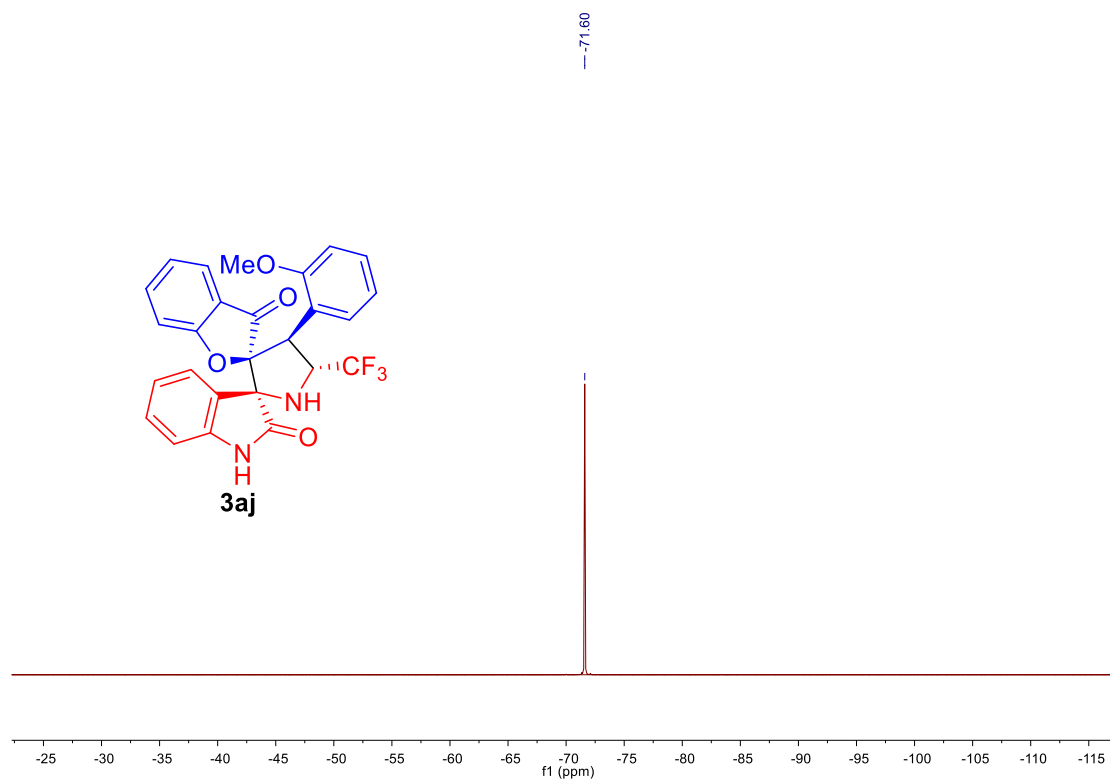

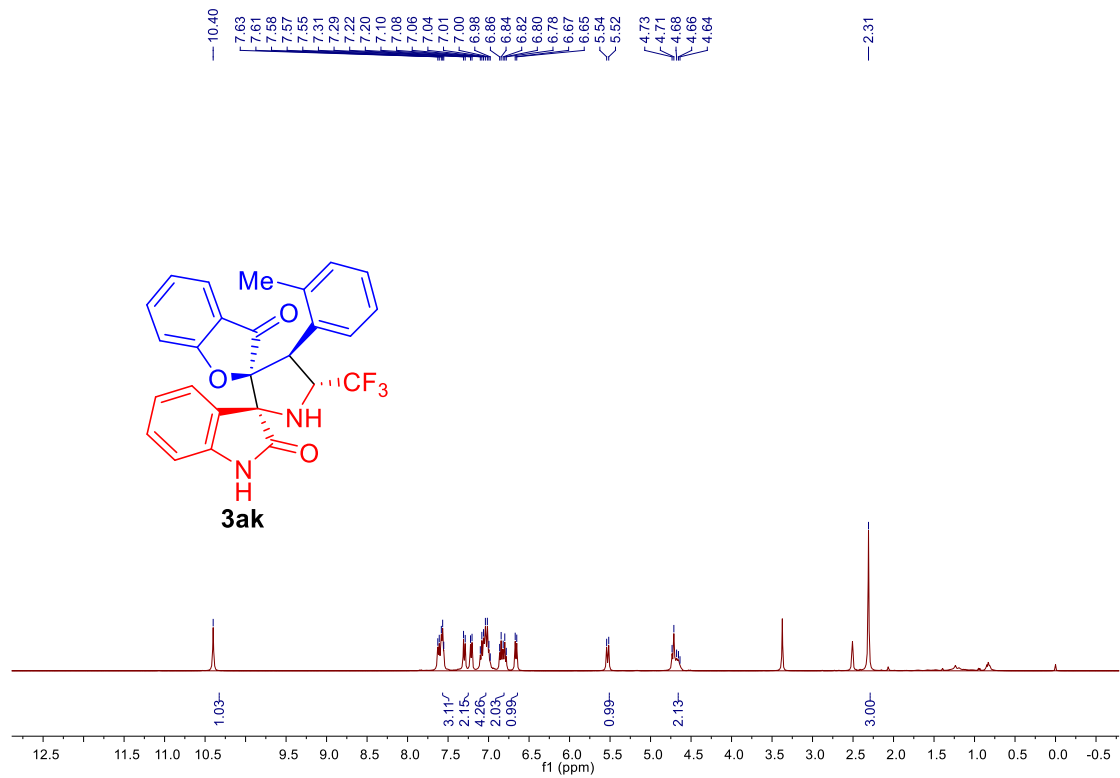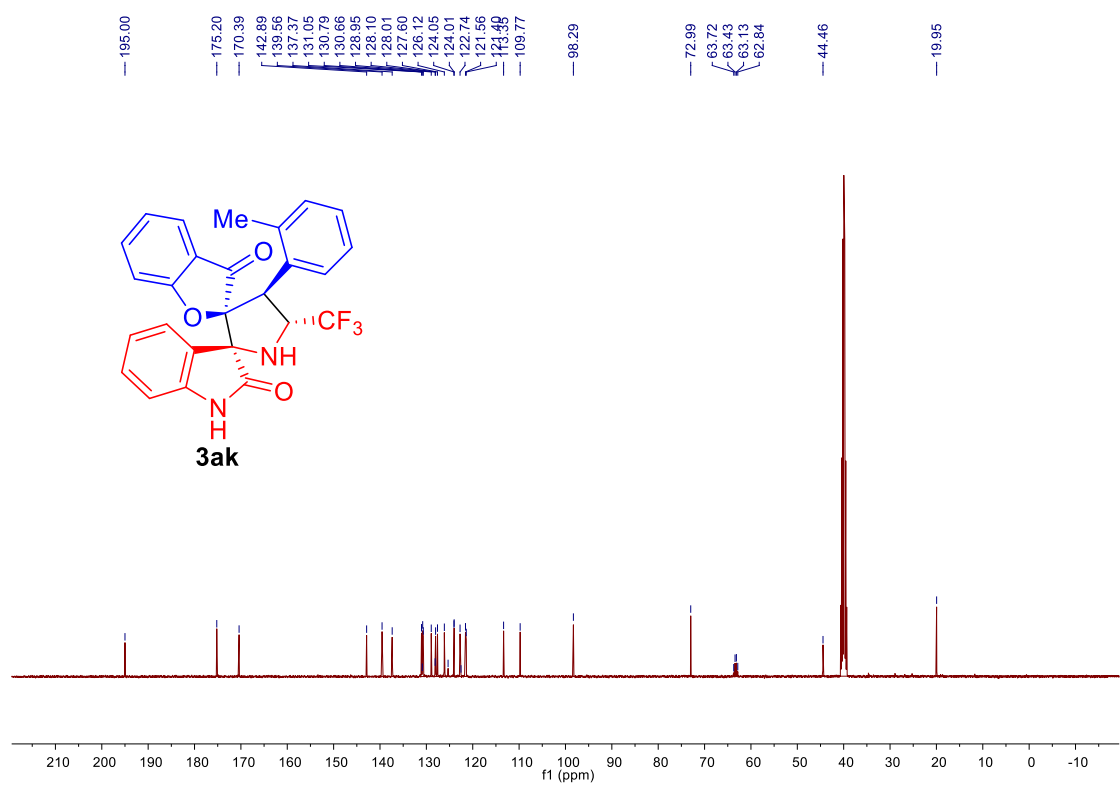

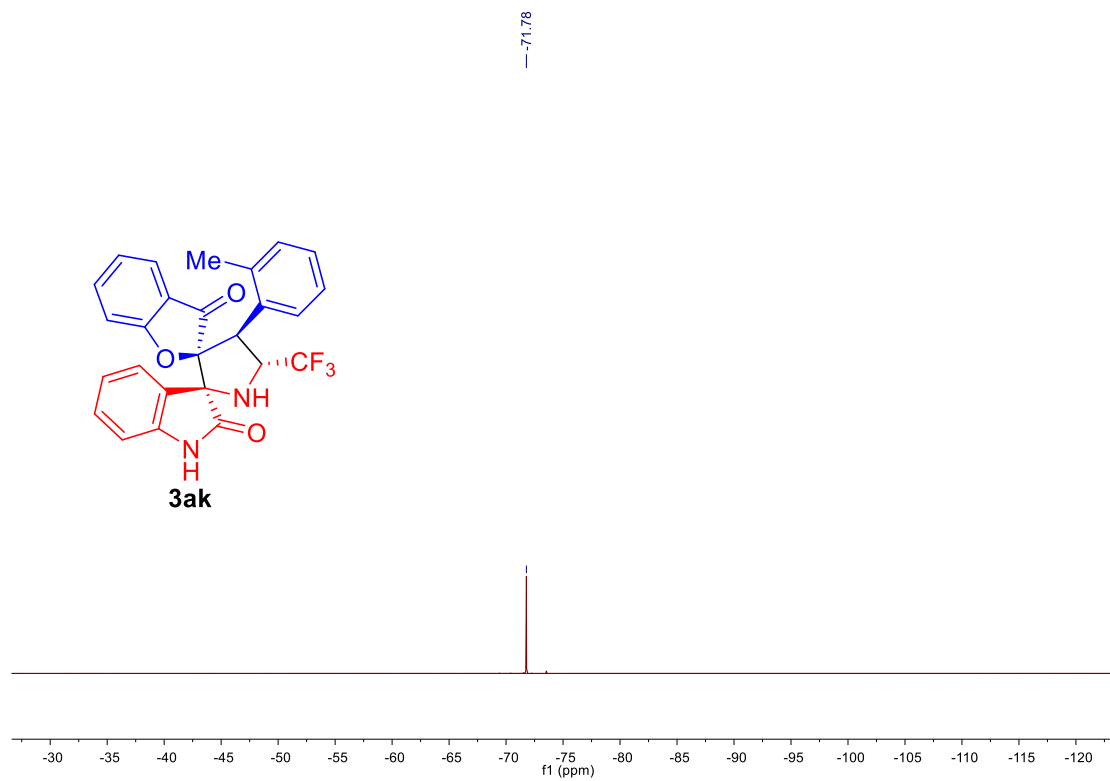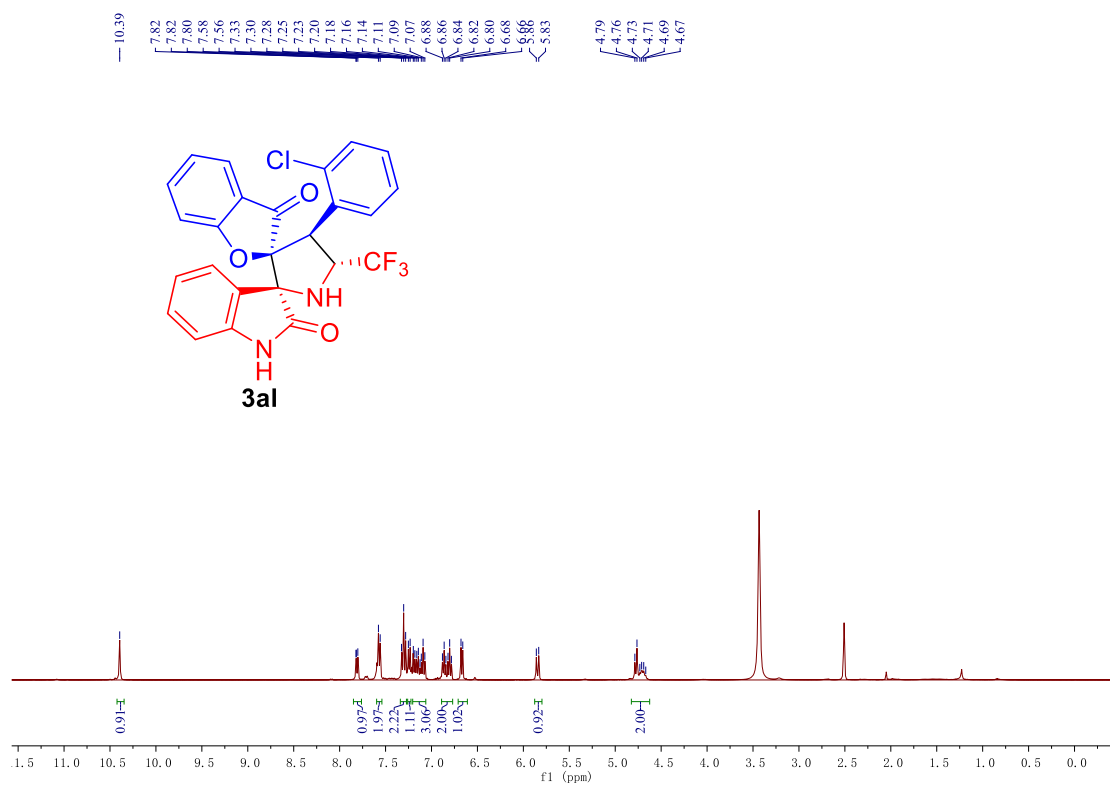

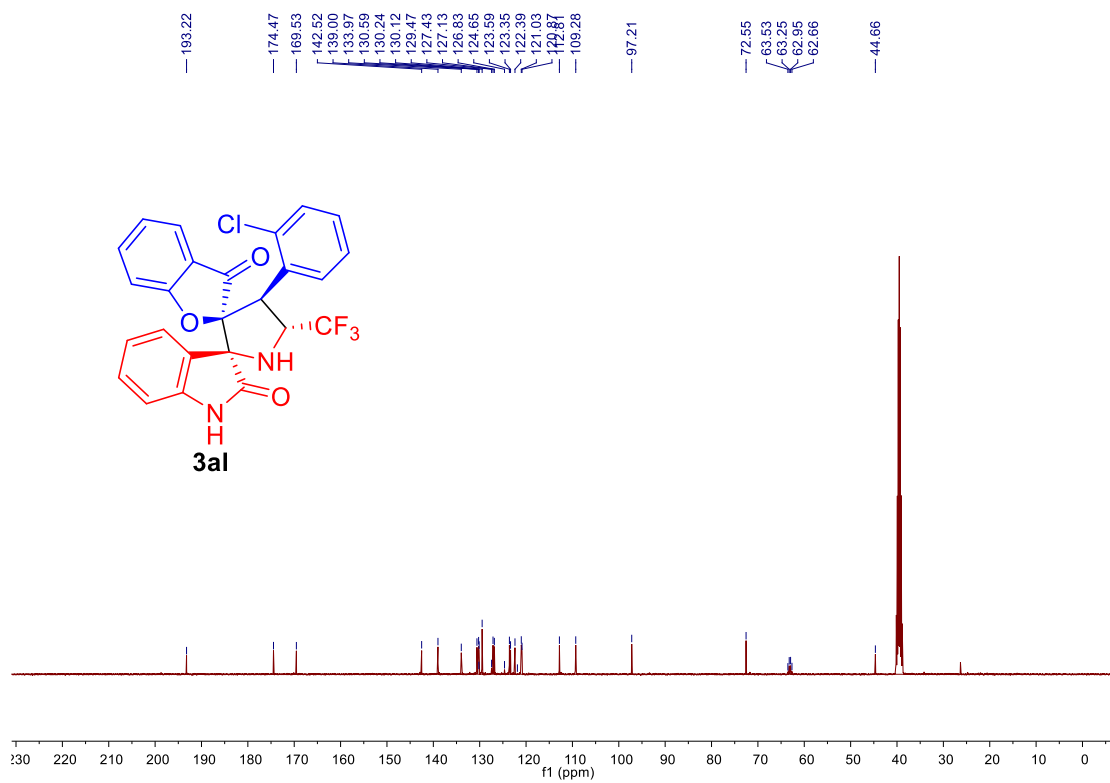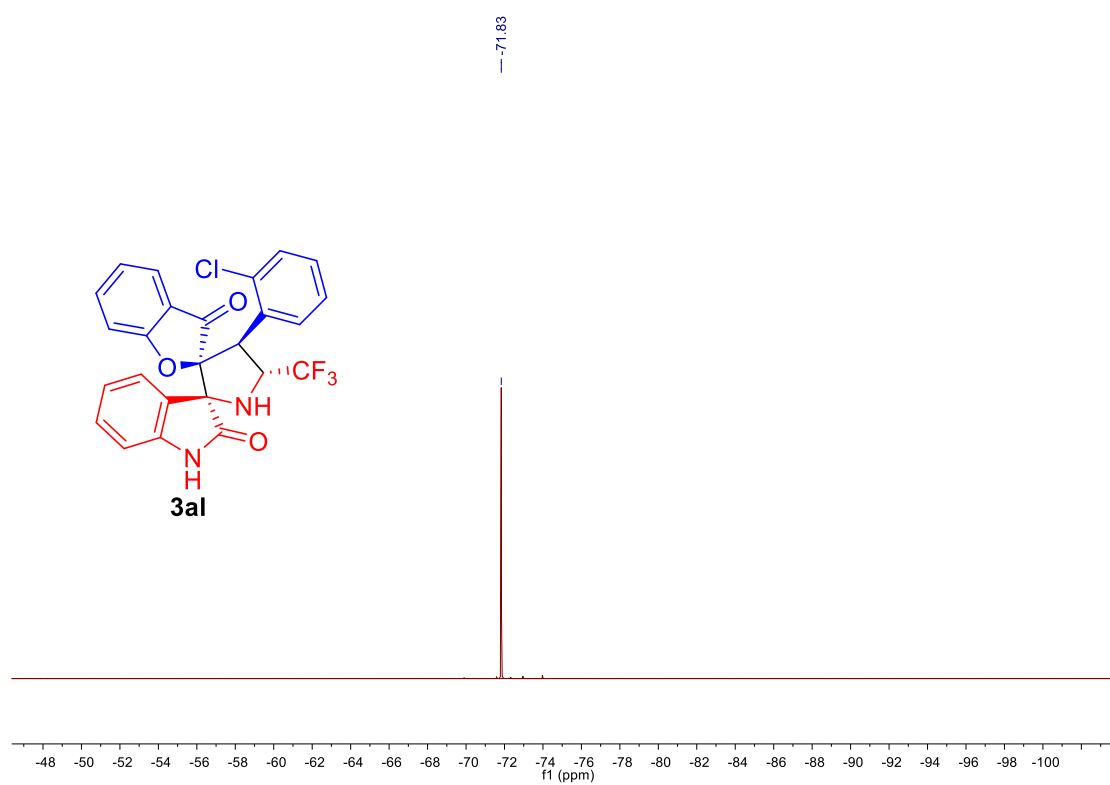

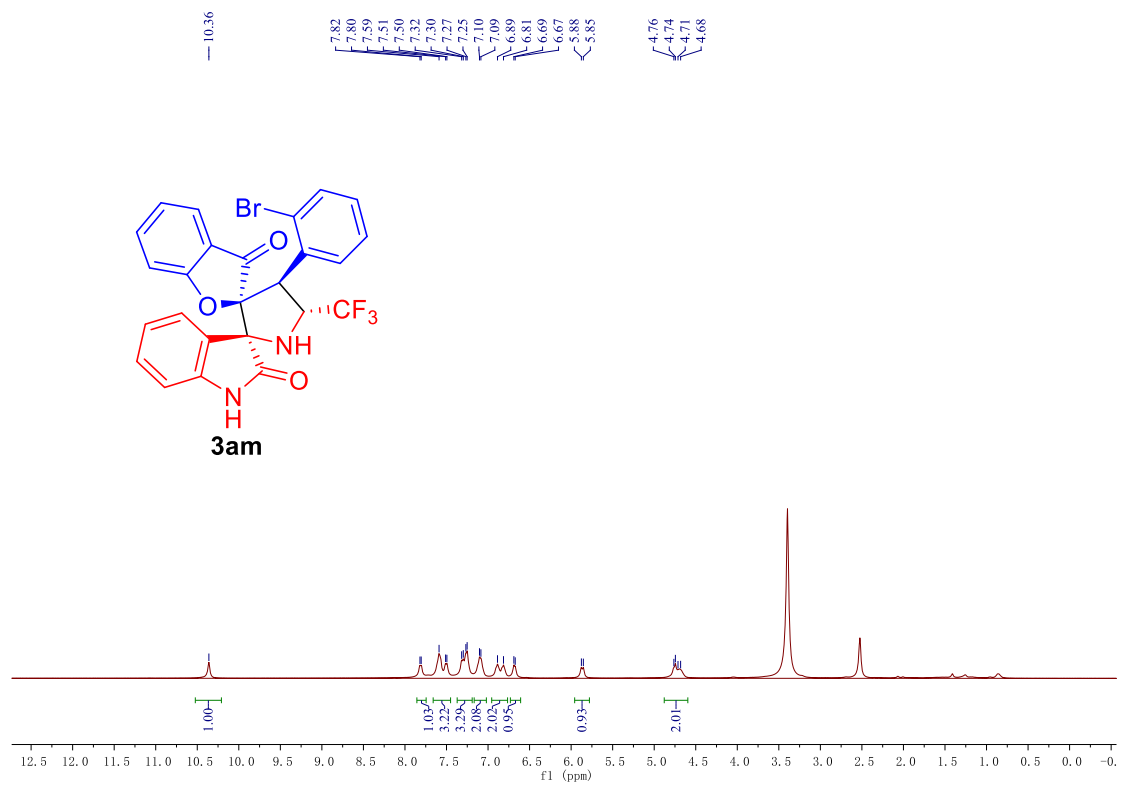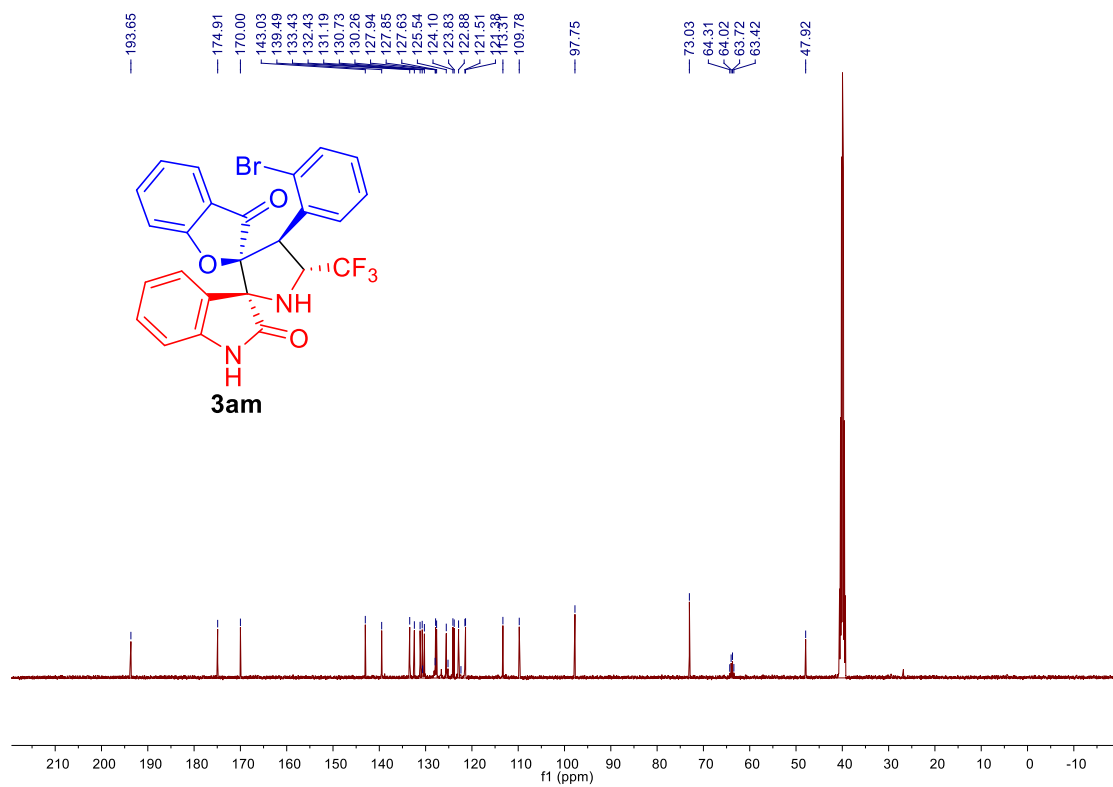

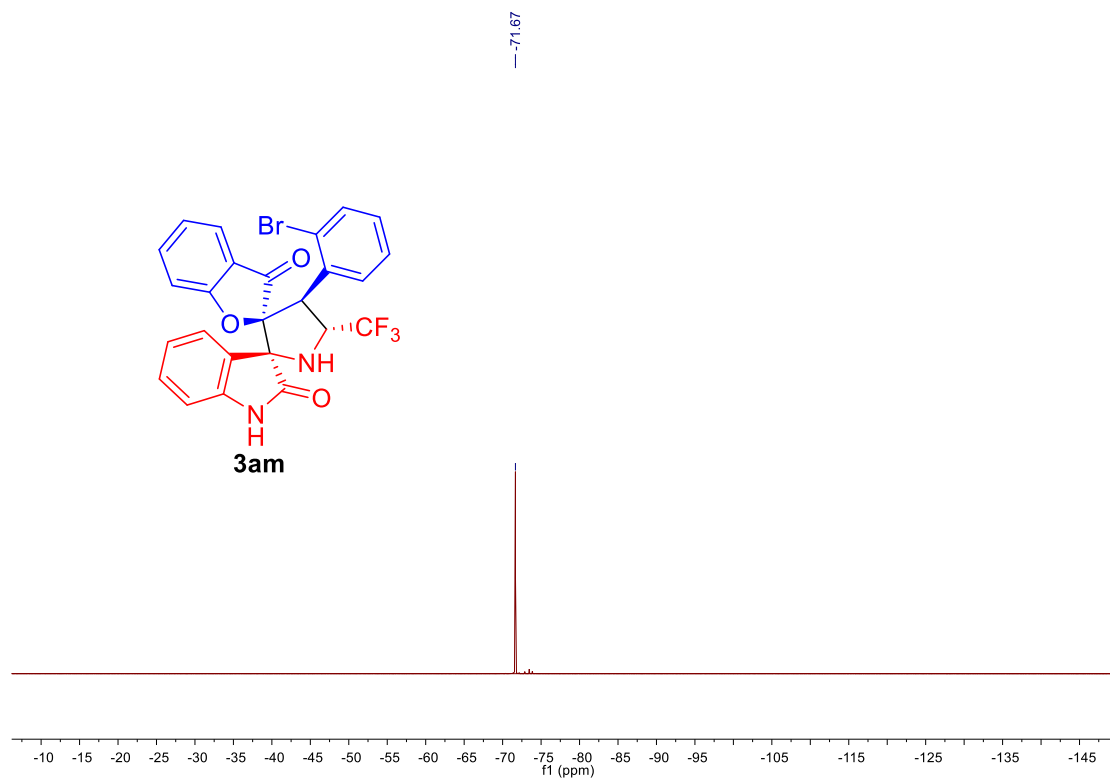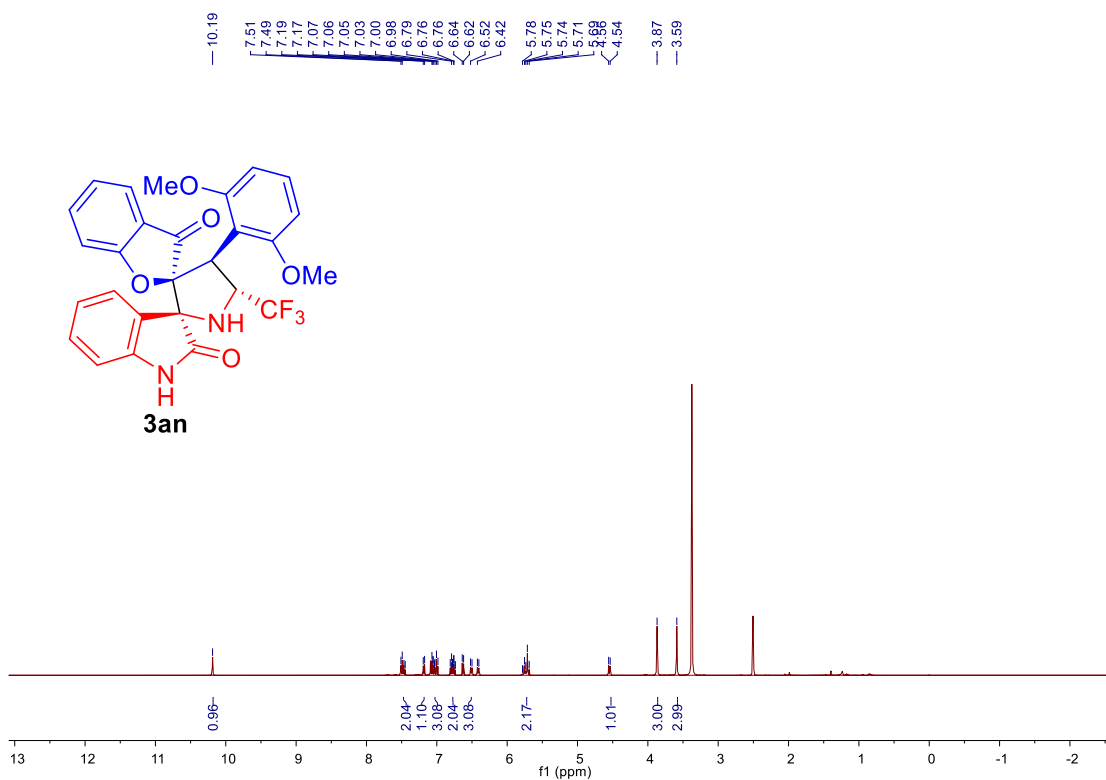

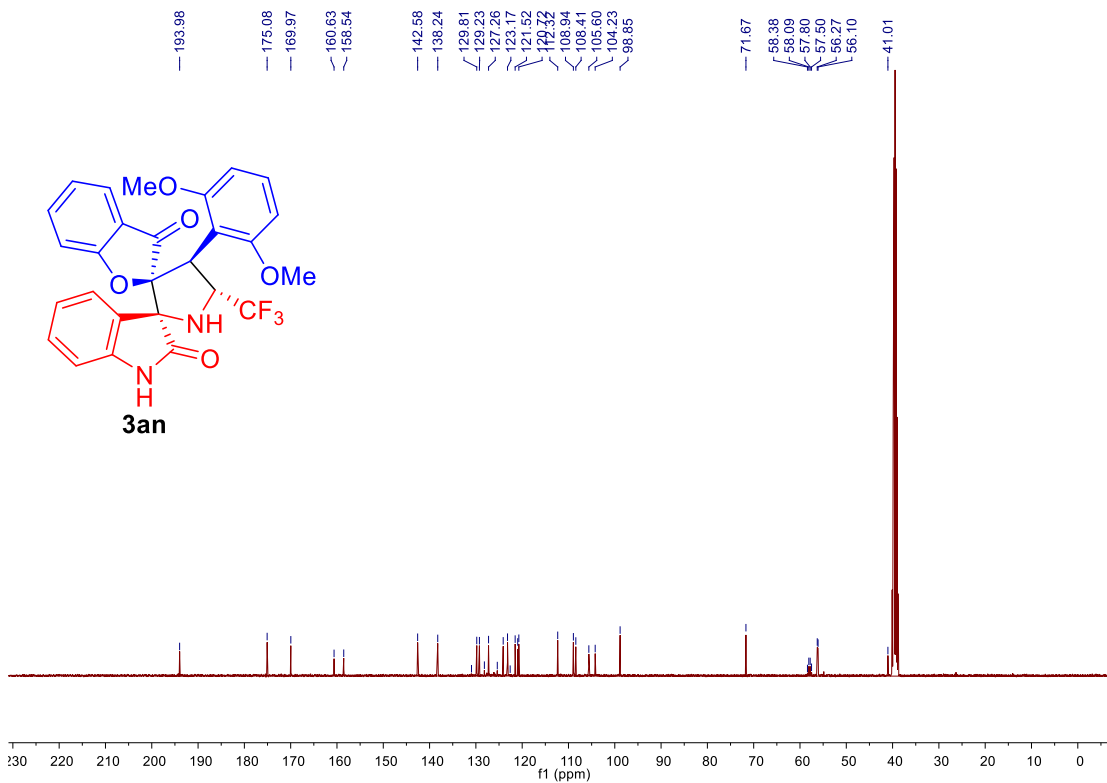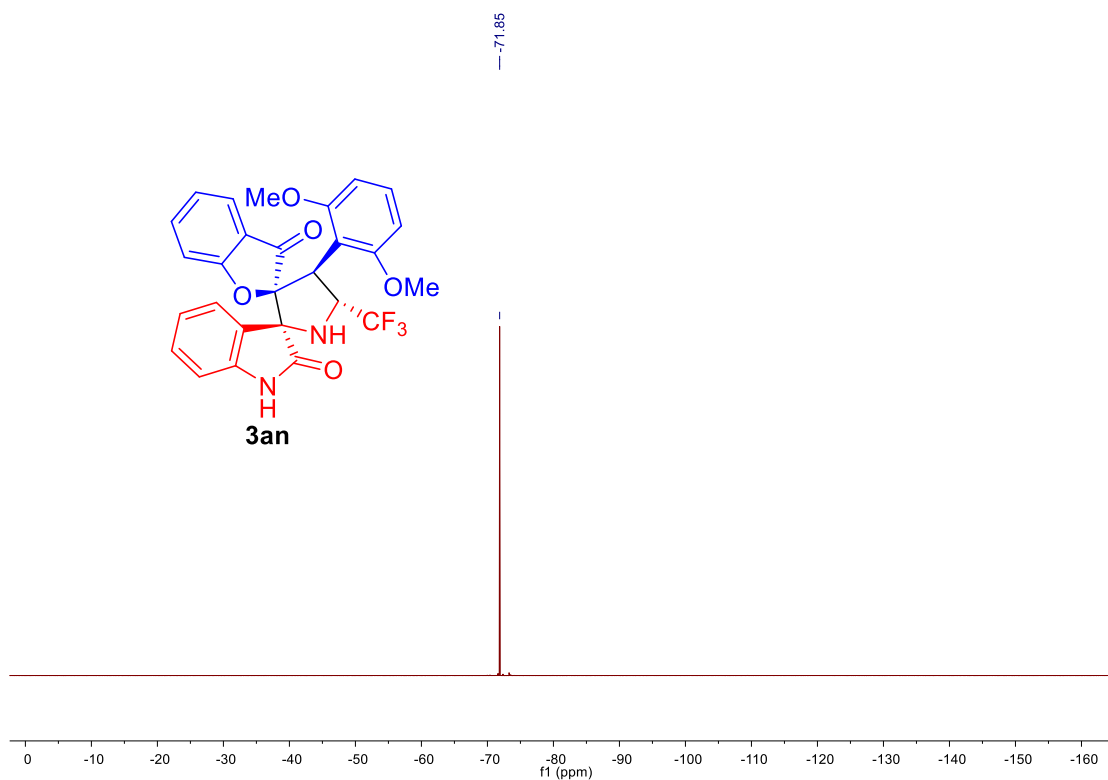

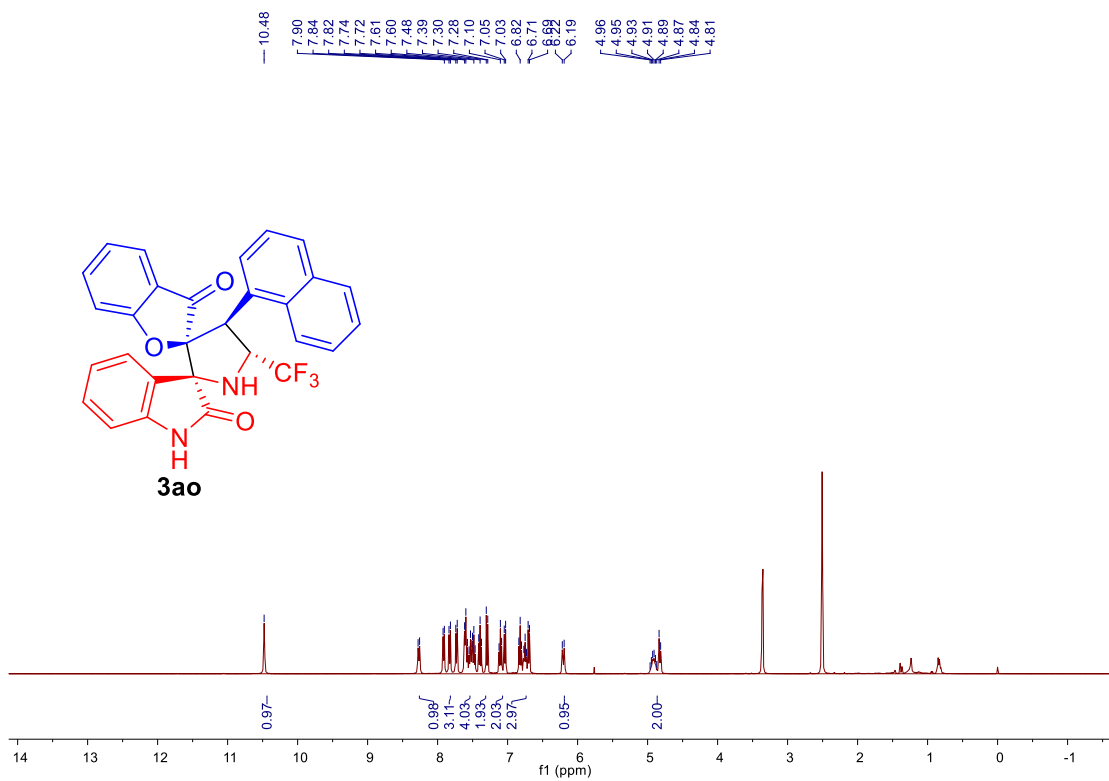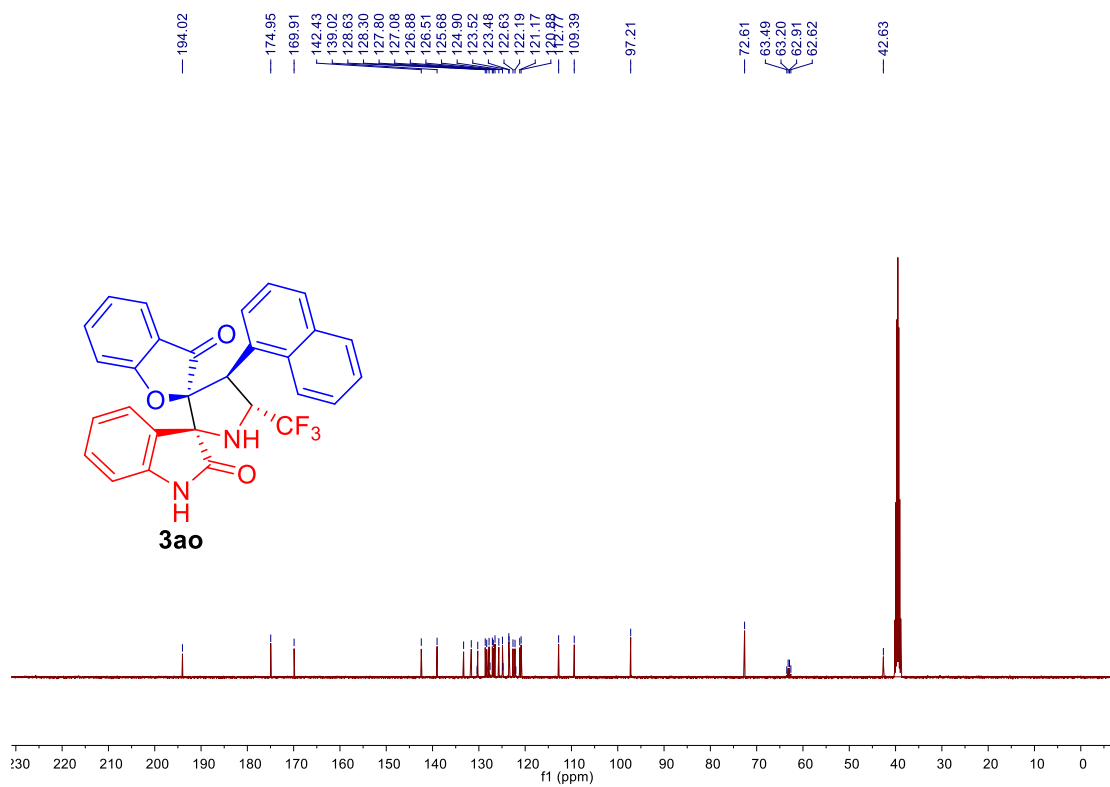



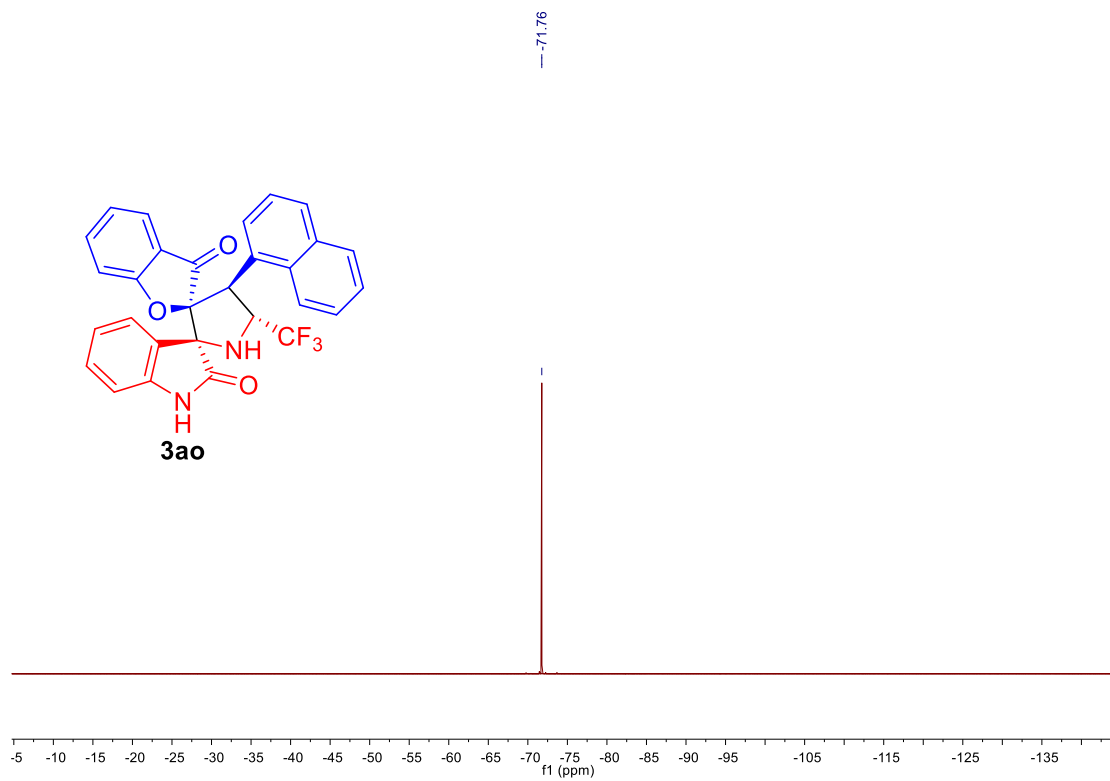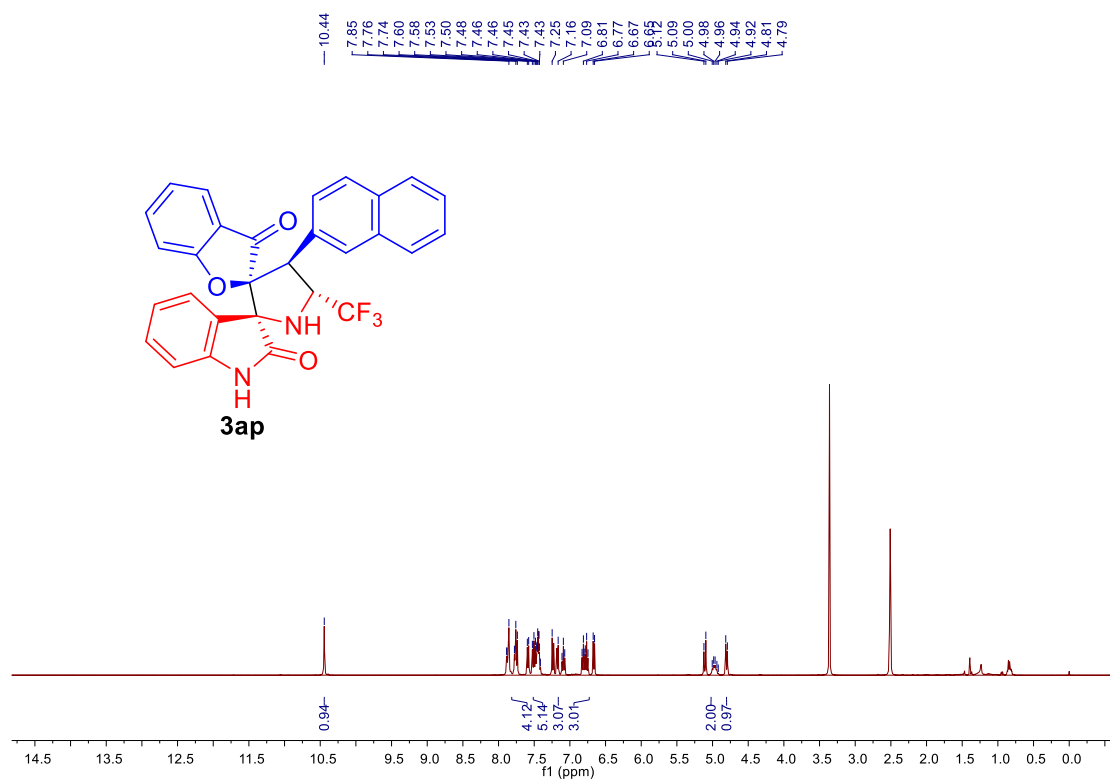

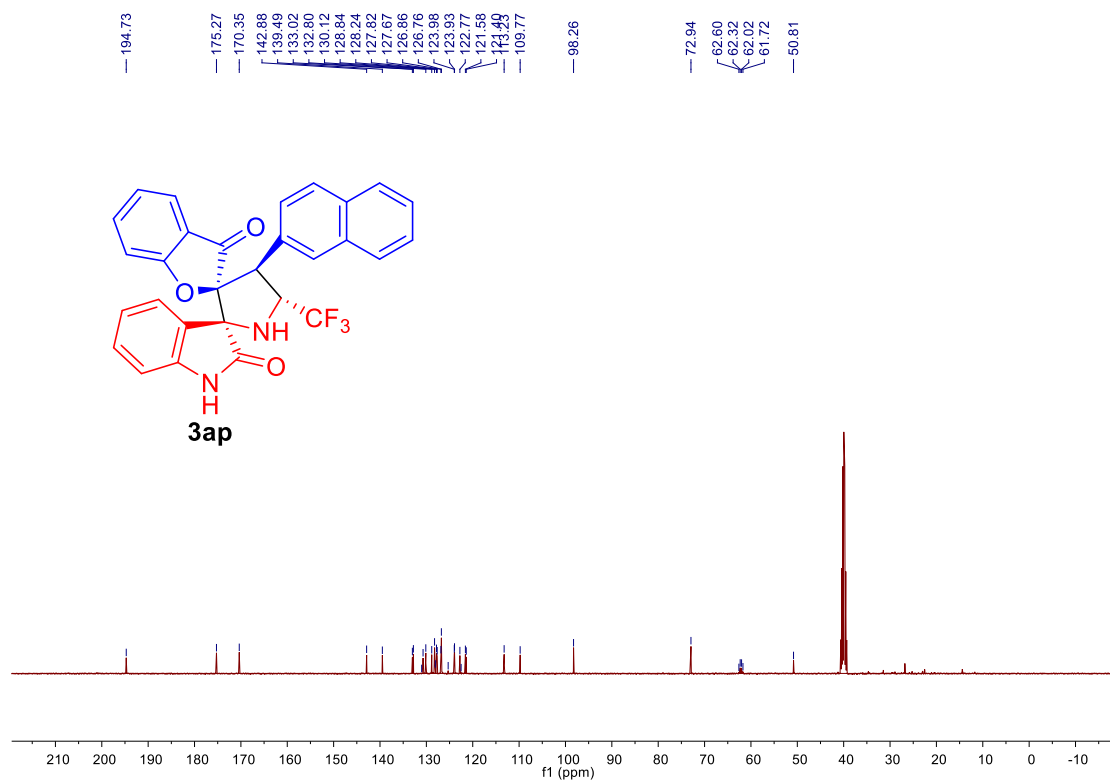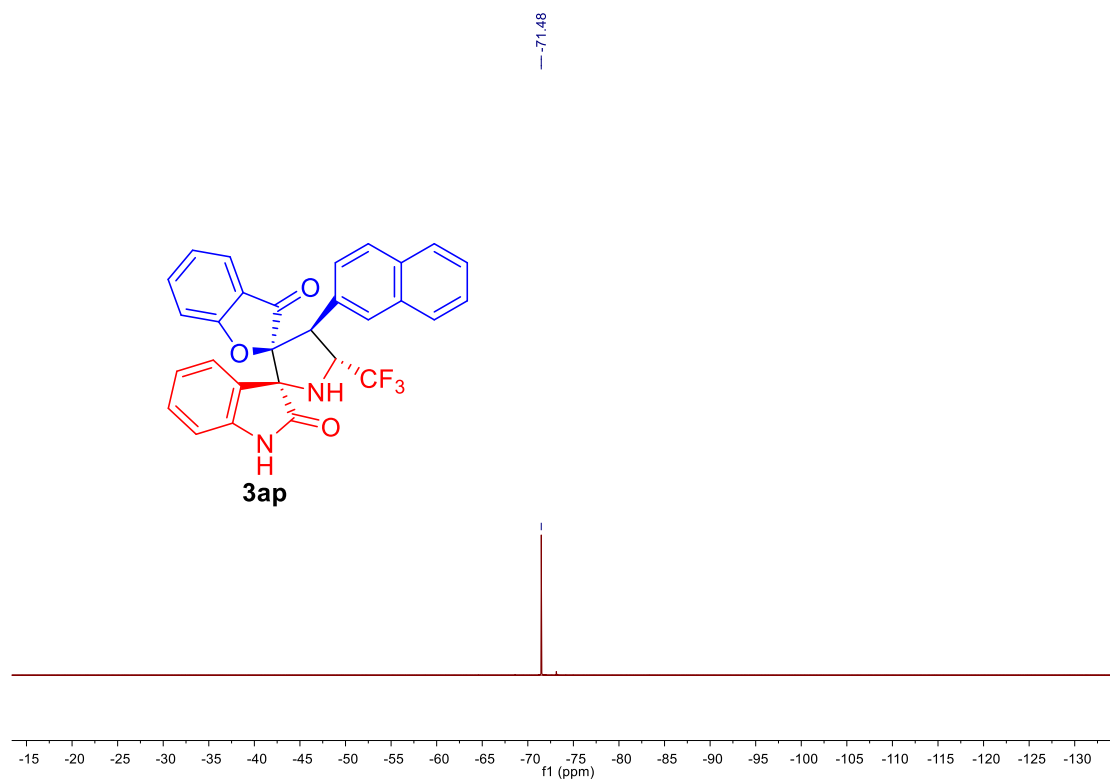

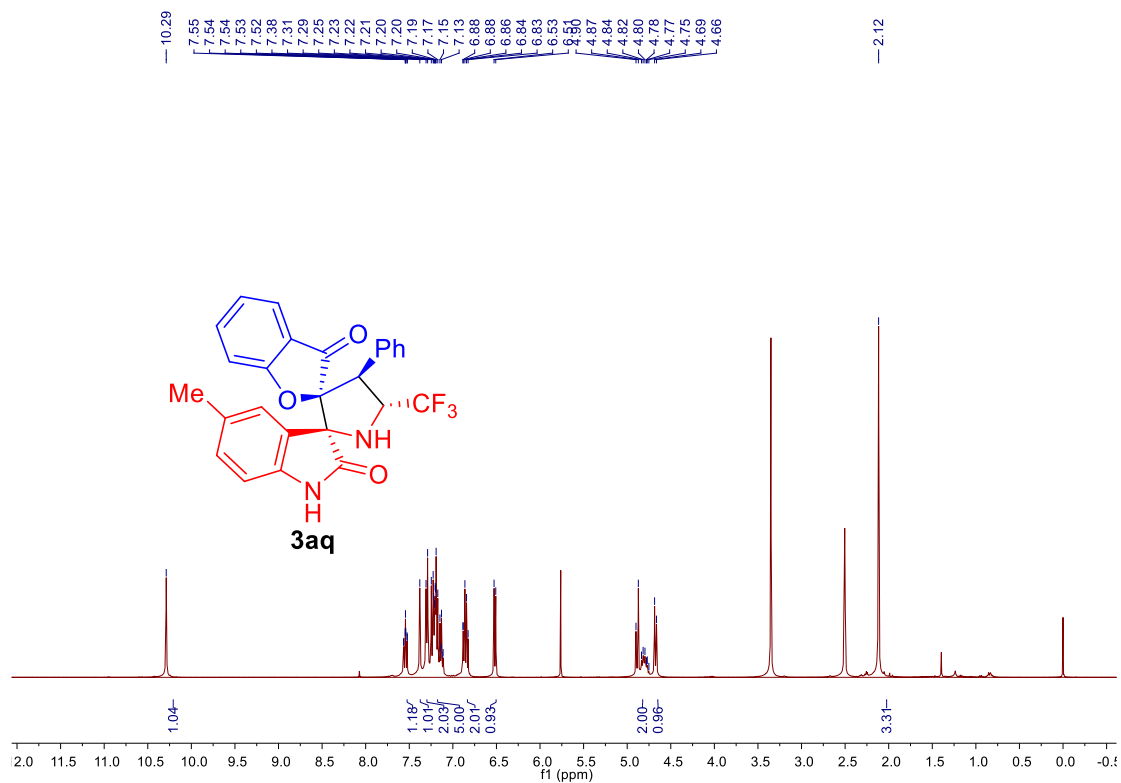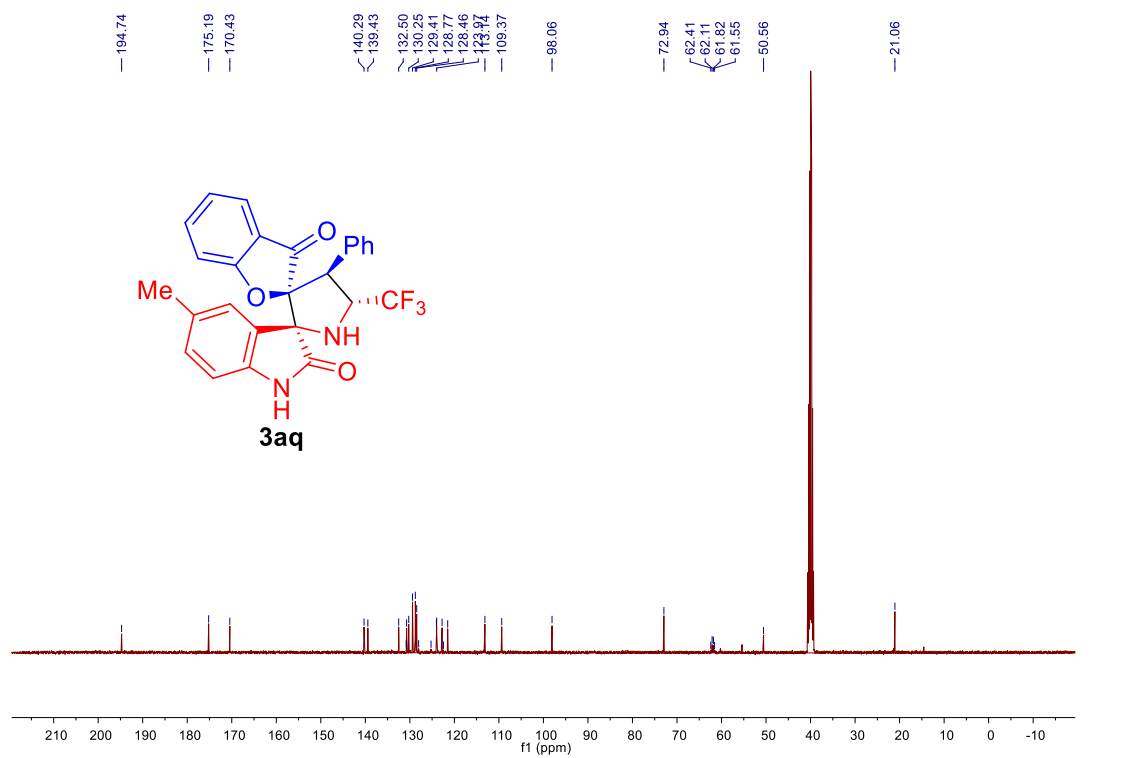

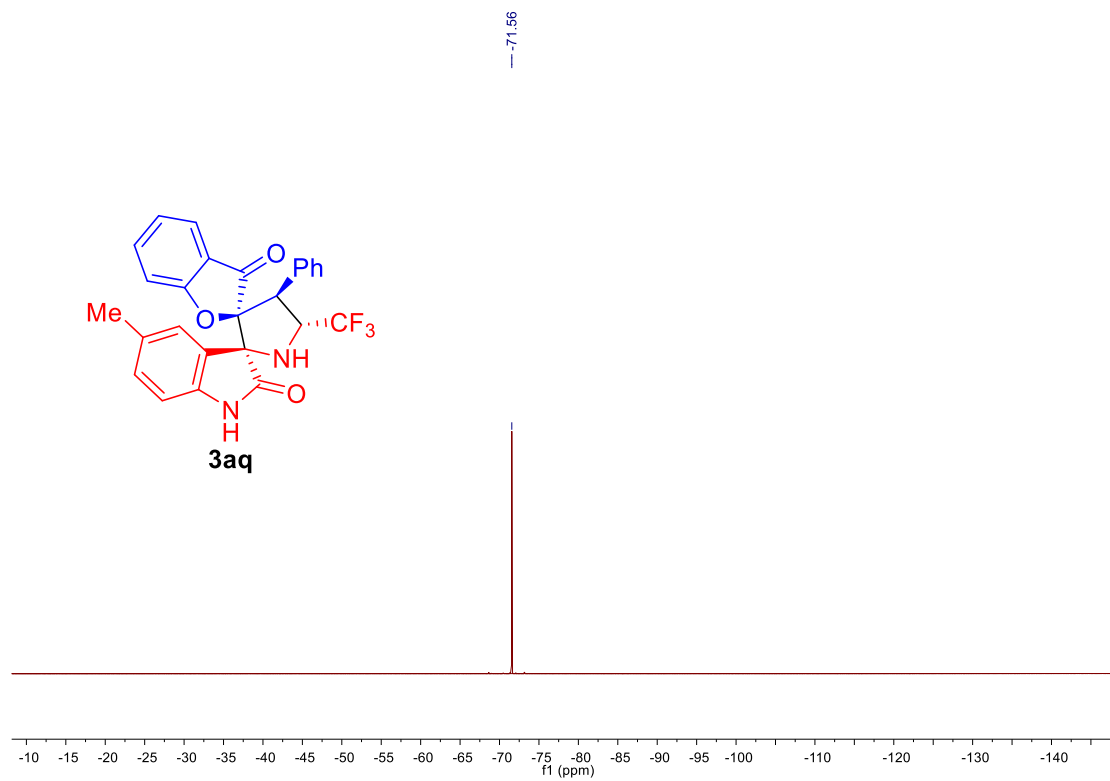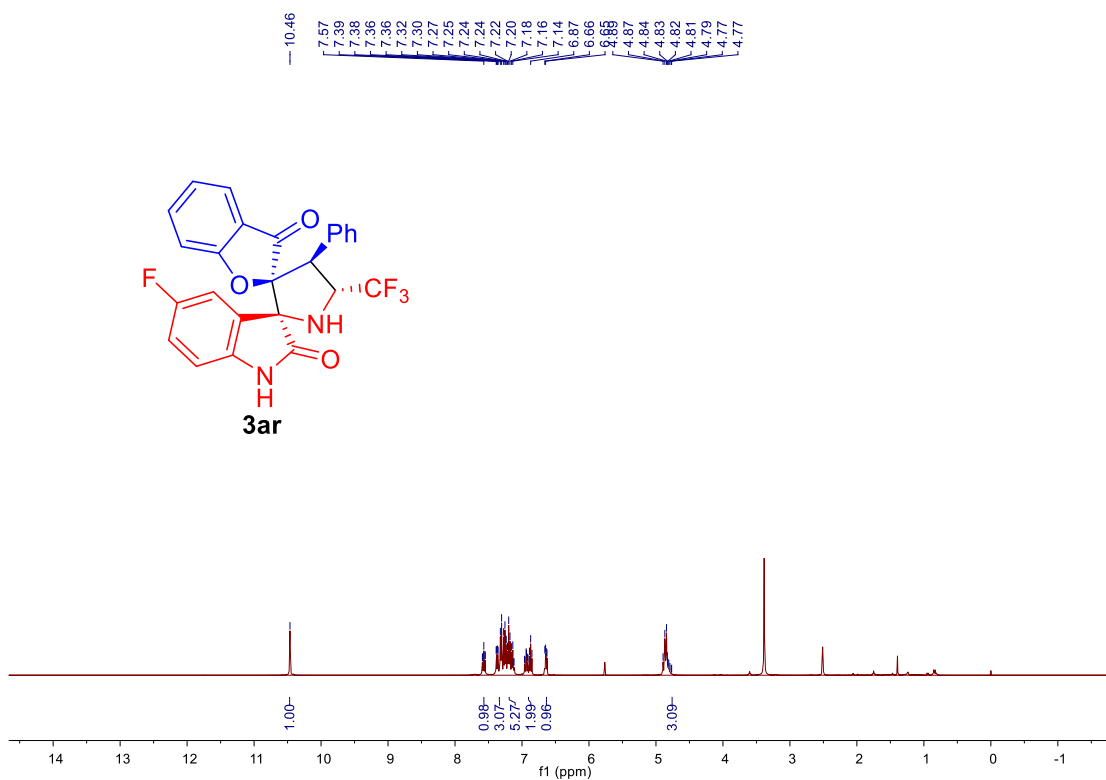

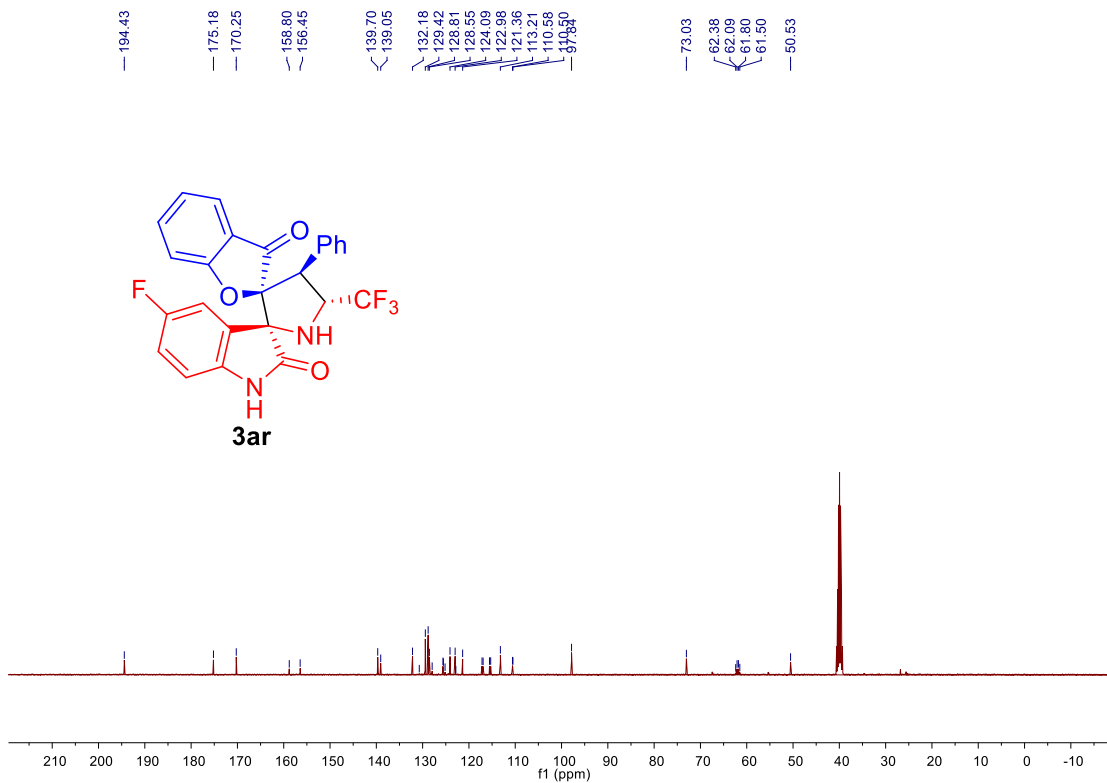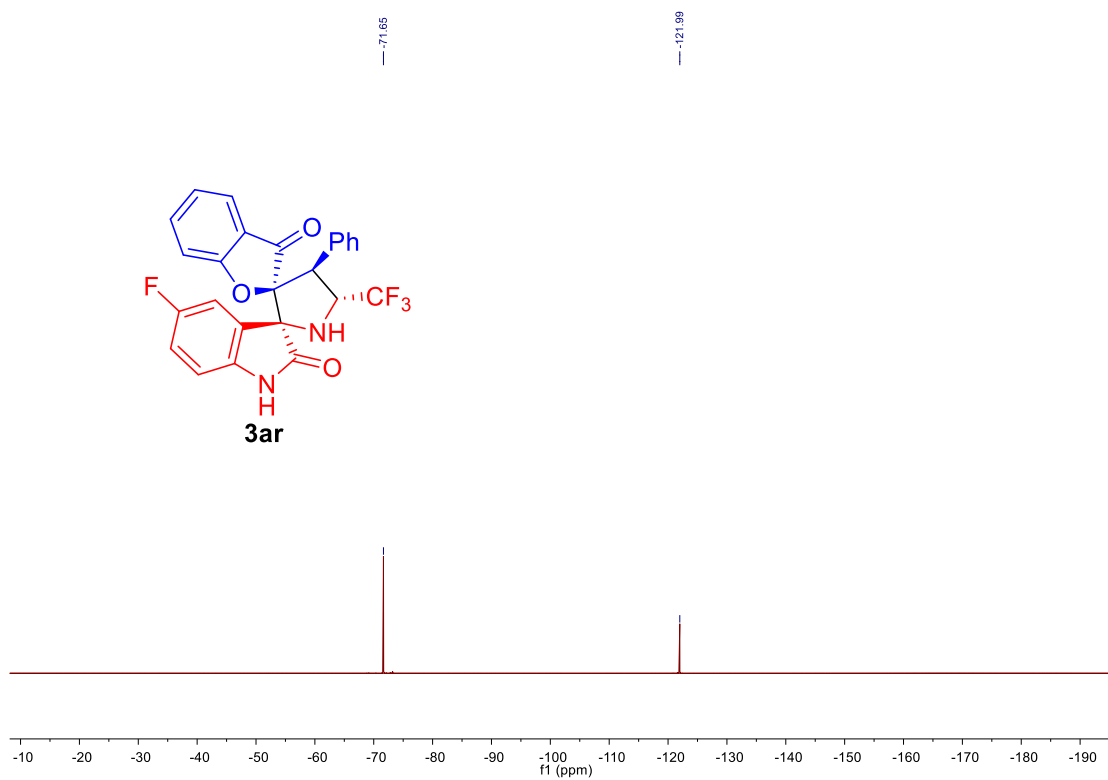

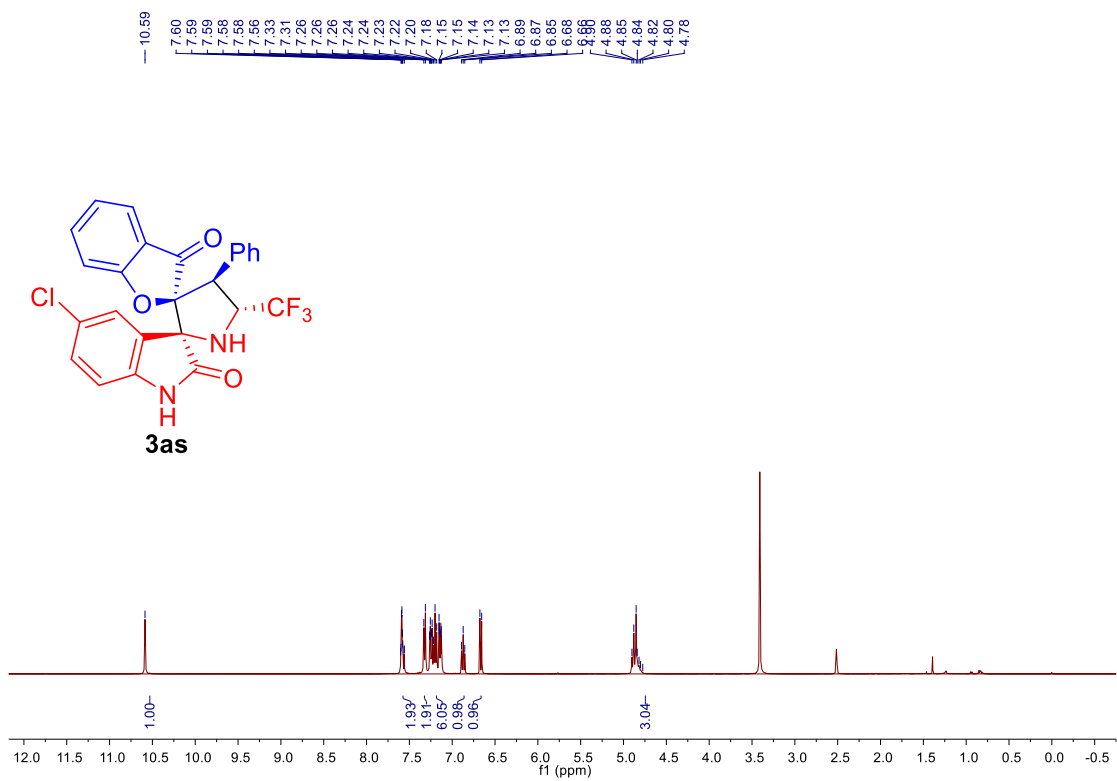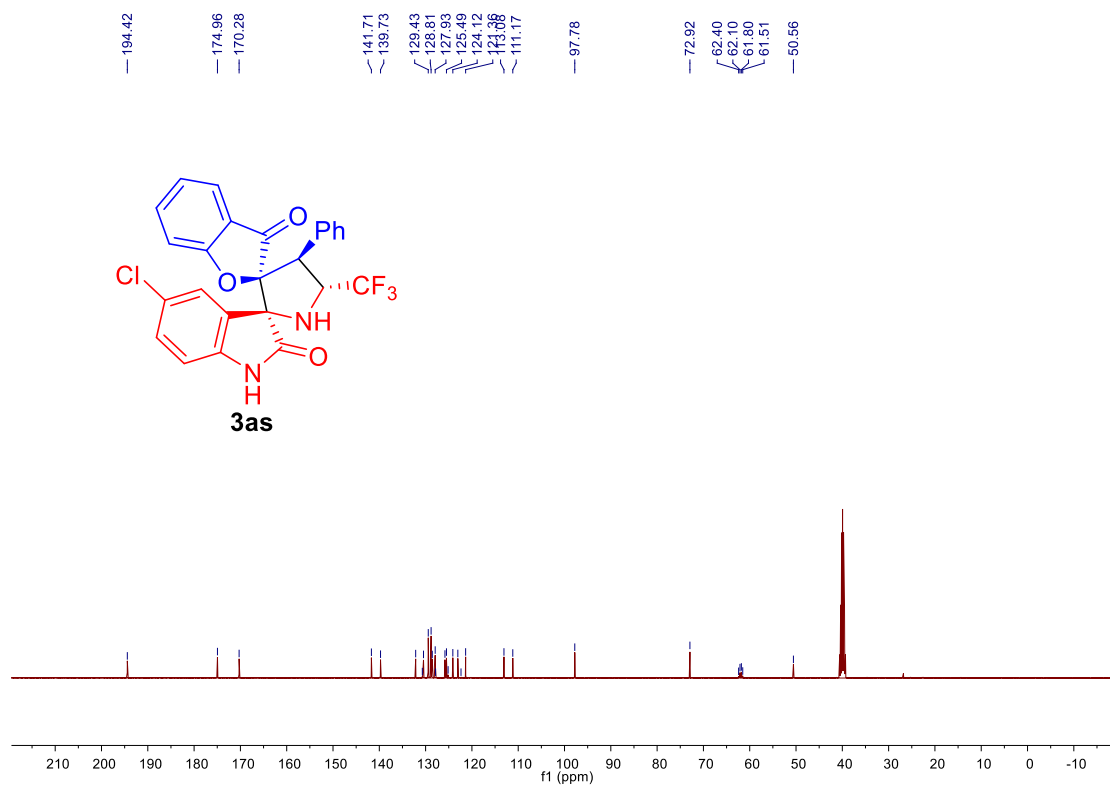

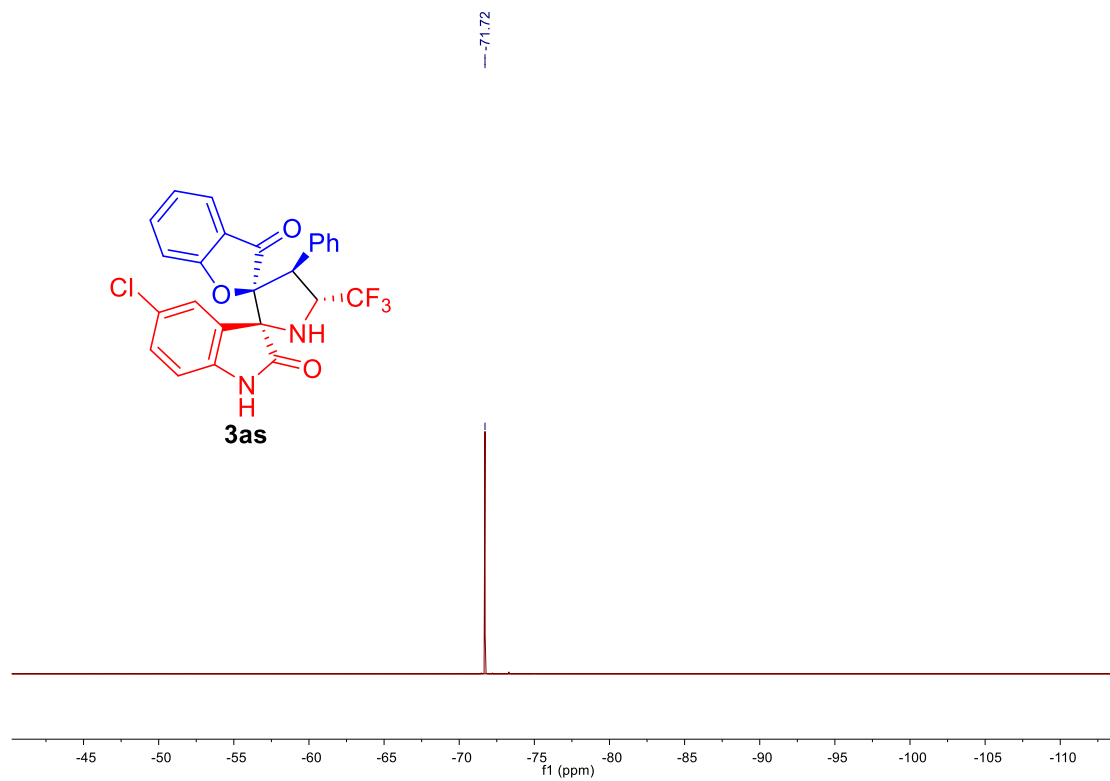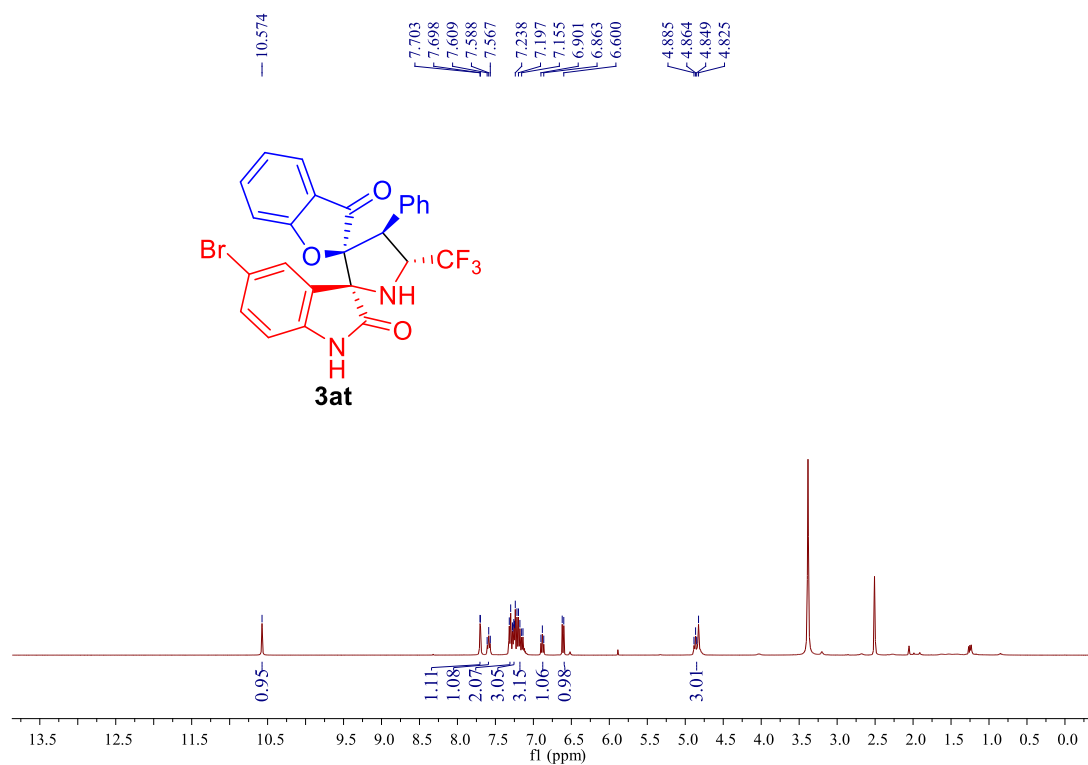

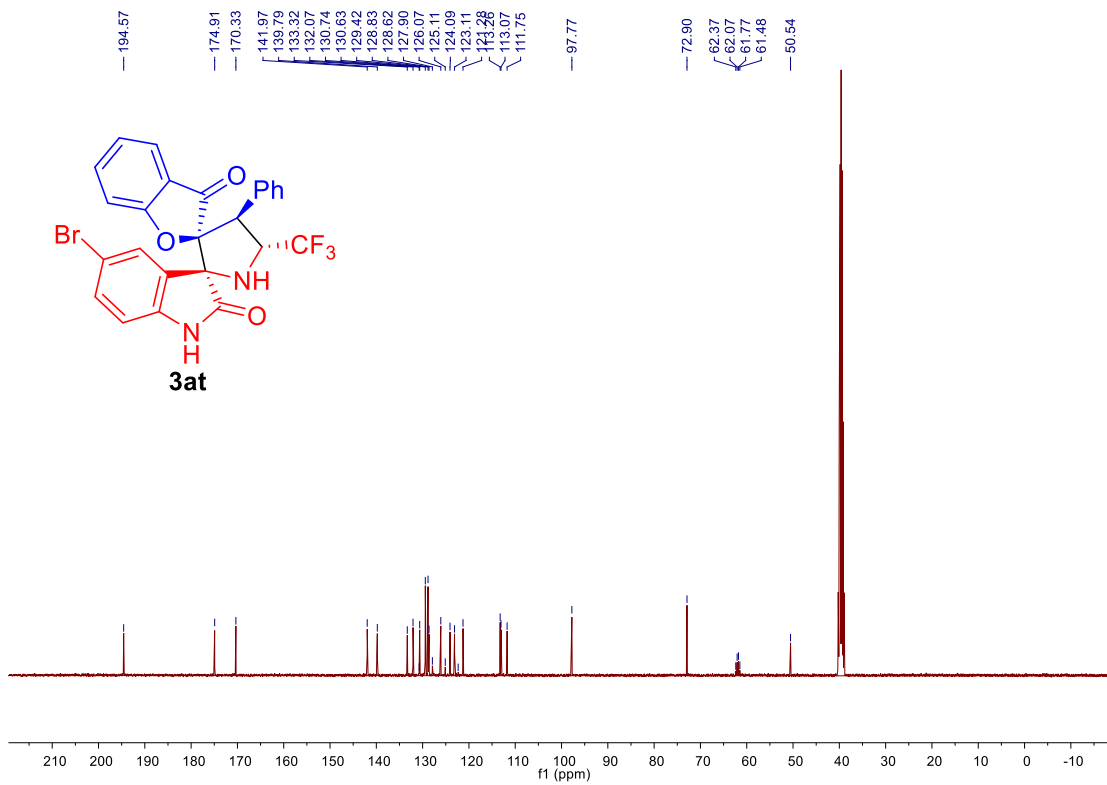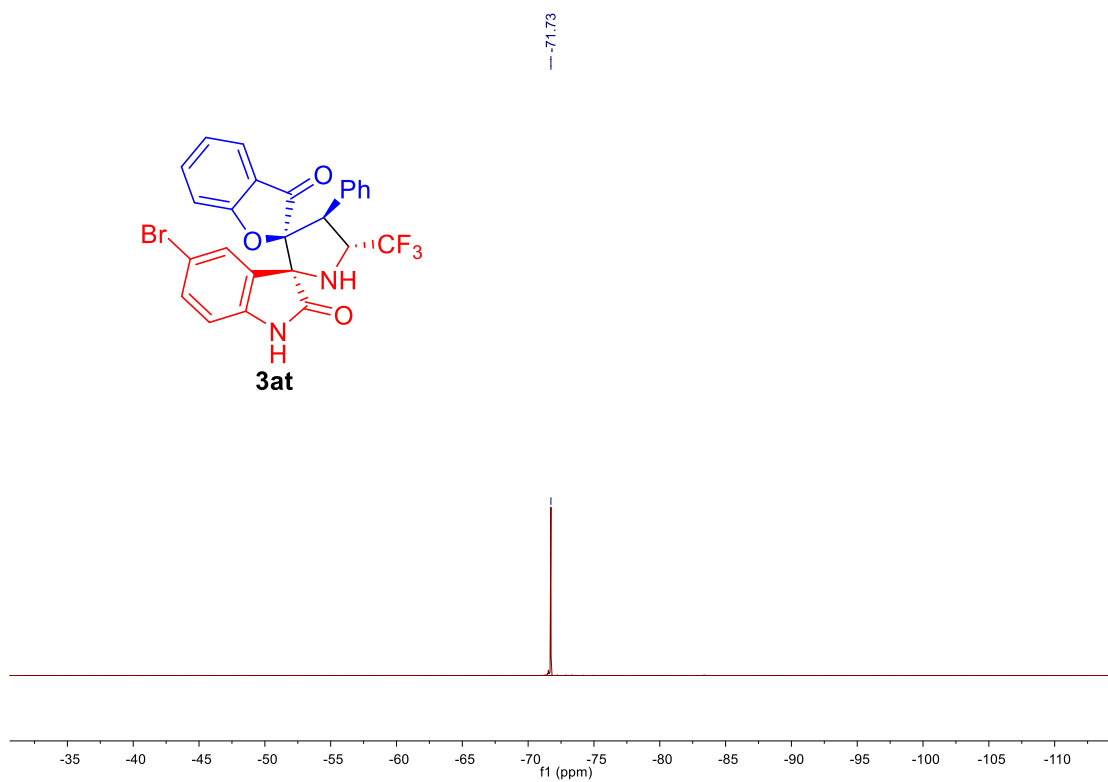



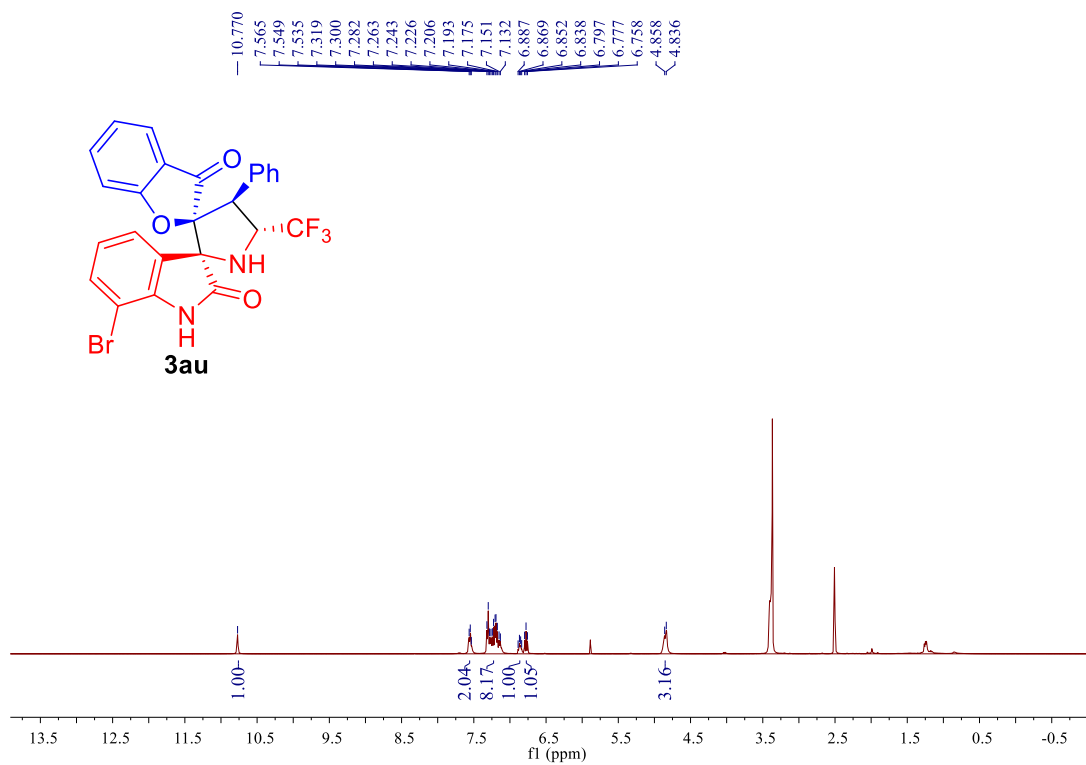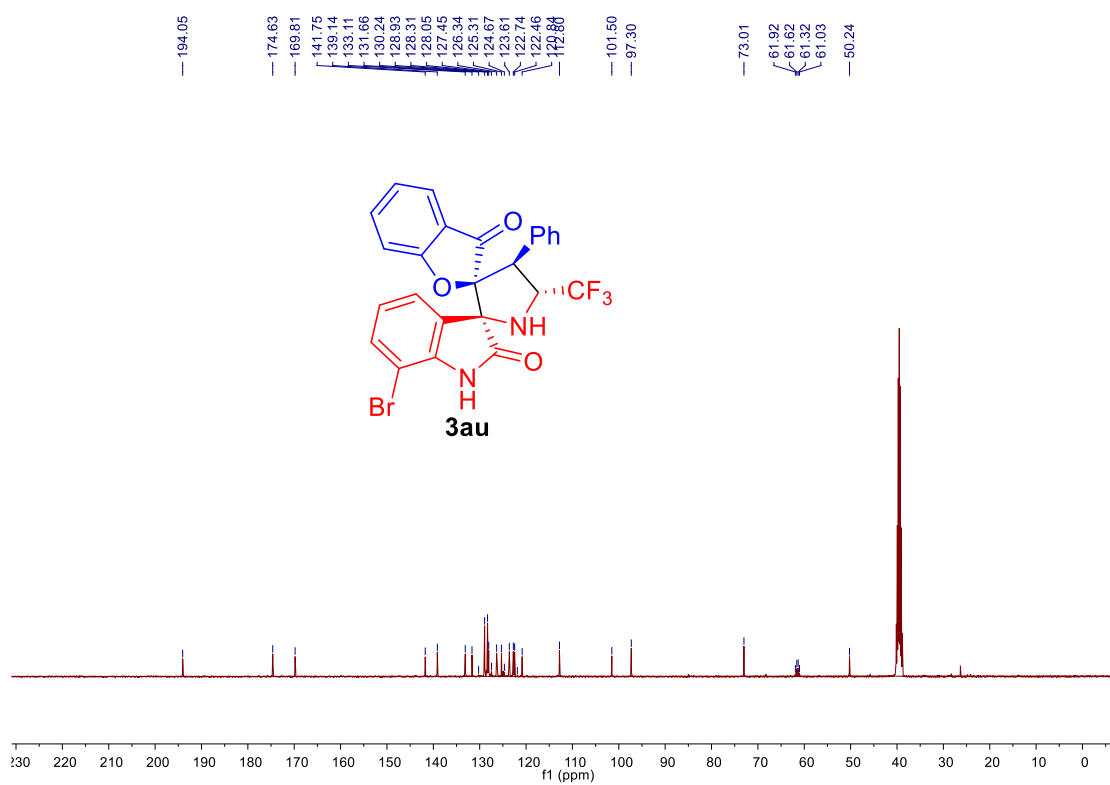

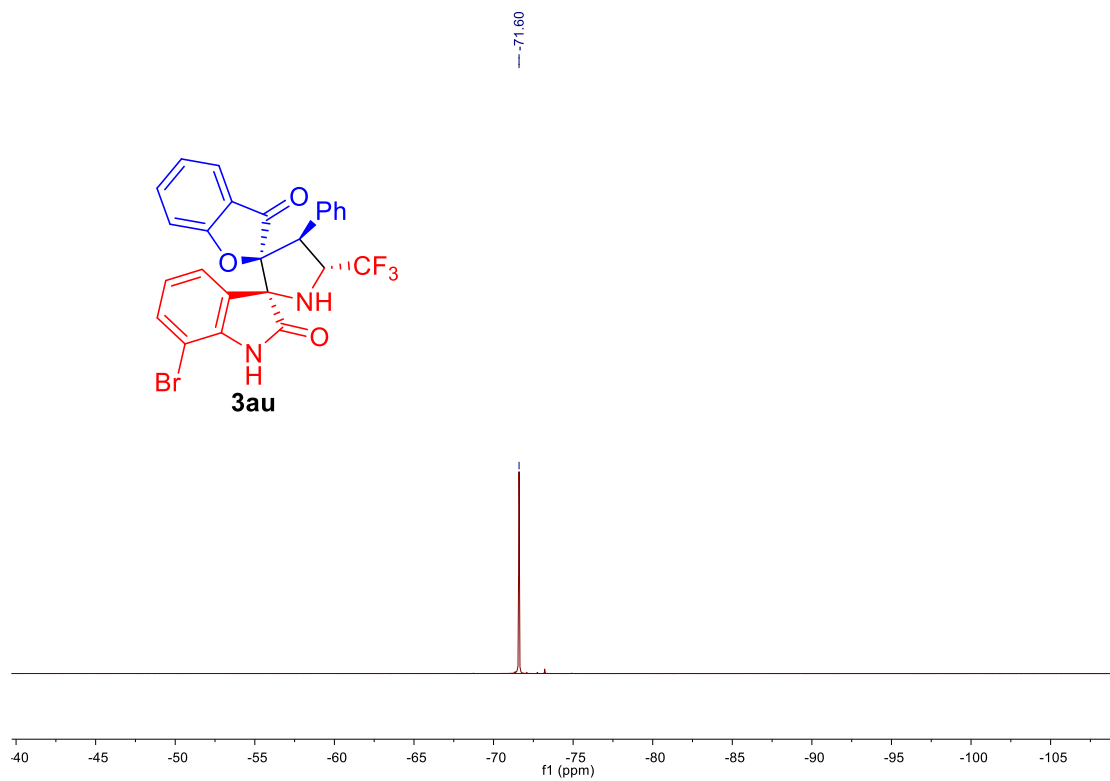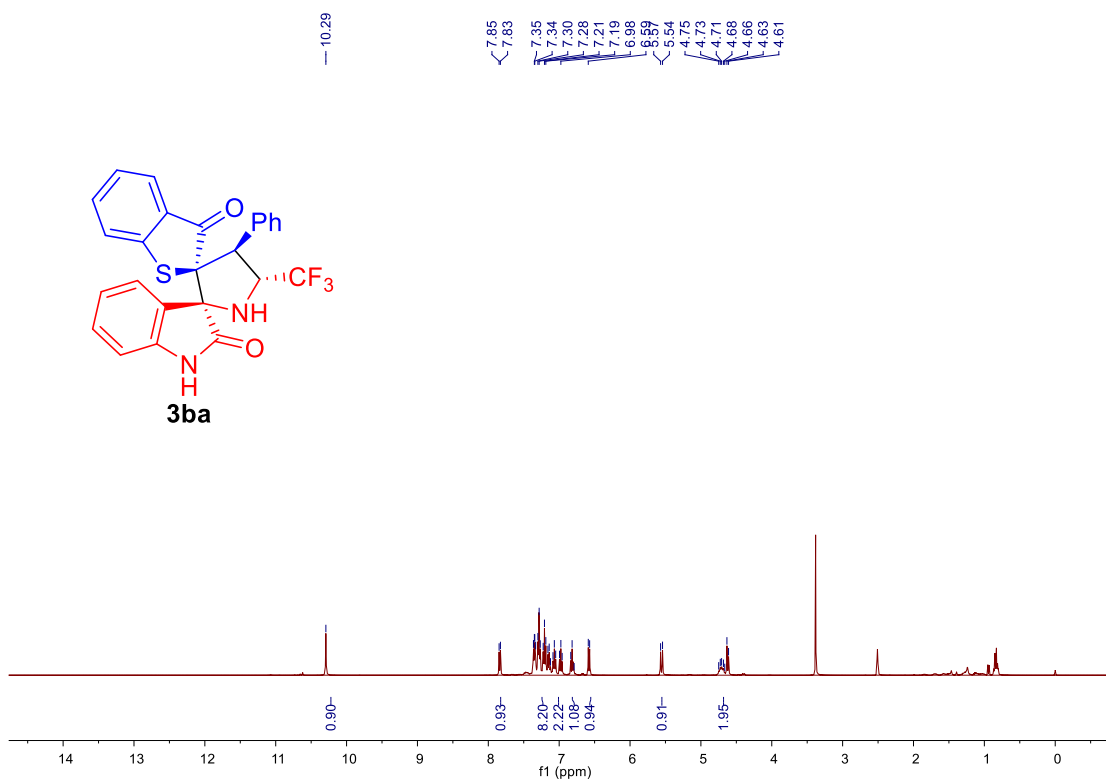

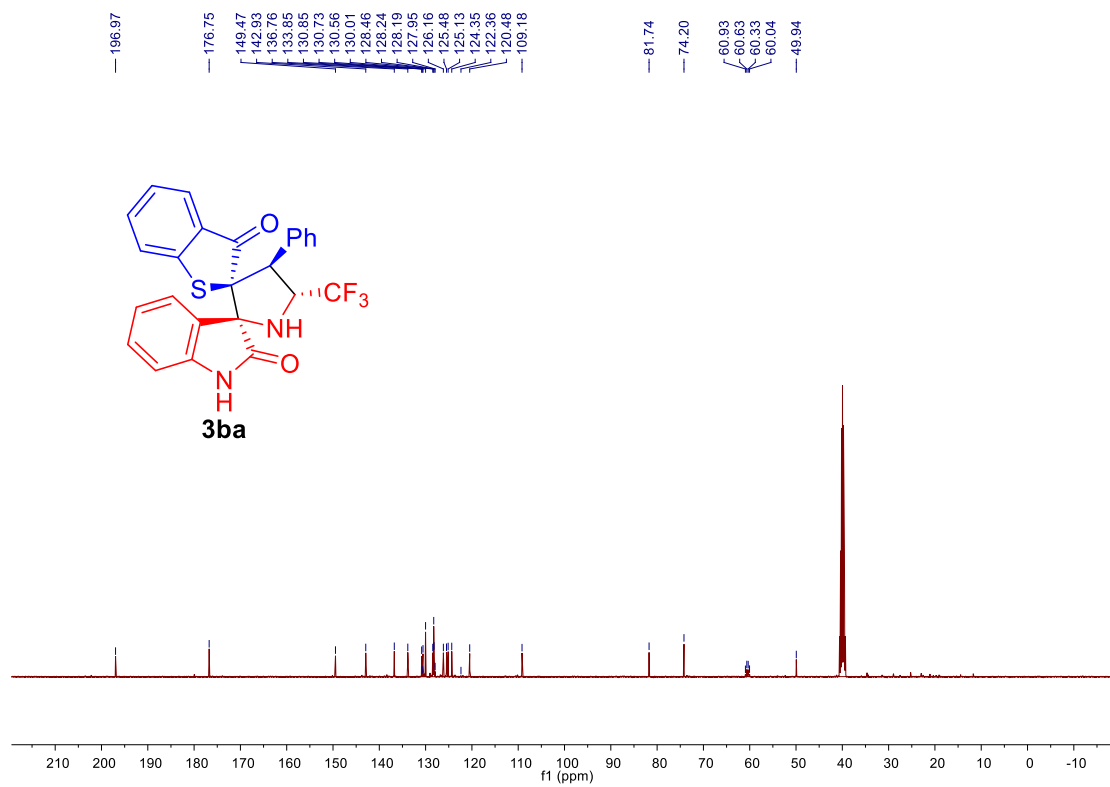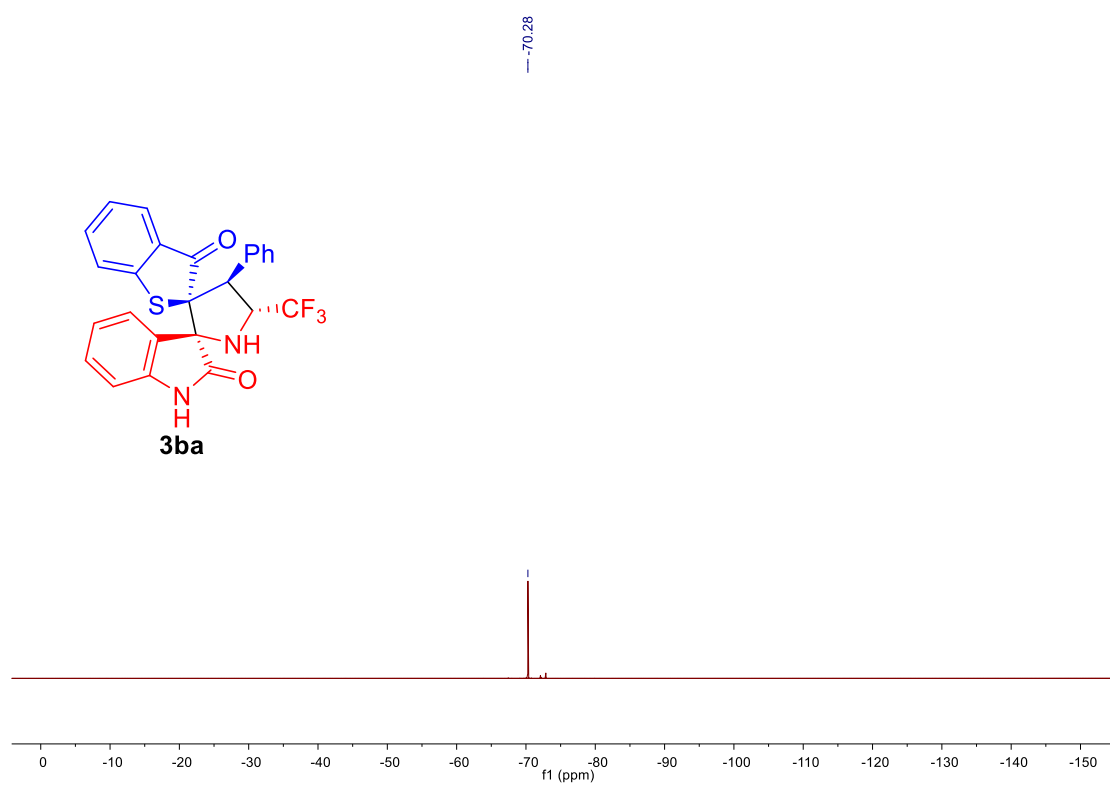

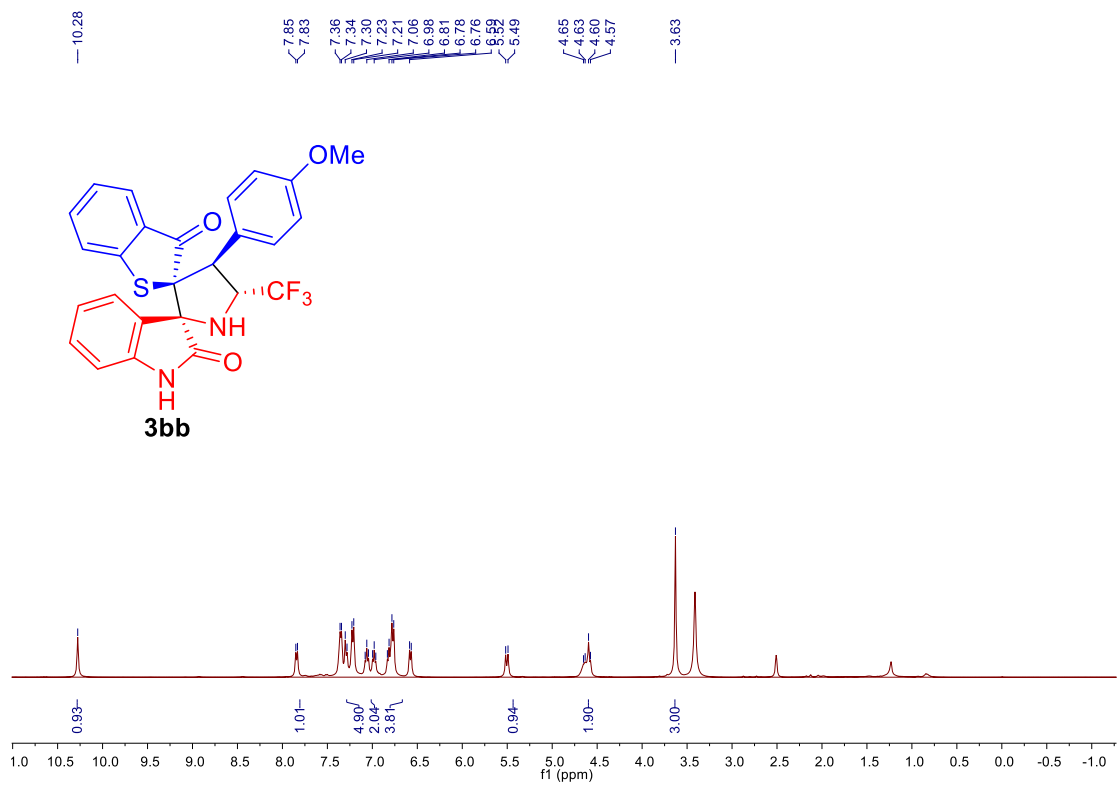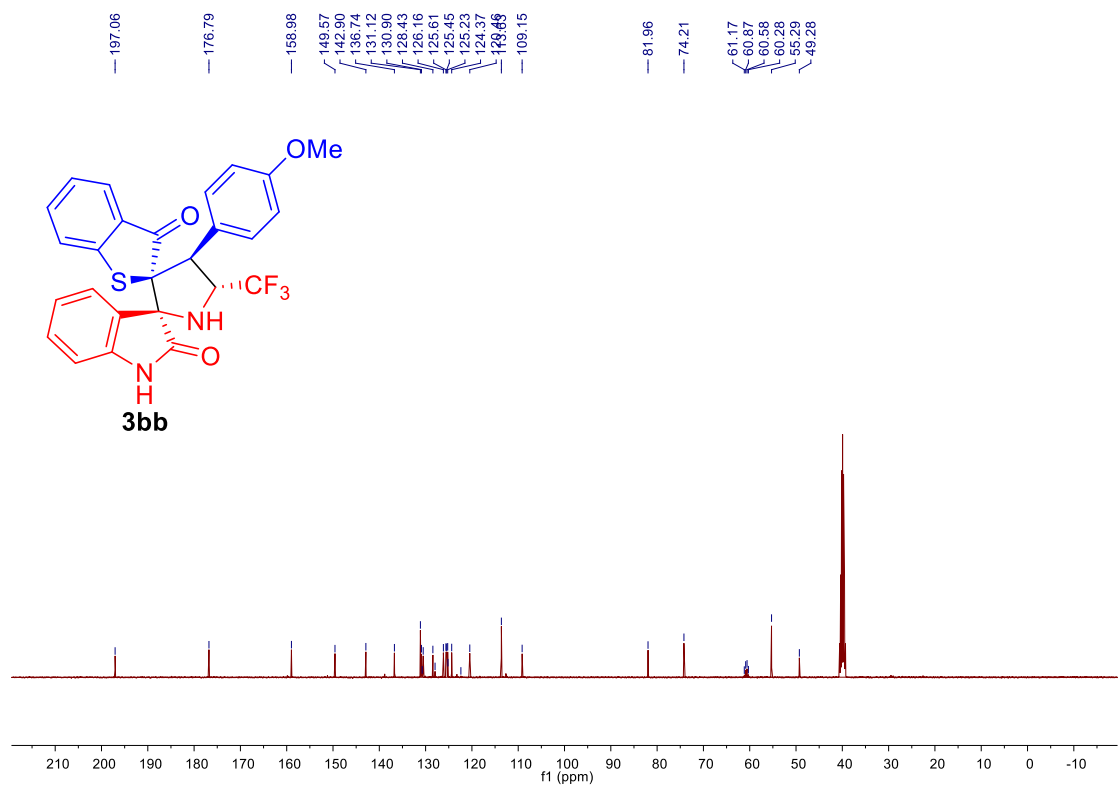

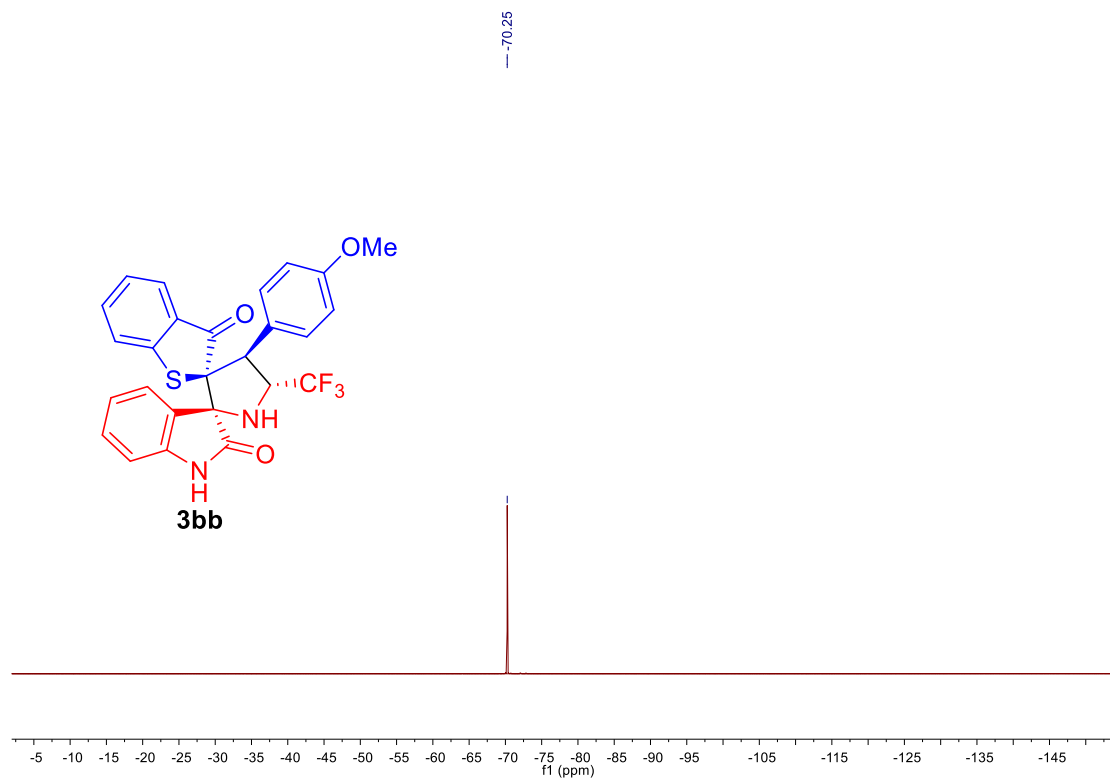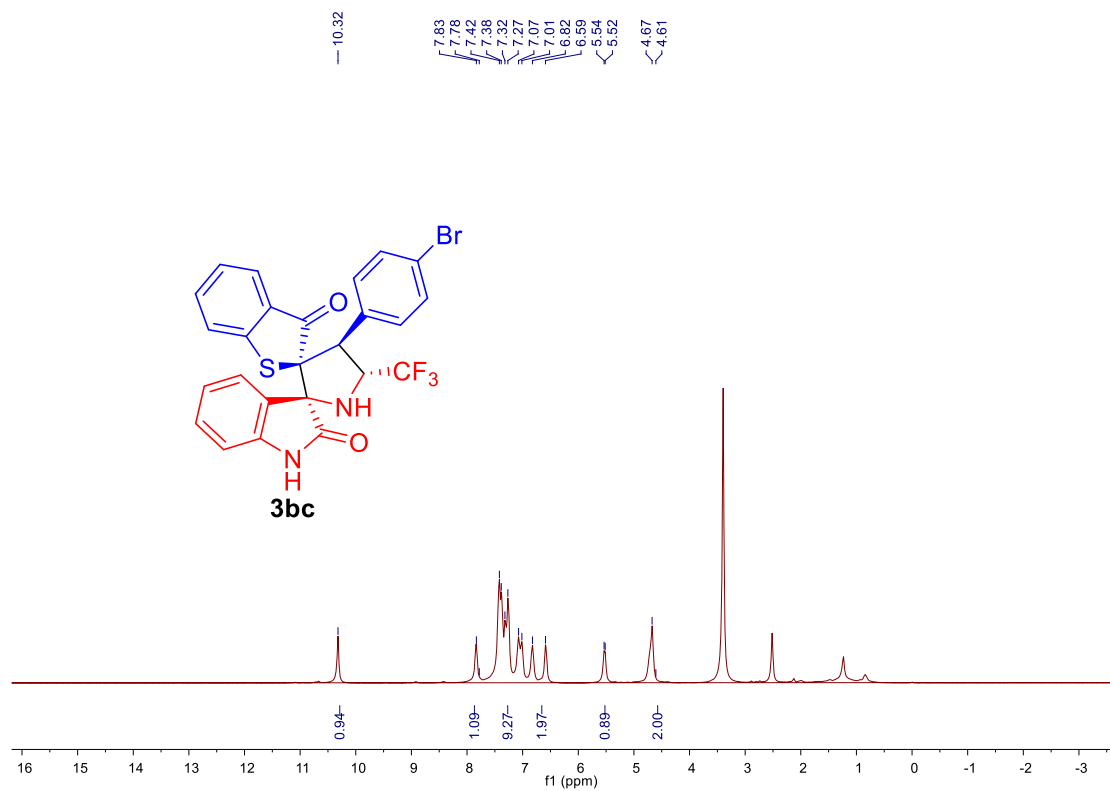

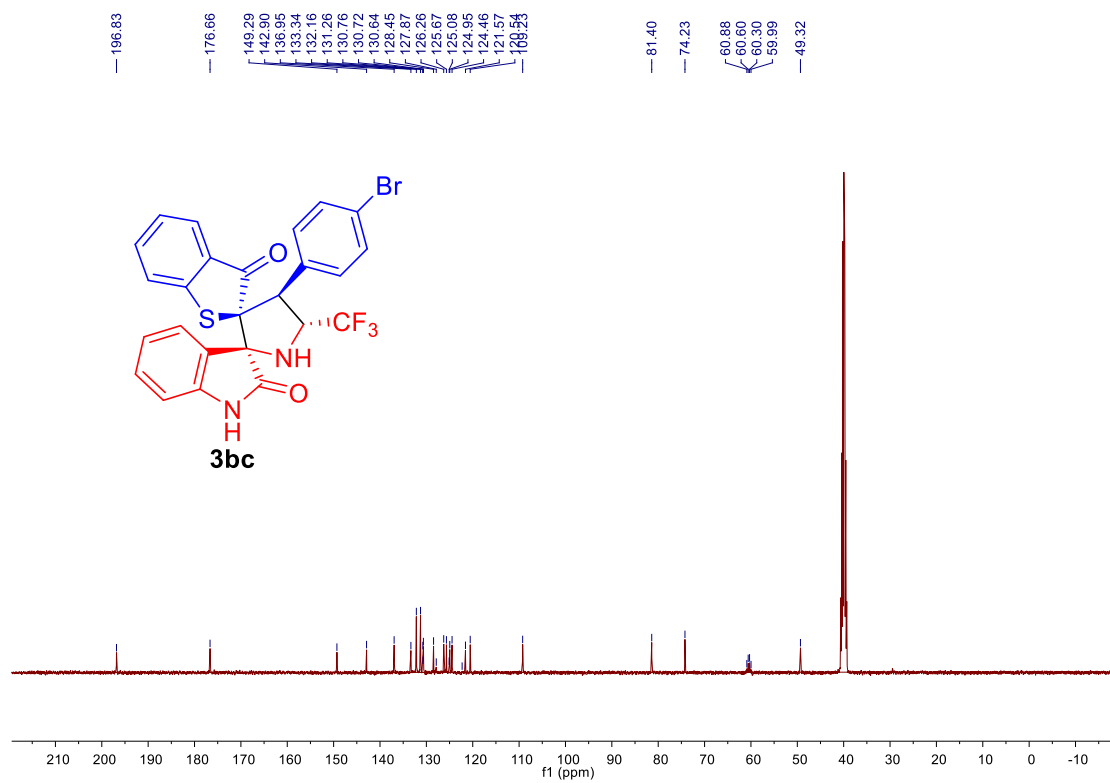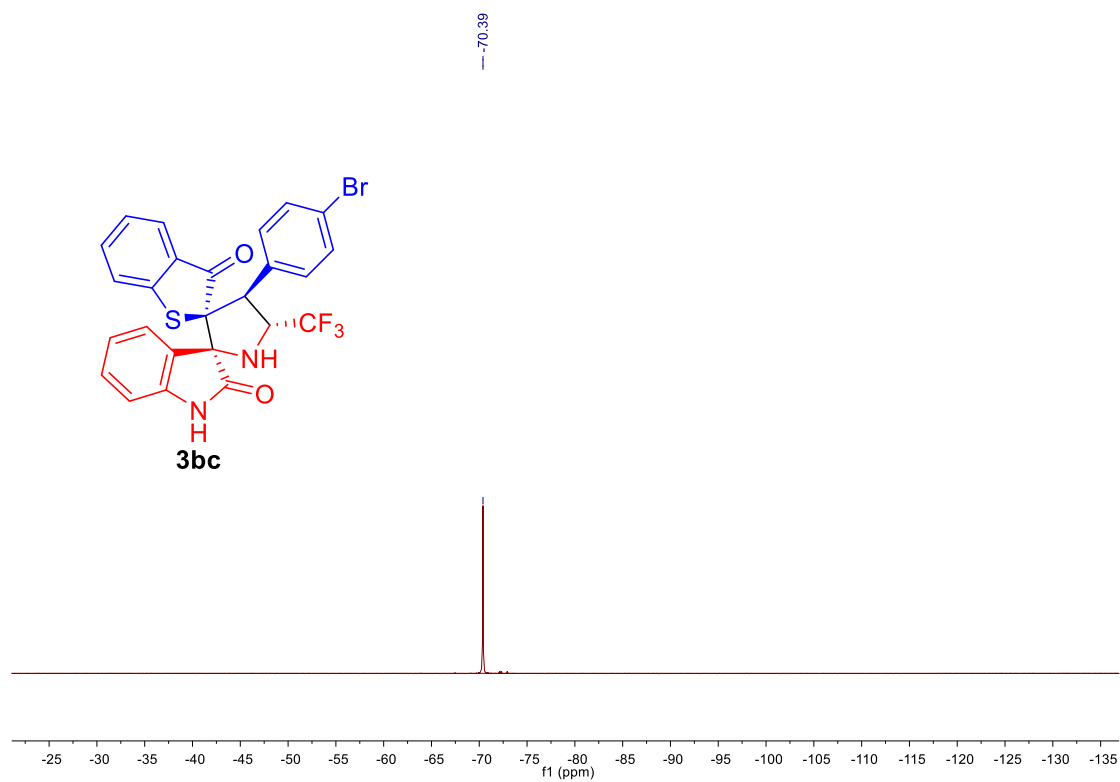

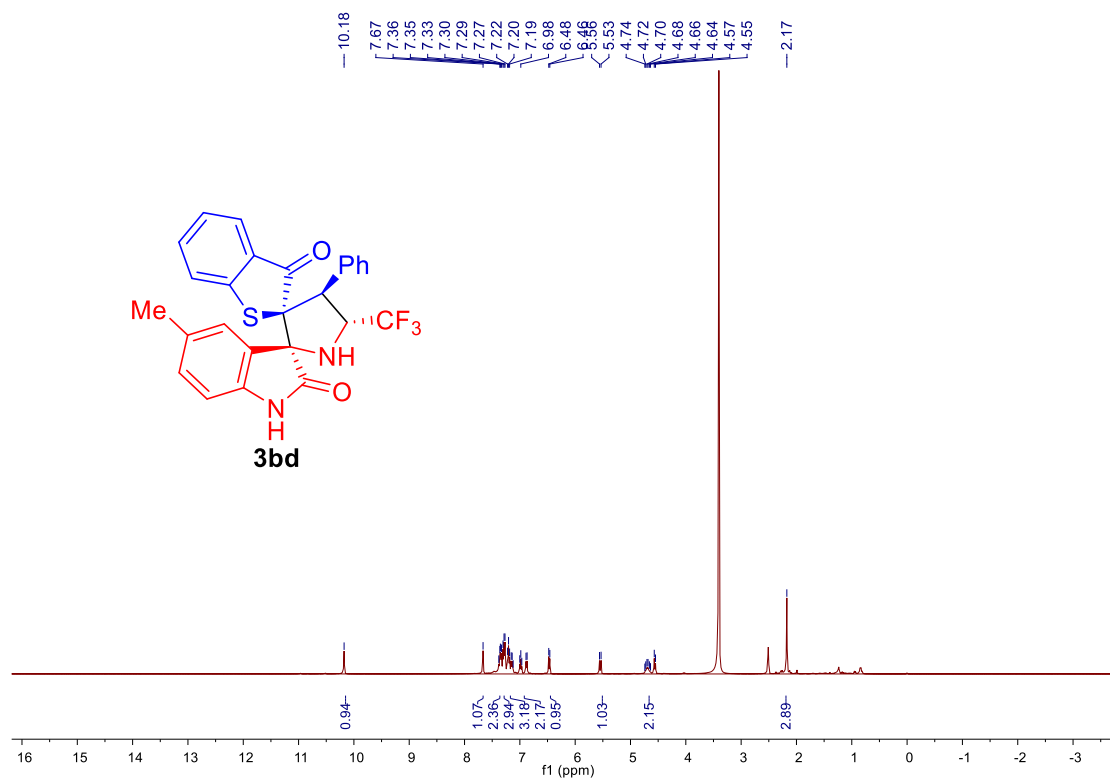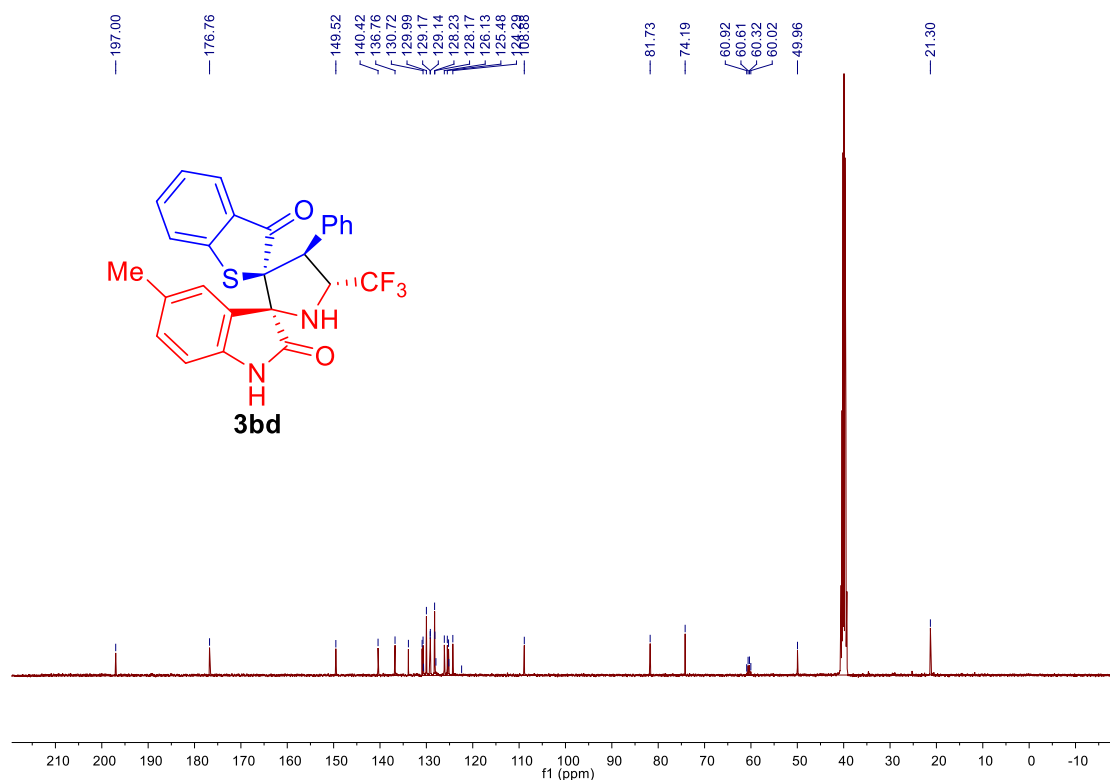

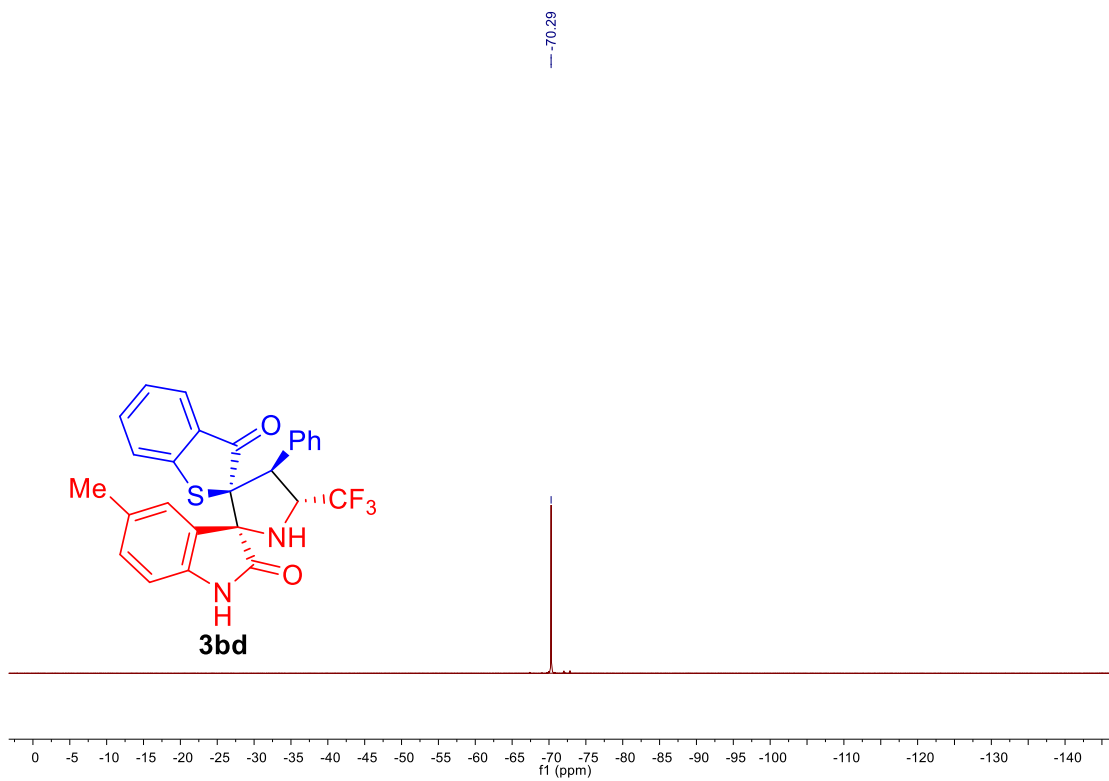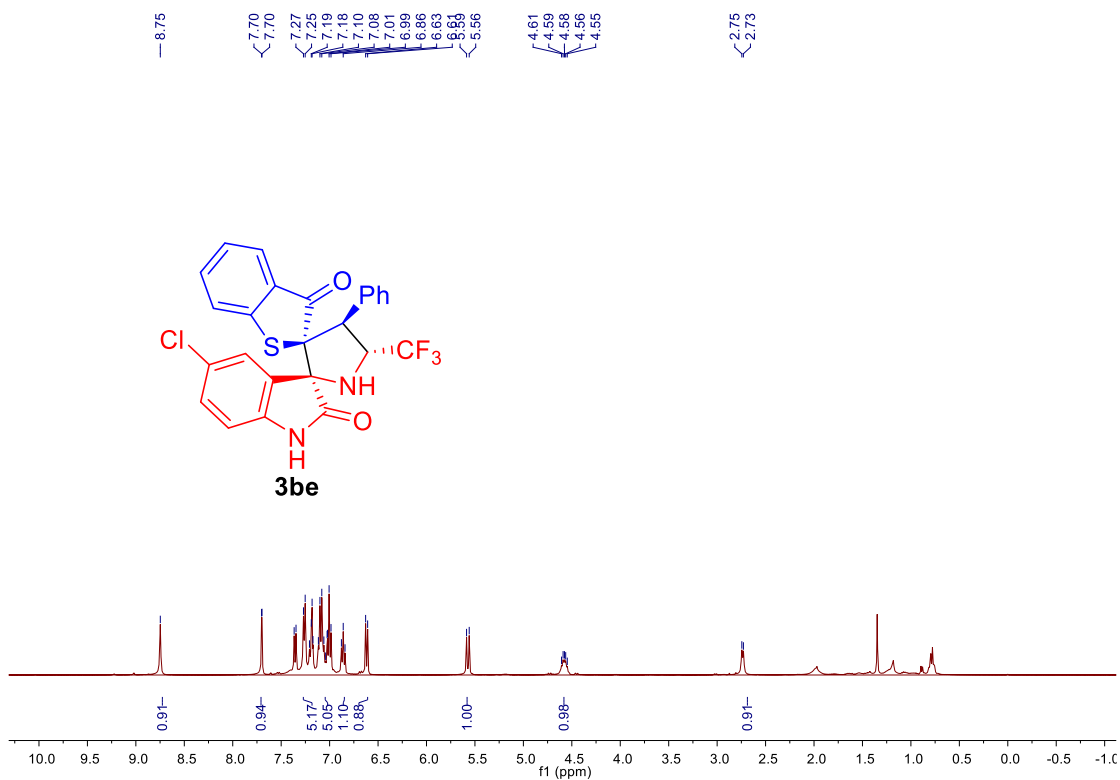



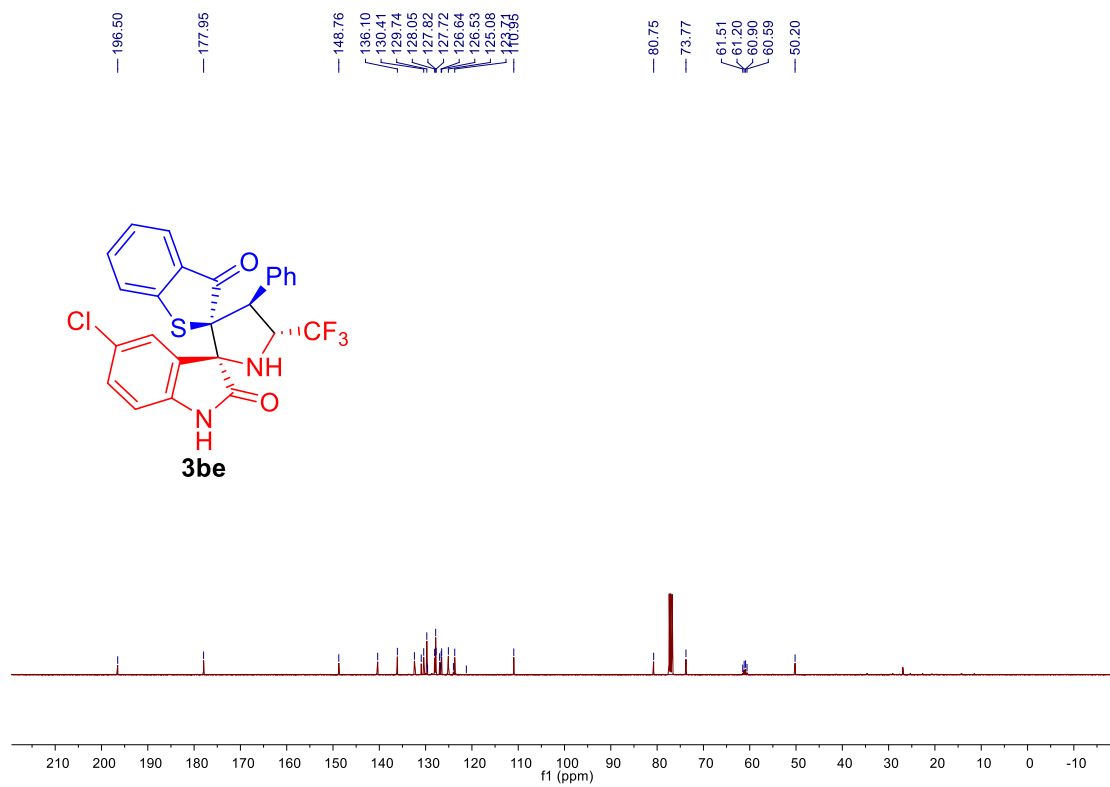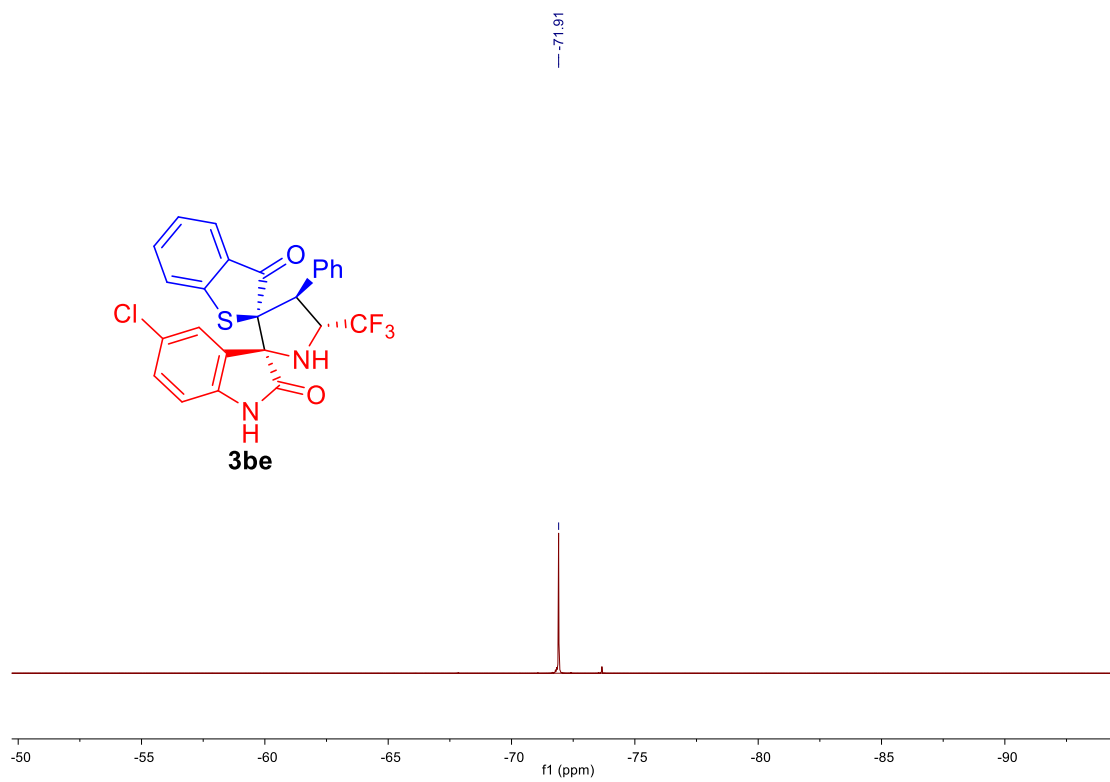

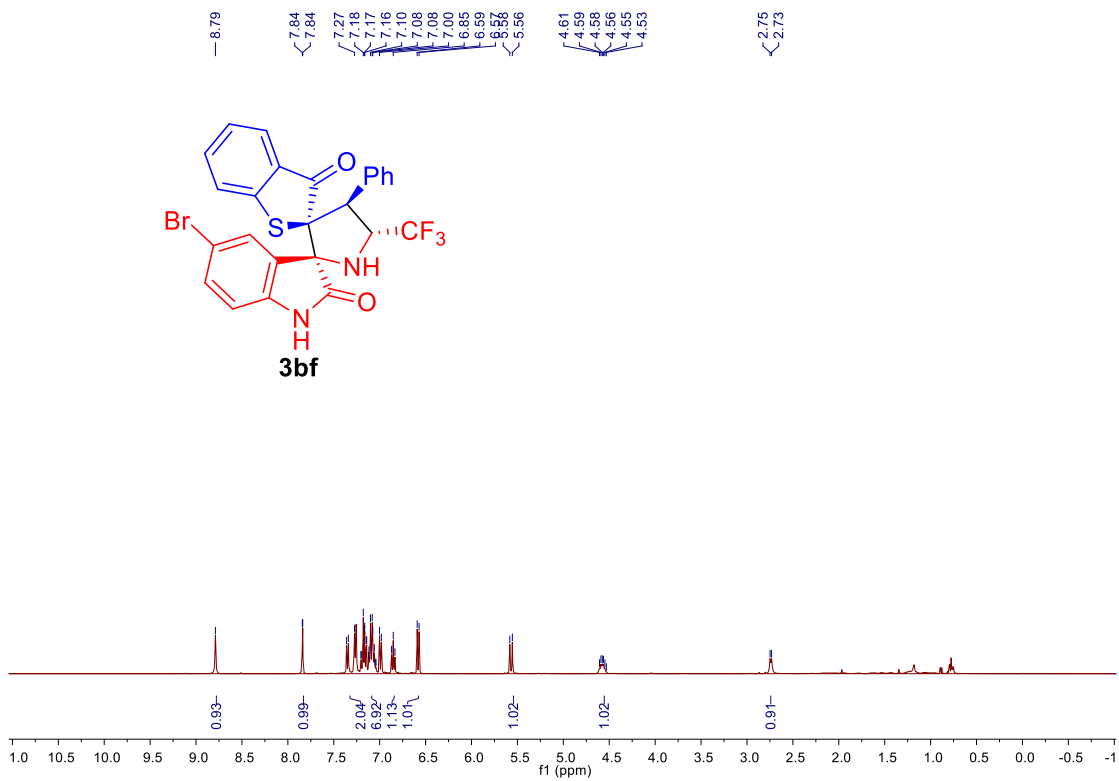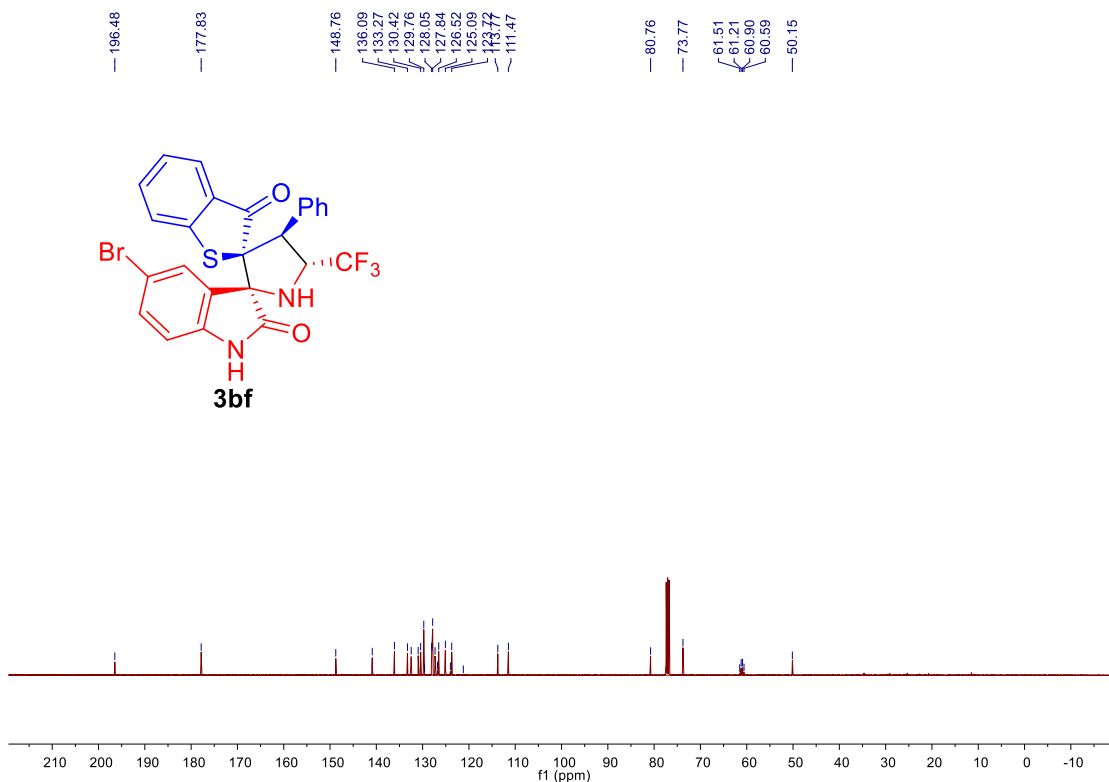

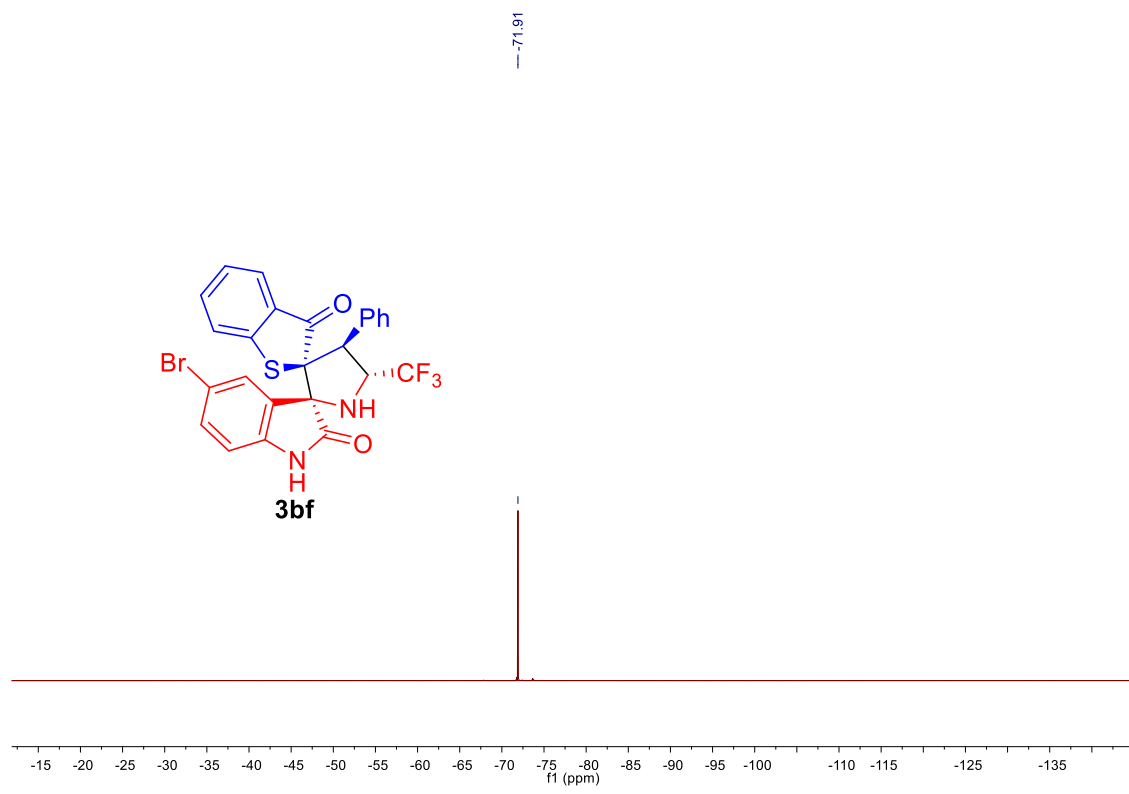

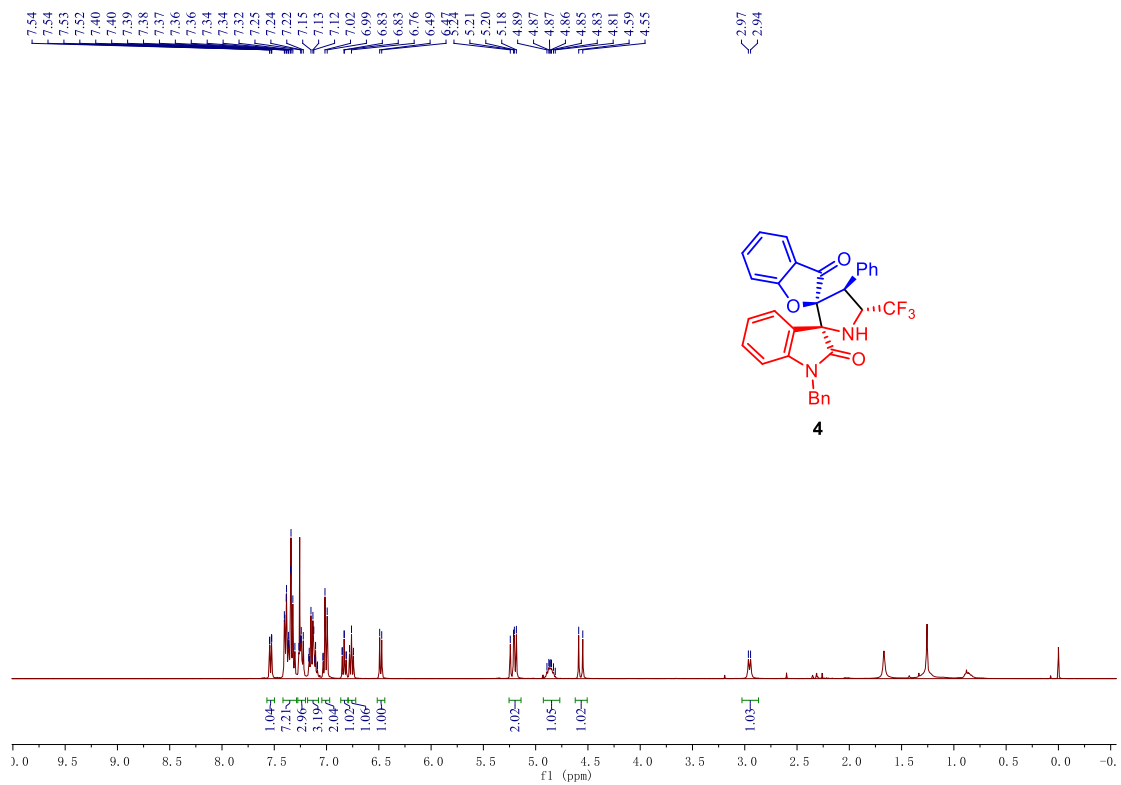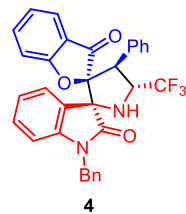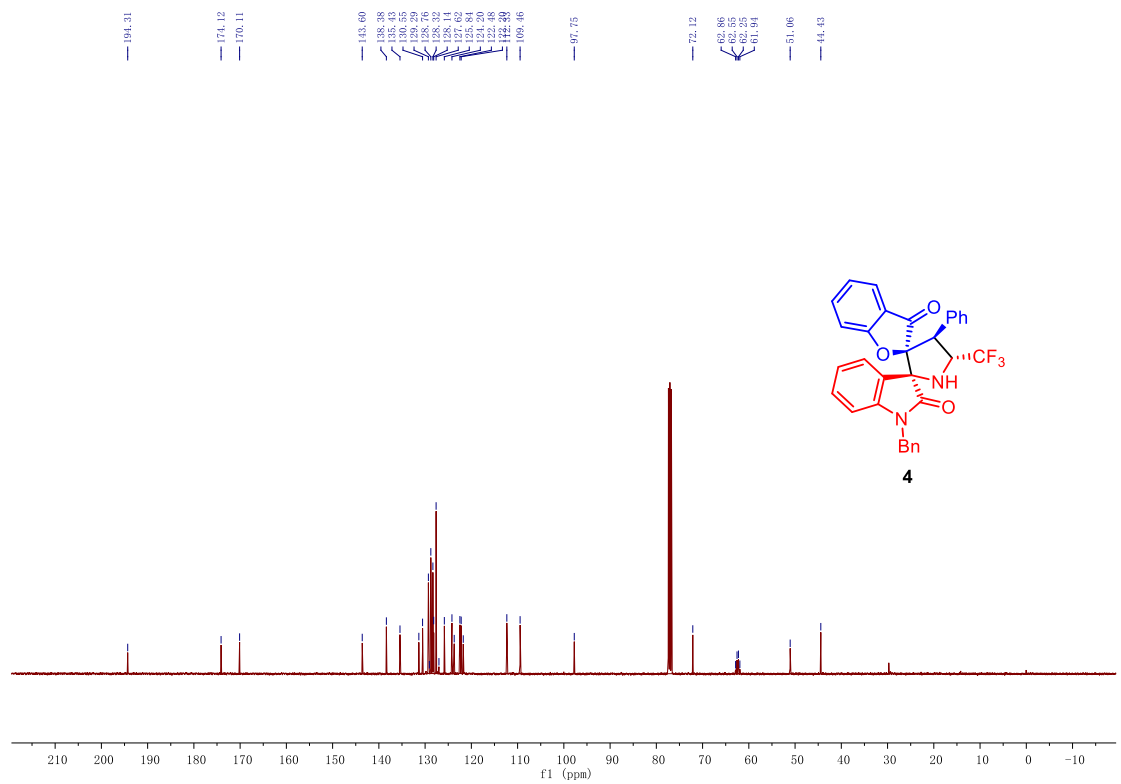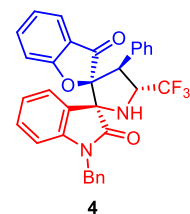

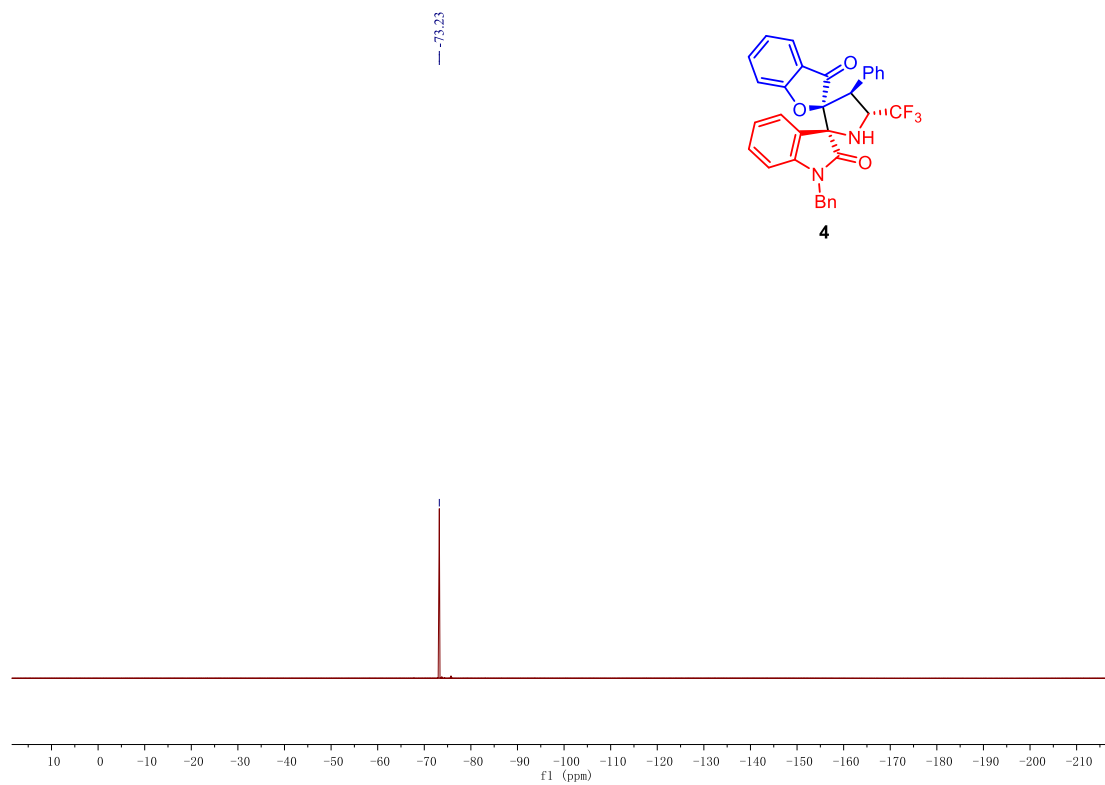

## HPLC spectra of compounds

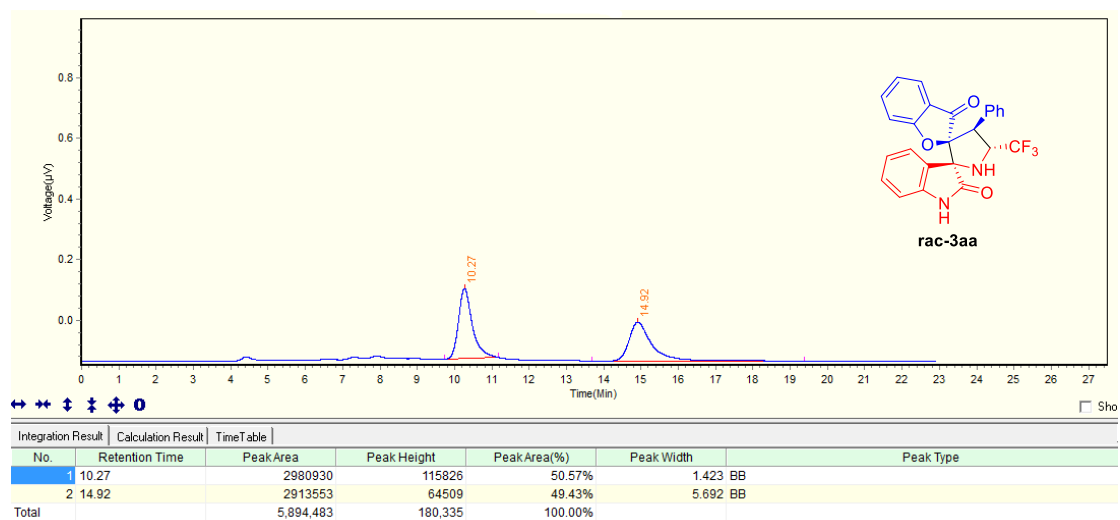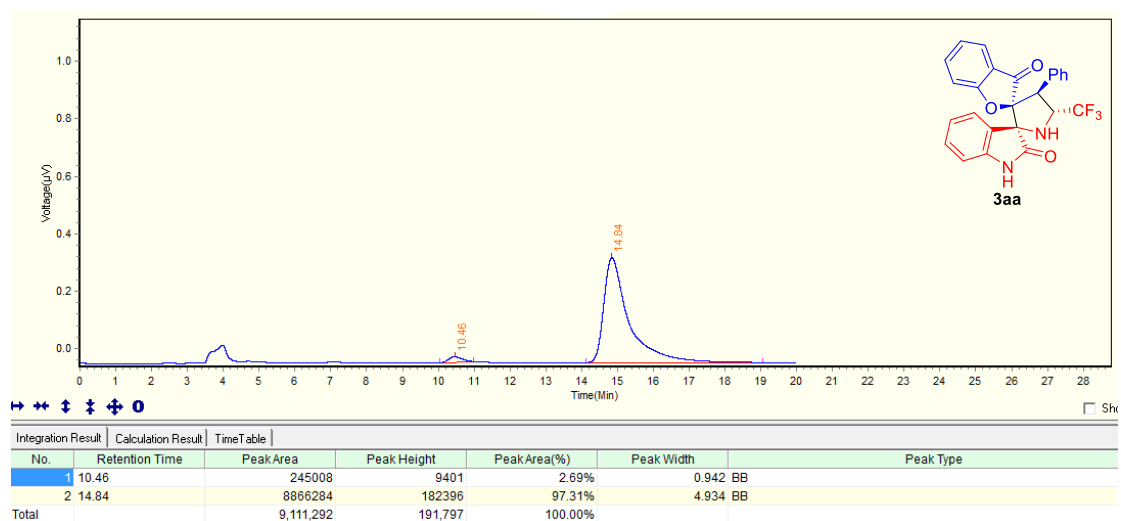

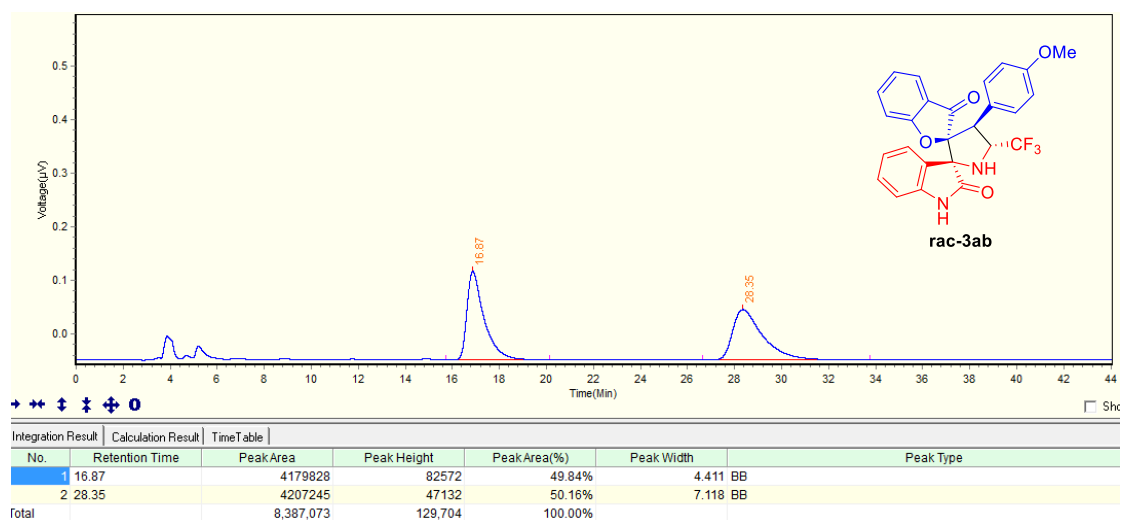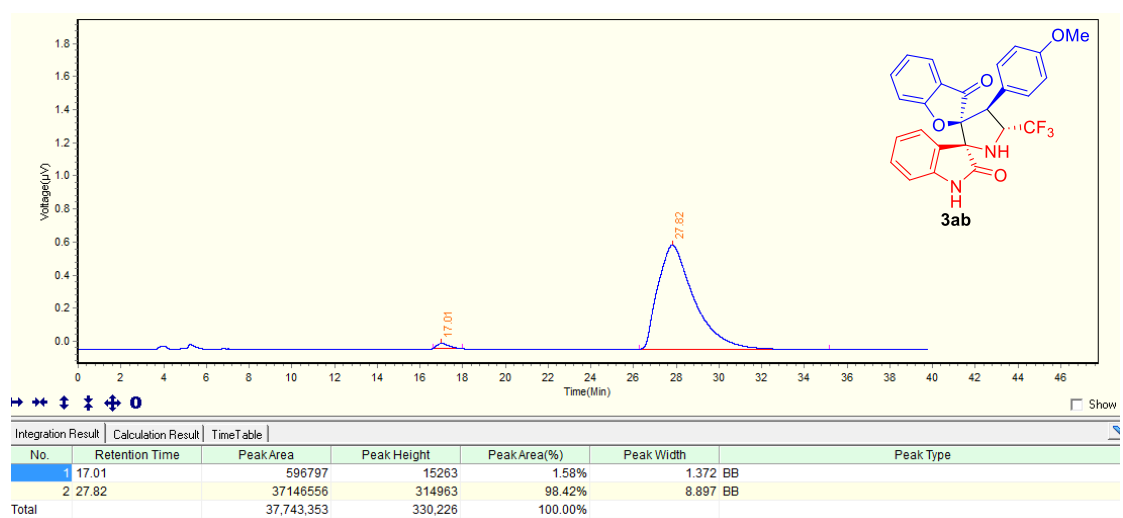

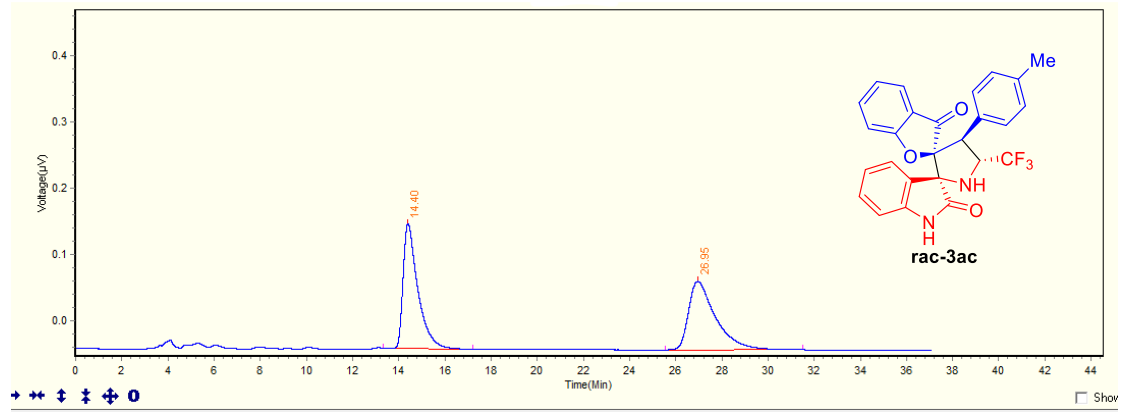

| Integration Result |                | Calculation Result |             | TimeTable    |            |           |
|--------------------|----------------|--------------------|-------------|--------------|------------|-----------|
| No.                | Retention Time | Peak Area          | Peak Height | Peak Area(%) | Peak Width | Peak Type |
| 1                  | 14.40          | 4154323            | 94161       | 49.81%       | 3.883      | BB        |
| 2                  | 26.95          | 4185221            | 51495       | 50.19%       | 5.958      | BB        |
| Total              |                | 8,339,544          | 145,656     | 100.00%      |            |           |

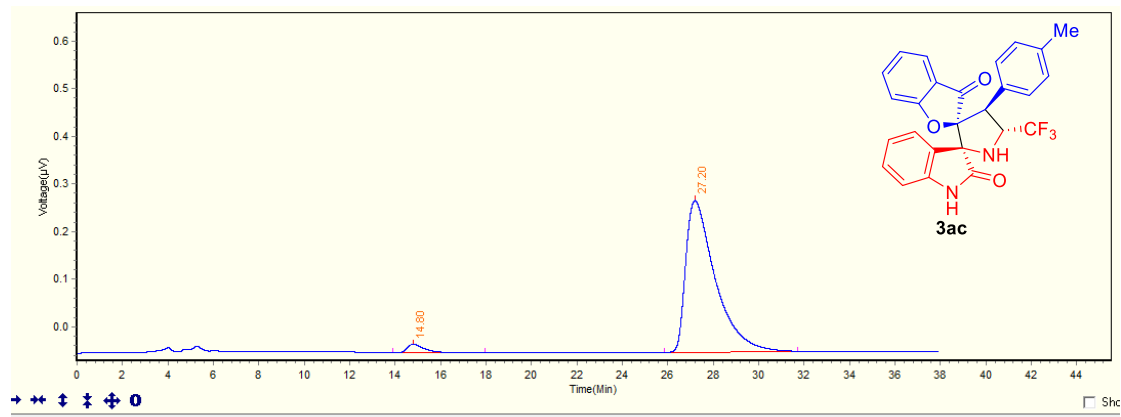

| Integration Result |                | Calculation Result |             | TimeTable    |            |           |
|--------------------|----------------|--------------------|-------------|--------------|------------|-----------|
| No.                | Retention Time | Peak Area          | Peak Height | Peak Area(%) | Peak Width | Peak Type |
| 1                  | 14.80          | 422960             | 8918        | 2.86%        | 4.06       | BB        |
| 2                  | 27.20          | 14386644           | 159110      | 97.14%       | 5.865      | BB        |
| Total              |                | 14,809,604         | 168,028     | 100.00%      |            |           |



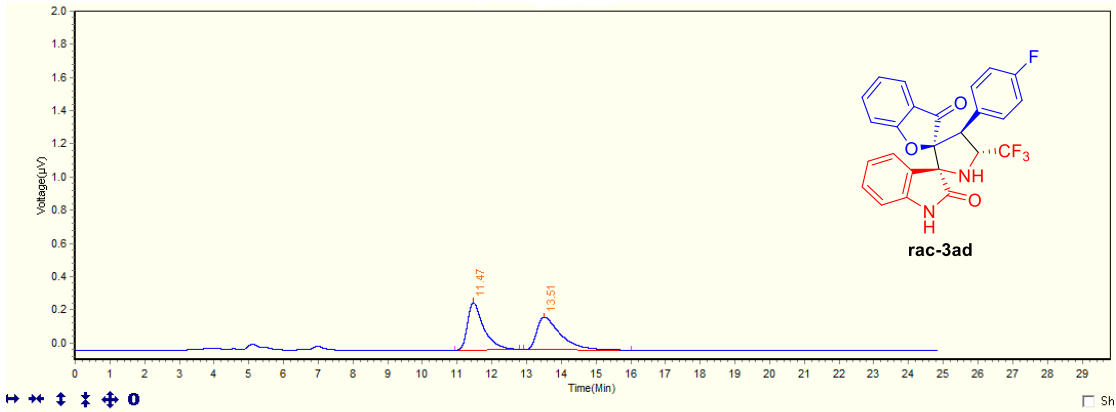

| No.   | Retention Time | Peak Area | Peak Height | Peak Area(%) | Peak Width | Peak Type |
|-------|----------------|-----------|-------------|--------------|------------|-----------|
| 1     | 11.47          | 4621110   | 142698      | 50.19%       | 1.872      | BB        |
| 2     | 13.51          | 4586114   | 97646       | 49.81%       | 3.103      | BB        |
| Total |                | 9,207,224 | 240,344     | 100.00%      |            |           |

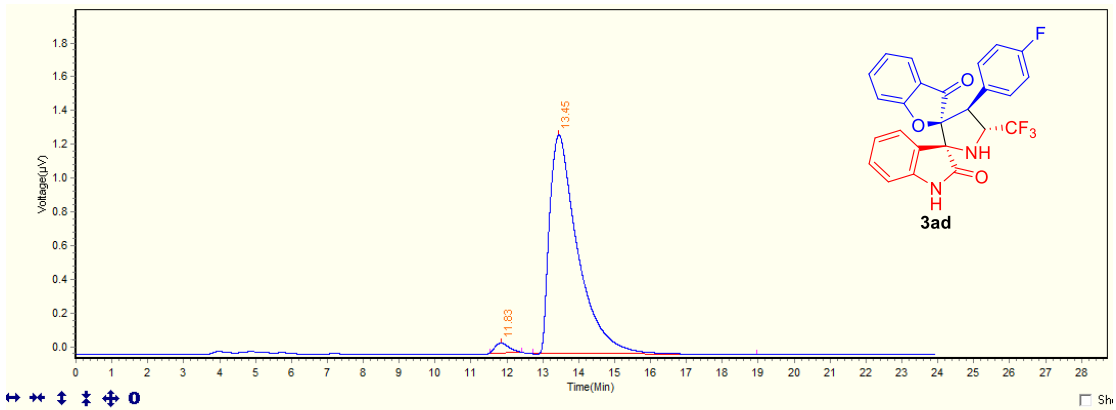

| No.   | Retention Time | Peak Area  | Peak Height | Peak Area(%) | Peak Width | Peak Type |
|-------|----------------|------------|-------------|--------------|------------|-----------|
| 1     | 11.83          | 749337     | 28128       | 2.07%        | 0.886      | BB        |
| 2     | 13.45          | 35401129   | 649634      | 97.93%       | 6.23       | BB        |
| Total |                | 36,150,466 | 677,762     | 100.00%      |            |           |

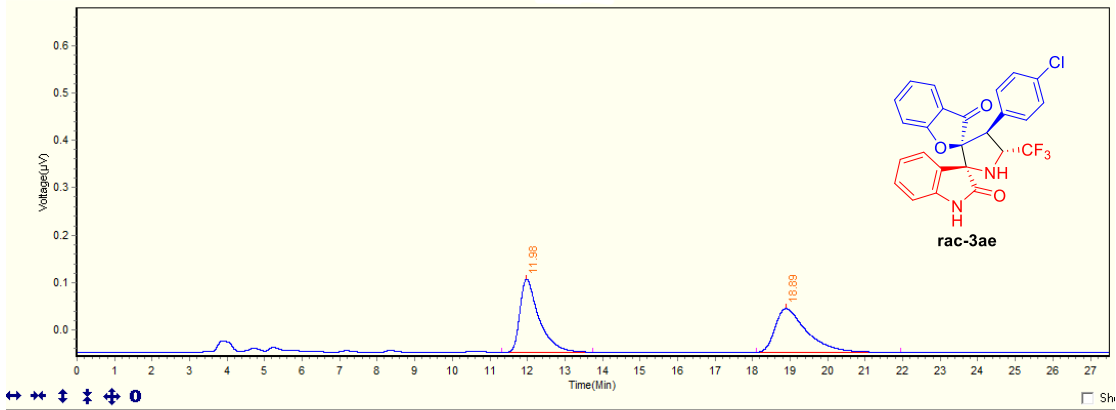

| No.   | Retention Time | Peak Area | Peak Height | Peak Area(%) | Peak Width | Peak Type |
|-------|----------------|-----------|-------------|--------------|------------|-----------|
| 1     | 11.98          | 2731344   | 77483       | 50.11%       | 2.426      | BB        |
| 2     | 18.89          | 2718971   | 46225       | 49.89%       | 3.843      | BB        |
| Total |                | 5,450,315 | 123,708     | 100.00%      |            |           |

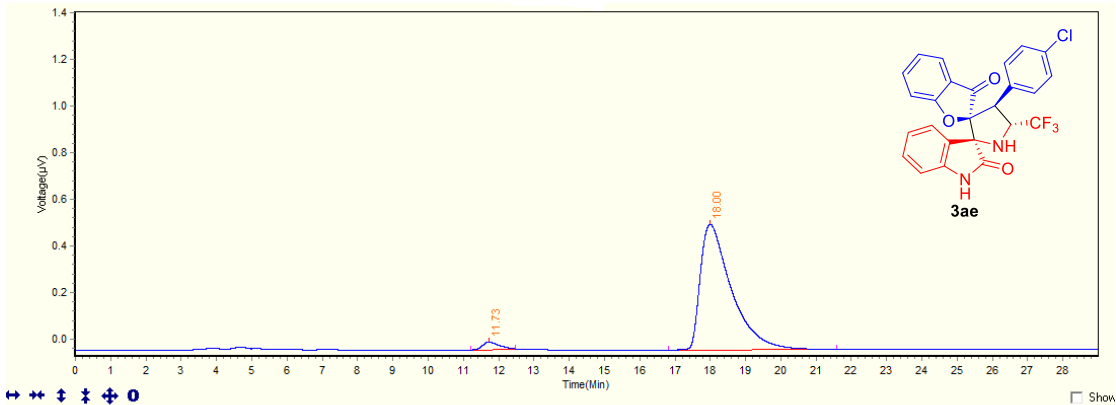

| No.   | Retention Time | Peak Area  | Peak Height | Peak Area(%) | Peak Width | Peak Type |
|-------|----------------|------------|-------------|--------------|------------|-----------|
| 1     | 11.73          | 500945     | 15859       | 2.96%        | 1.265      | BB        |
| 2     | 18.00          | 16404616   | 268692      | 97.04%       | 4.771      | BB        |
| Total |                | 16,905,561 | 284,551     | 100.00%      |            |           |

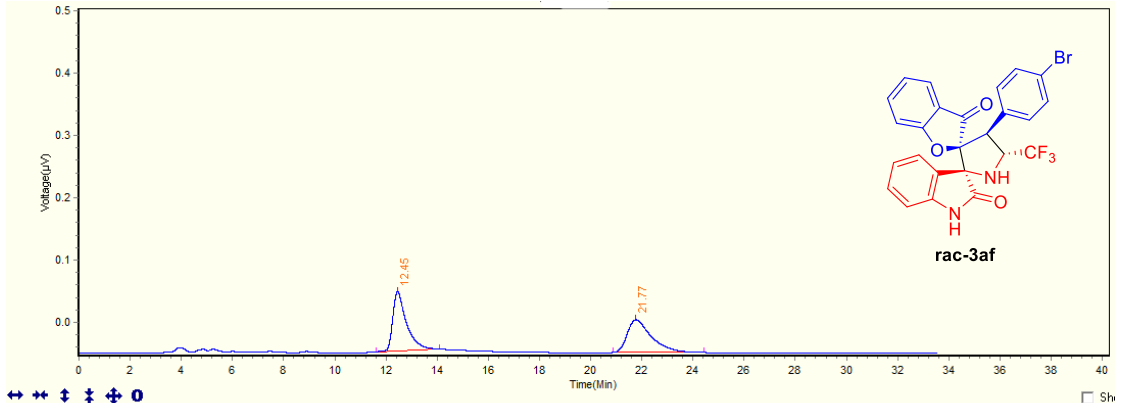

| No.   | Retention Time | PeakArea  | Peak Height | PeakArea(%) | Peak Width | Peak Type |
|-------|----------------|-----------|-------------|-------------|------------|-----------|
| 1     | 12.45          | 1764057   | 47327       | 50.61%      | 2.459      | BB        |
| 2     | 21.77          | 1721348   | 26193       | 49.39%      | 3.548      | BB        |
| Total |                | 3,485,405 | 73,520      | 100.00%     |            |           |

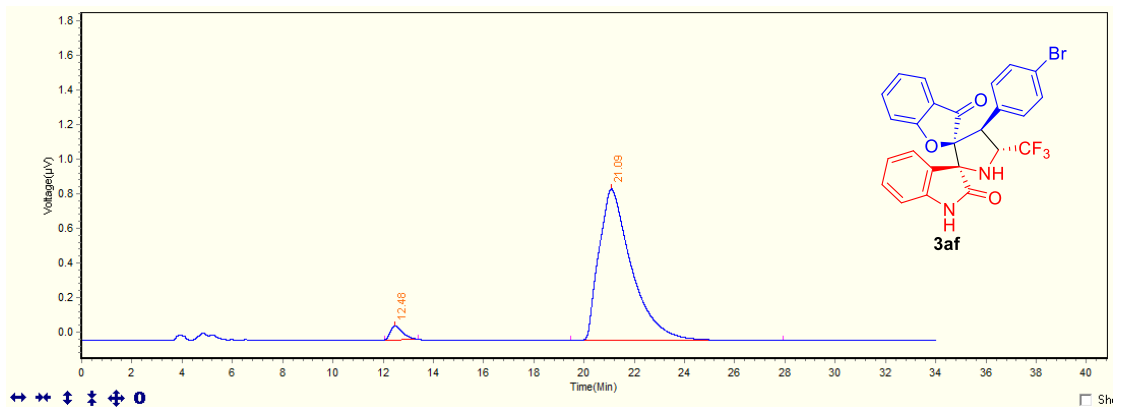

| No.   | Retention Time | PeakArea   | Peak Height | PeakArea(%) | Peak Width | Peak Type |
|-------|----------------|------------|-------------|-------------|------------|-----------|
| 1     | 12.48          | 1334165    | 39618       | 3.26%       | 1.349      | BB        |
| 2     | 21.09          | 39601014   | 438361      | 96.74%      | 8.459      | BB        |
| Total |                | 40,935,179 | 477,979     | 100.00%     |            |           |

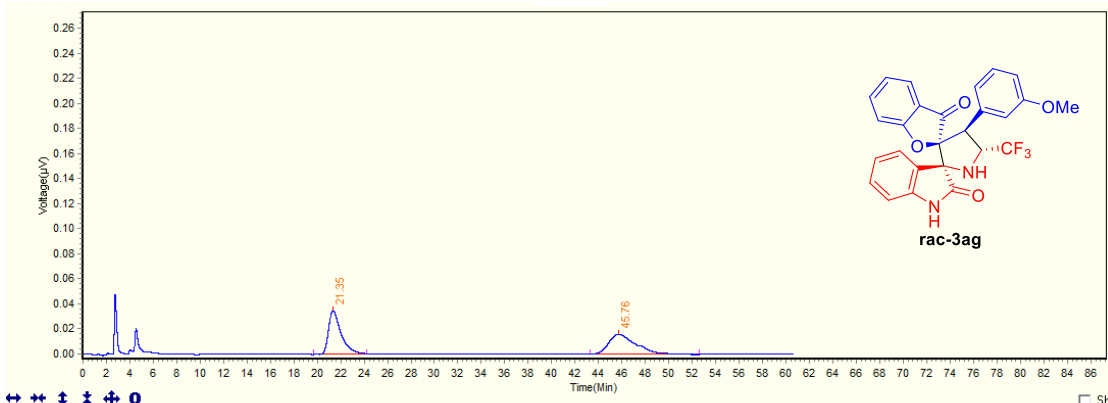

| No.   | Retention Time | Peak Area | Peak Height | Peak Area(%) | Peak Width | Peak Type |
|-------|----------------|-----------|-------------|--------------|------------|-----------|
| 1     | 21.35          | 1265524   | 17303       | 49.80%       | 4.528      | BB        |
| 2     | 45.76          | 1275886   | 7874        | 50.20%       | 9.318      | BB        |
| Total |                | 2,541,410 | 25,177      | 100.00%      |            |           |

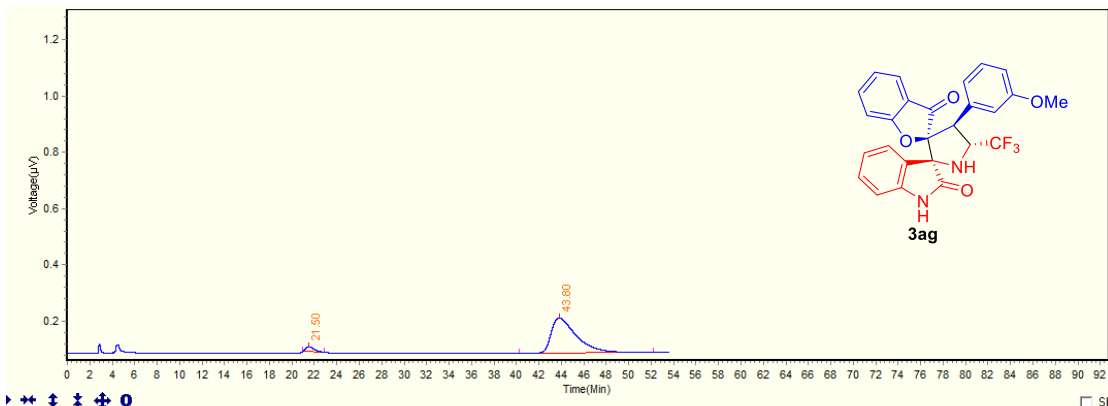

| No.   | Retention Time | Peak Area  | Peak Height | Peak Area(%) | Peak Width | Peak Type |
|-------|----------------|------------|-------------|--------------|------------|-----------|
| 1     | 21.50          | 503408     | 9303        | 4.93%        | 1.929      | BB        |
| 2     | 43.80          | 9702445    | 62277       | 95.07%       | 11.944     | BB        |
| total |                | 10,205,853 | 71,580      | 100.00%      |            |           |

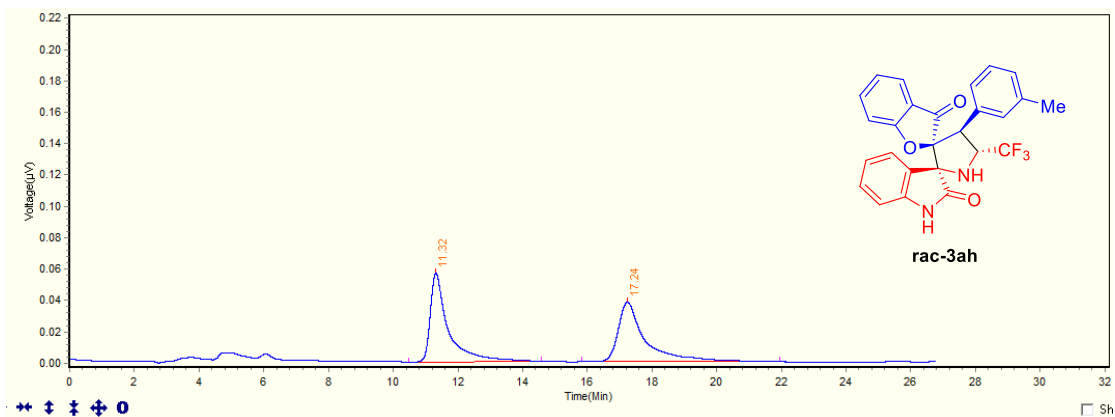

| No.   | Retention Time | Peak Area | Peak Height | Peak Area(%) | Peak Width | Peak Type |
|-------|----------------|-----------|-------------|--------------|------------|-----------|
| 1     | 11.32          | 1087587   | 28148       | 49.59%       | 4.101 BB   |           |
| 2     | 17.24          | 1105736   | 18885       | 50.41%       | 6.12 BB    |           |
| Total |                | 2,193,323 | 47,033      | 100.00%      |            |           |

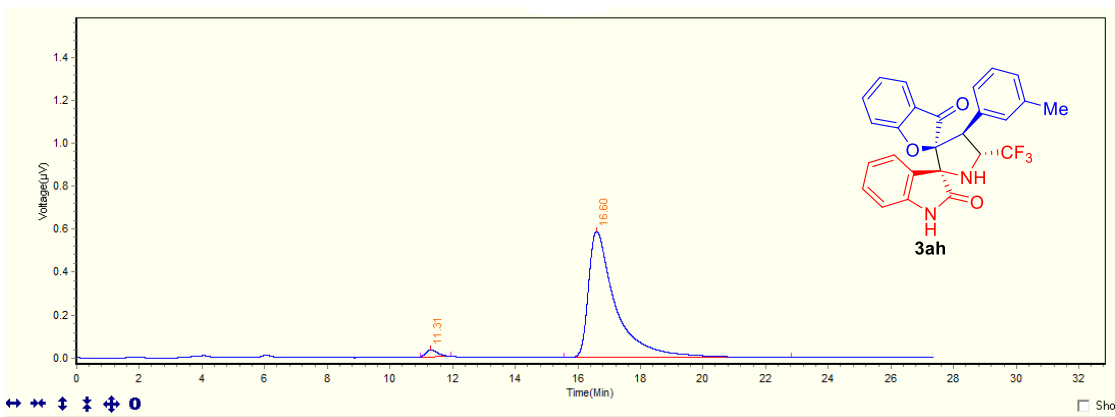

| No.   | Retention Time | Peak Area  | Peak Height | Peak Area(%) | Peak Width | Peak Type |
|-------|----------------|------------|-------------|--------------|------------|-----------|
| 1     | 11.31          | 420480     | 15916       | 2.31%        | 0.977 BB   |           |
| 2     | 16.60          | 17777717   | 293820      | 97.69%       | 7.259 BB   |           |
| Total |                | 18,198,197 | 309,736     | 100.00%      |            |           |

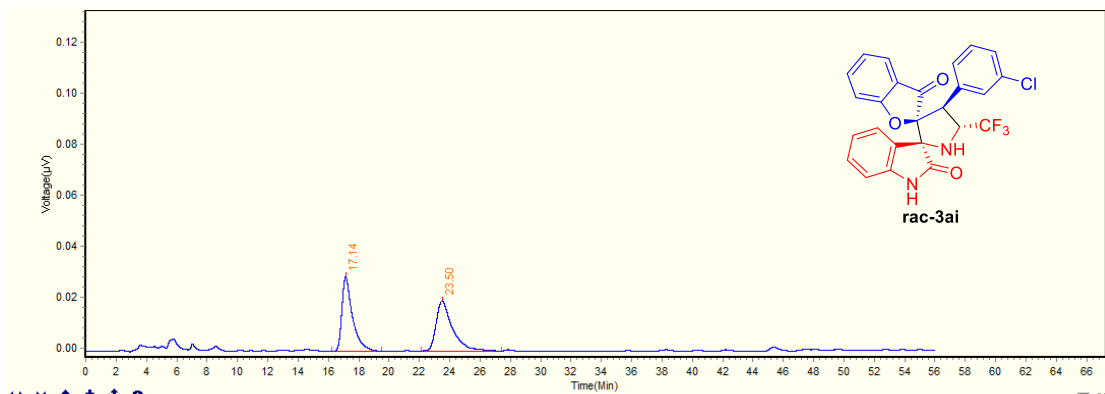

| No.   | Retention Time | Peak Area | Peak Height | Peak Area(%) | Peak Width | Peak Type |
|-------|----------------|-----------|-------------|--------------|------------|-----------|
| 1     | 17.14          | 704126    | 14546       | 49.17%       | 3.296      | BB        |
| 2     | 23.50          | 727951    | 9820        | 50.83%       | 5.296      | BB        |
| Total |                | 1,432,077 | 24,366      | 100.00%      |            |           |

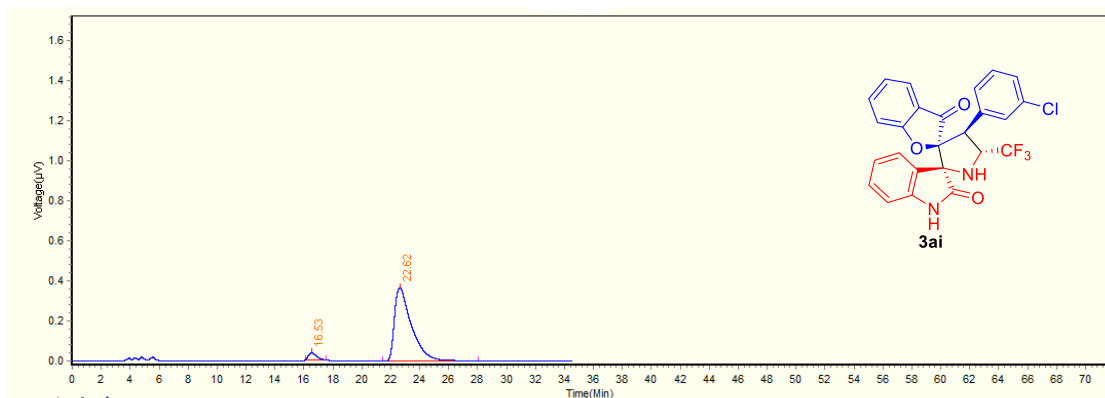

| No.   | Retention Time | Peak Area  | Peak Height | Peak Area(%) | Peak Width | Peak Type |
|-------|----------------|------------|-------------|--------------|------------|-----------|
| 1     | 16.53          | 683844     | 17537       | 4.39%        | 1.42       | BB        |
| 2     | 22.62          | 14903947   | 183459      | 95.61%       | 6.603      | BB        |
| Total |                | 15,587,791 | 200,996     | 100.00%      |            |           |

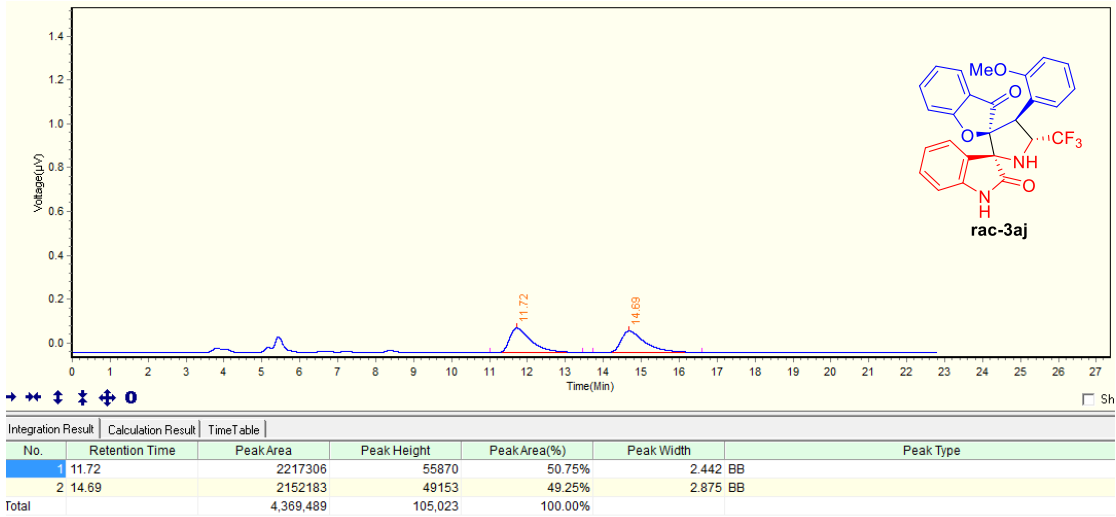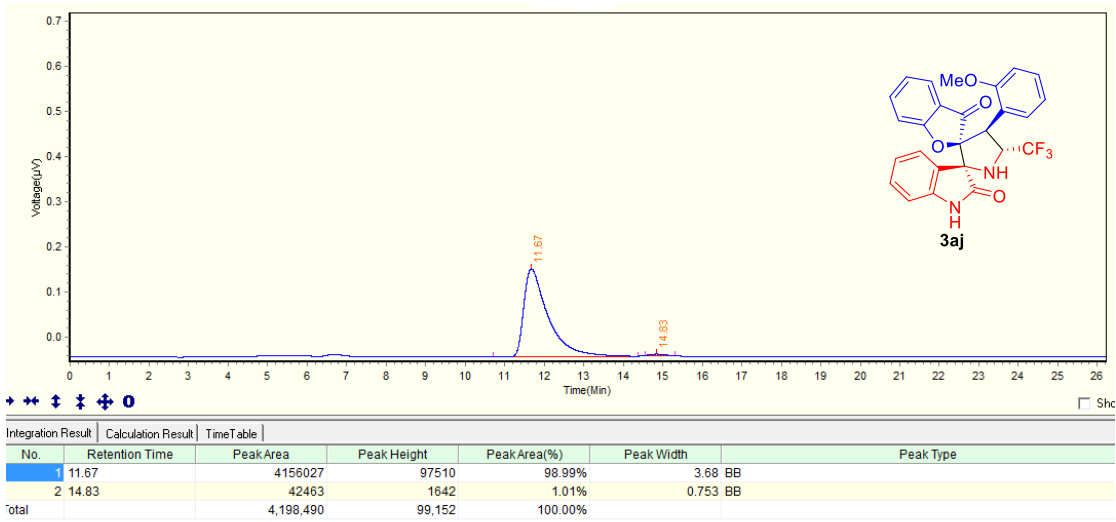

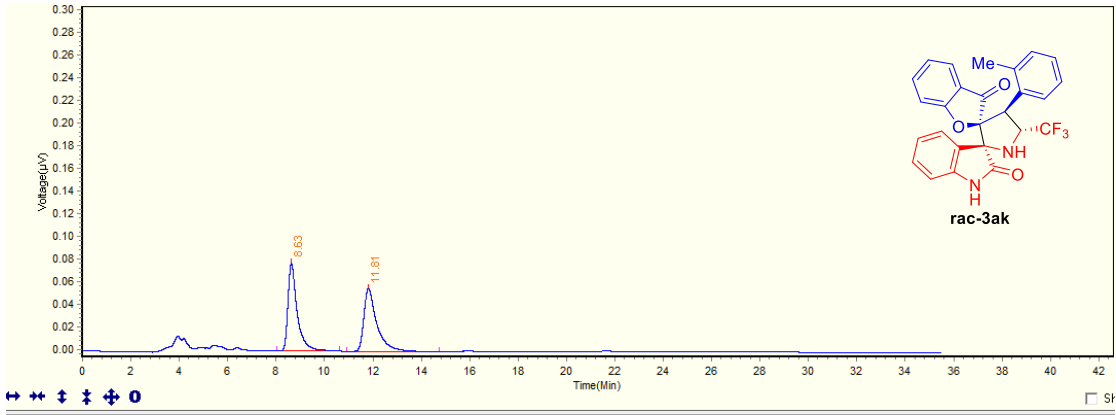

| No.   | Retention Time | Peak Area | Peak Height | Peak Area(%) | Peak Width | Peak Type |
|-------|----------------|-----------|-------------|--------------|------------|-----------|
| 1     | 8.63           | 1028969   | 38571       | 49.94%       | 2.591      | BB        |
| 2     | 11.81          | 1031303   | 27697       | 50.06%       | 3.823      | BB        |
| Total |                | 2,060,272 | 66,268      | 100.00%      |            |           |

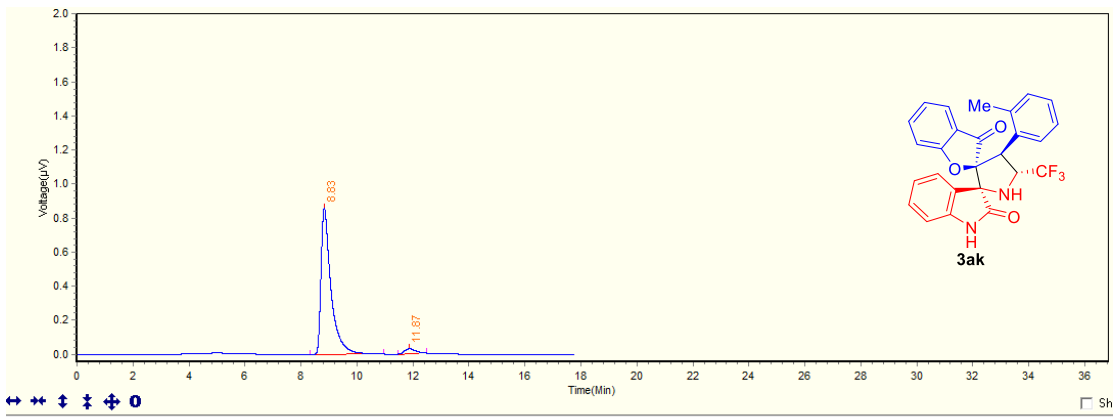

| No.   | Retention Time | Peak Area  | Peak Height | Peak Area(%) | Peak Width | Peak Type |
|-------|----------------|------------|-------------|--------------|------------|-----------|
| 1     | 8.83           | 10610797   | 429251      | 96.42%       | 2.629      | BB        |
| 2     | 11.87          | 393595     | 14676       | 3.58%        | 1.023      | BB        |
| Total |                | 11,004,392 | 443,927     | 100.00%      |            |           |



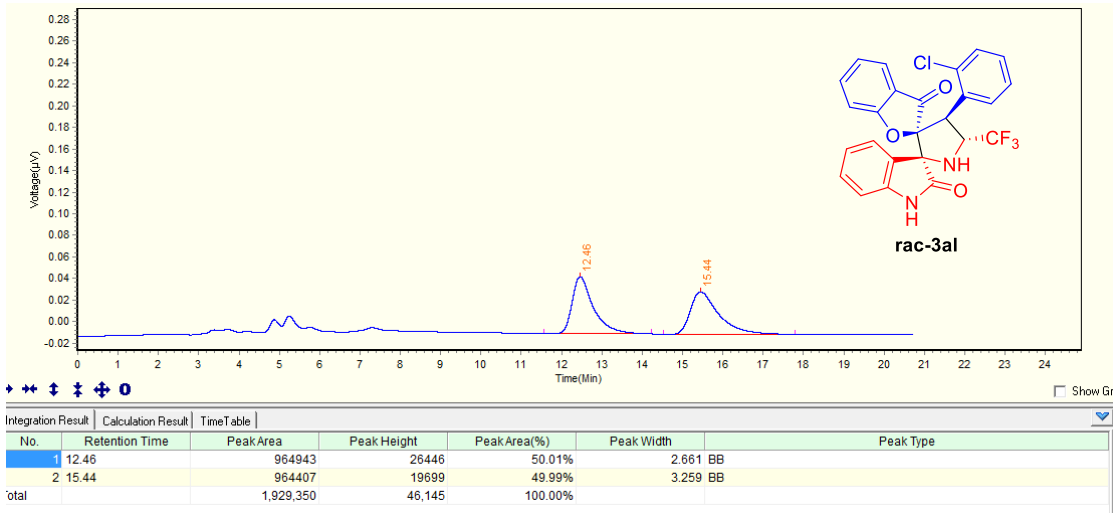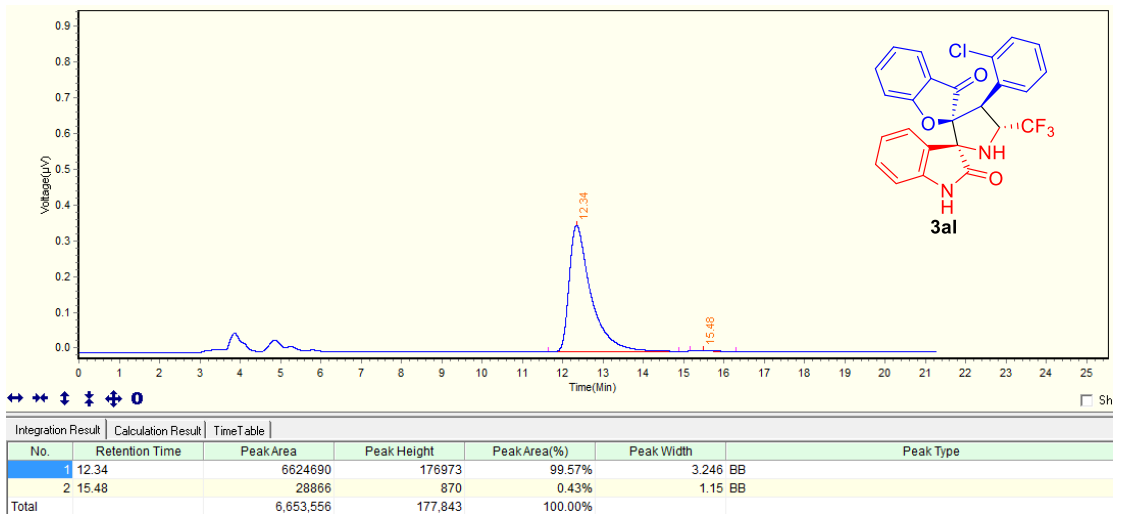

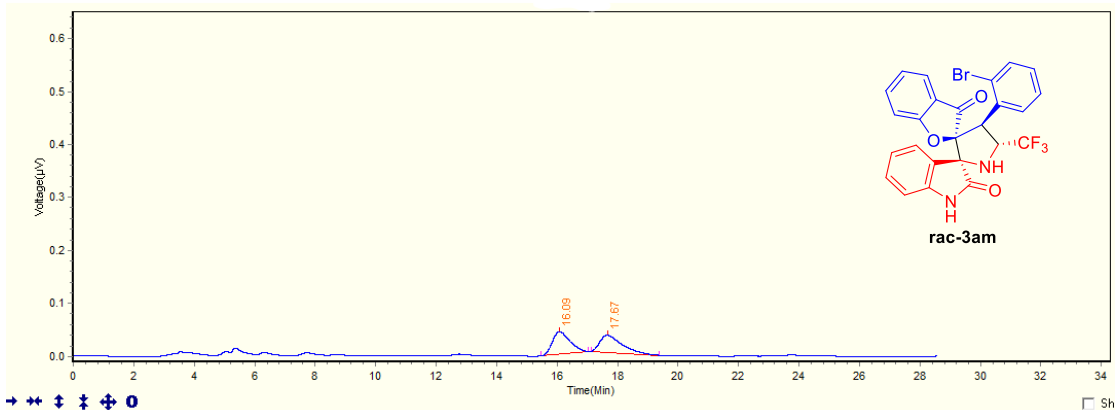

| No.   | Retention Time | PeakArea  | Peak Height | PeakArea(%) | Peak Width | Peak Type |
|-------|----------------|-----------|-------------|-------------|------------|-----------|
| 1     | 16.09          | 860949    | 21445       | 51.30%      | 1.563      | BB        |
| 2     | 17.67          | 817347    | 16106       | 48.70%      | 2.243      | BB        |
| Total |                | 1,678,296 | 37,551      | 100.00%     |            |           |

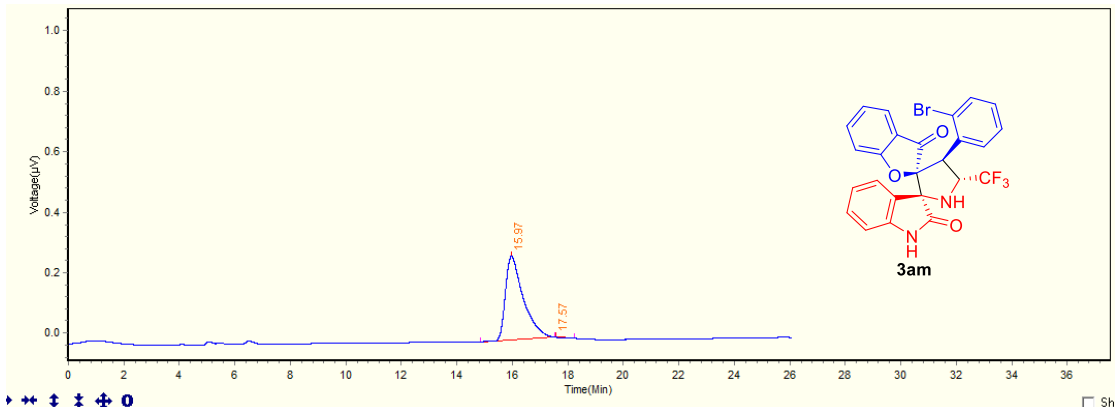

| No.   | Retention Time | PeakArea  | Peak Height | PeakArea(%) | Peak Width | Peak Type |
|-------|----------------|-----------|-------------|-------------|------------|-----------|
| 1     | 15.97          | 6152587   | 137980      | 99.86%      | 2.688      | BB        |
| 2     | 17.57          | 8709      | -2          | 0.14%       | 0.668      | BB        |
| total |                | 6,161,296 | 137,978     | 100.00%     |            |           |

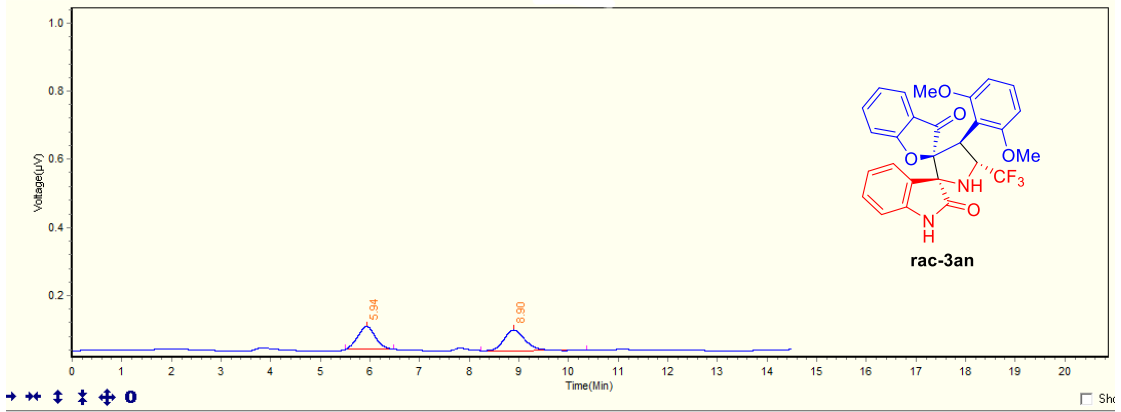

| No.   | Retention Time | Peak Area | Peak Height | Peak Area(%) | Peak Width | Peak Type |
|-------|----------------|-----------|-------------|--------------|------------|-----------|
| 1     | 5.94           | 821094    | 33632       | 48.79%       | 0.972      | BB        |
| 2     | 8.90           | 861825    | 30016       | 51.21%       | 2.131      | BB        |
| Total |                | 1,682,919 | 63,648      | 100.00%      |            |           |

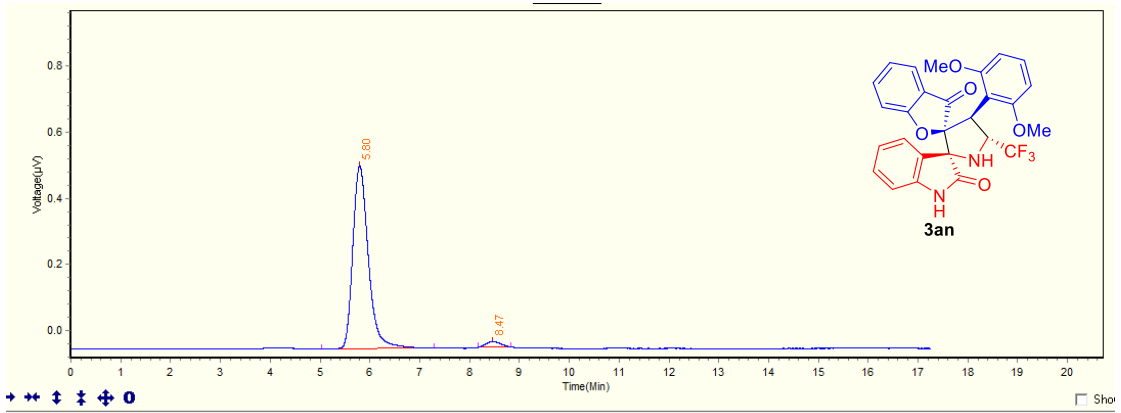

| No.   | Retention Time | Peak Area | Peak Height | Peak Area(%) | Peak Width | Peak Type |
|-------|----------------|-----------|-------------|--------------|------------|-----------|
| 1     | 5.80           | 5969847   | 275374      | 97.16%       | 2.258      | BB        |
| 2     | 8.47           | 174327    | 8106        | 2.84%        | 0.657      | BB        |
| Total |                | 6,144,174 | 283,480     | 100.00%      |            |           |

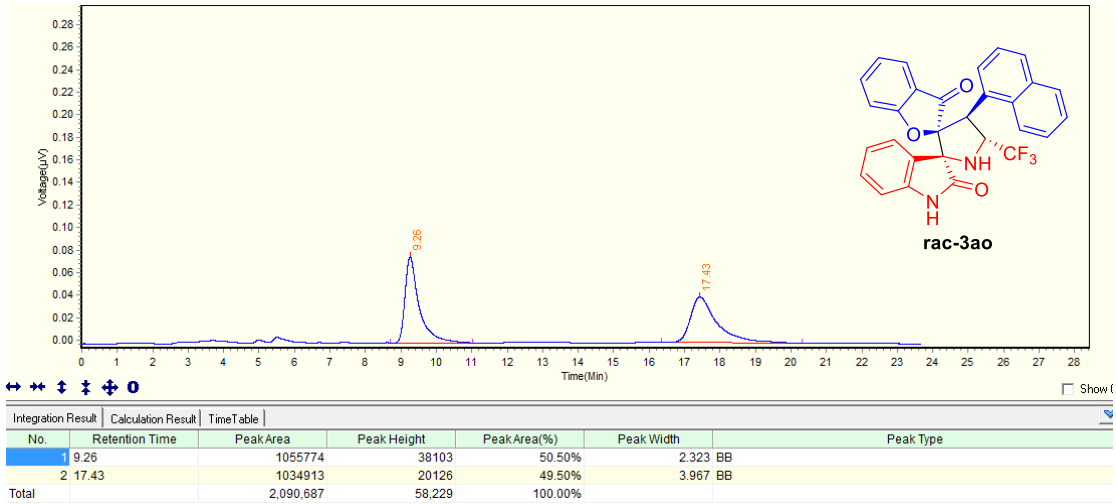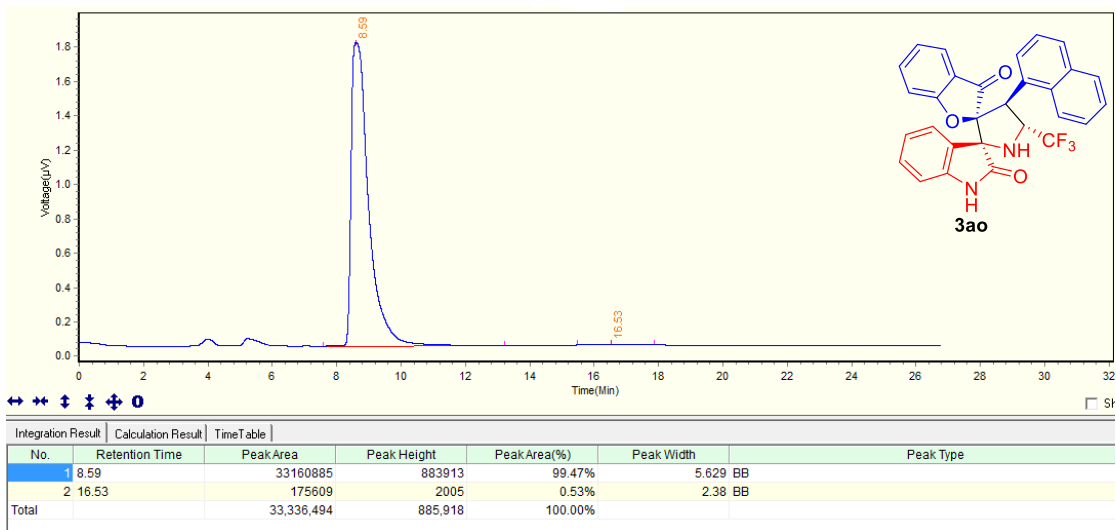

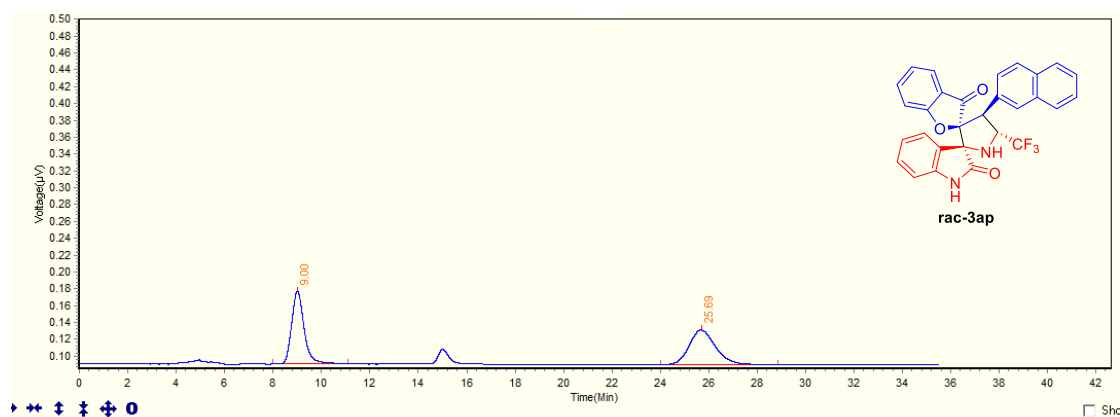

| No.   | Retention Time | PeakArea  | Peak Height | PeakArea(%) | Peak Width | Peak Type |
|-------|----------------|-----------|-------------|-------------|------------|-----------|
| 1     | 9.00           | 1549434   | 43262       | 50.12%      | 3.102 BB   |           |
| 2     | 25.69          | 1542255   | 20493       | 49.88%      | 4.843 BB   |           |
| total |                | 3,091,689 | 63,755      | 100.00%     |            |           |

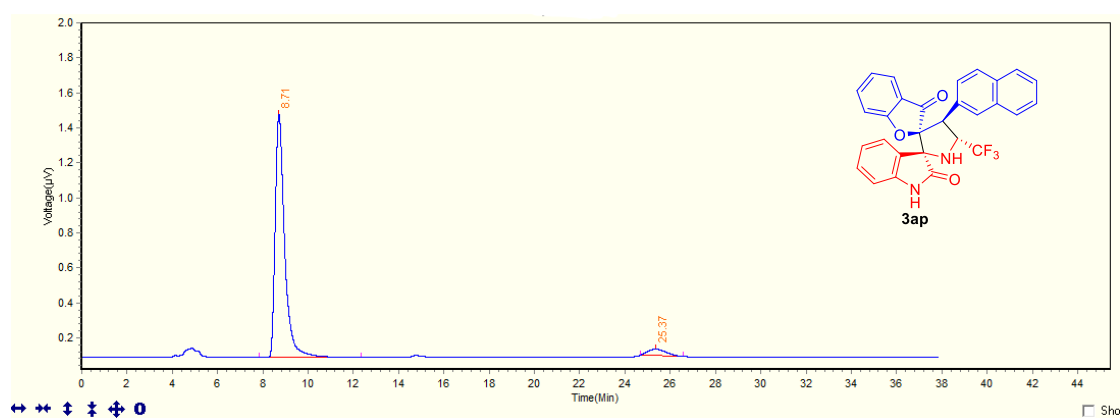

| No.   | Retention Time | PeakArea   | Peak Height | Peak Area(%) | Peak Width | Peak Type |
|-------|----------------|------------|-------------|--------------|------------|-----------|
| 1     | 8.71           | 20020734   | 692900      | 95.04%       | 4.503 BB   |           |
| 2     | 25.37          | 1045318    | 18528       | 4.96%        | 1.892 BB   |           |
| Total |                | 21,066,052 | 711,428     | 100.00%      |            |           |

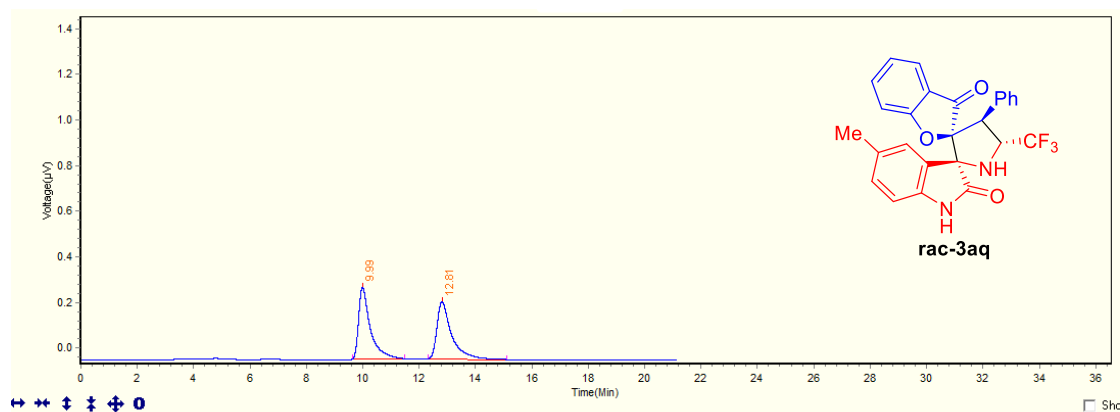

| No.   | Retention Time | Peak Area | Peak Height | Peak Area(%) | Peak Width | Peak Type |
|-------|----------------|-----------|-------------|--------------|------------|-----------|
| 1     | 9.99           | 4486388   | 157791      | 49.71%       | 1.848      | BB        |
| 2     | 12.81          | 4538976   | 125798      | 50.29%       | 2.789      | BB        |
| Total |                | 9,025,364 | 283,589     | 100.00%      |            |           |

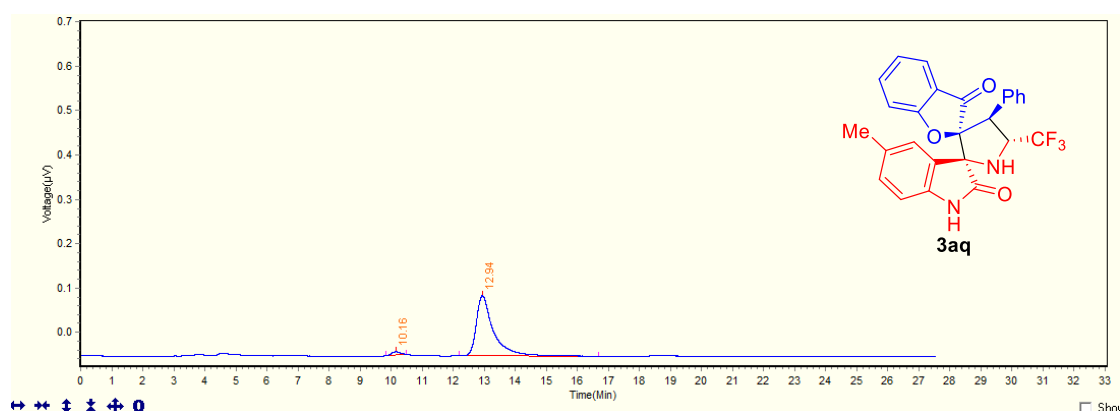

| No.   | Retention Time | Peak Area | Peak Height | Peak Area(%) | Peak Width | Peak Type |
|-------|----------------|-----------|-------------|--------------|------------|-----------|
| 1     | 10.16          | 73282     | 3616        | 2.75%        | 0.648      | BB        |
| 2     | 12.94          | 2589126   | 67772       | 97.25%       | 4.473      | BB        |
| Total |                | 2,662,408 | 71,388      | 100.00%      |            |           |

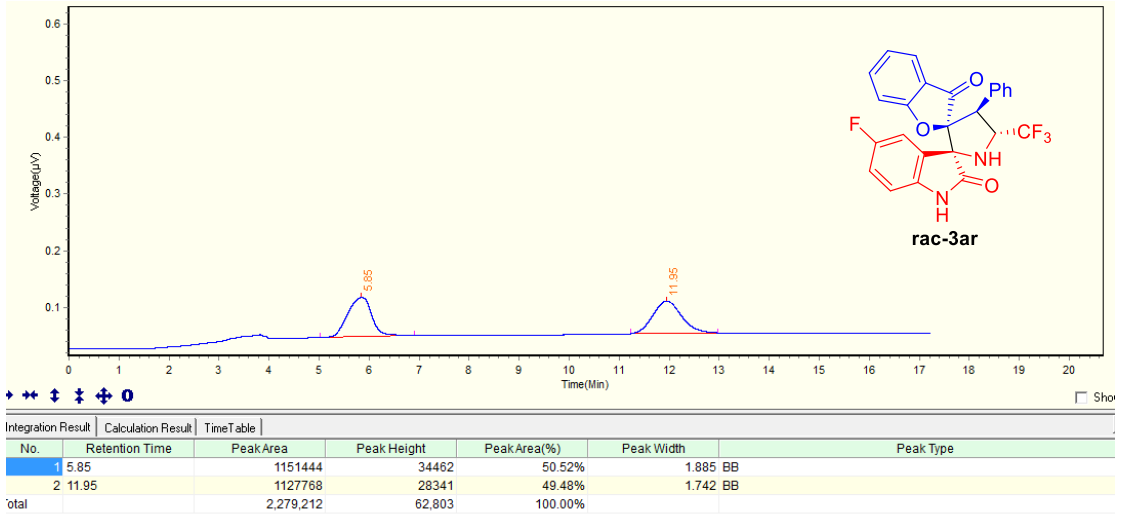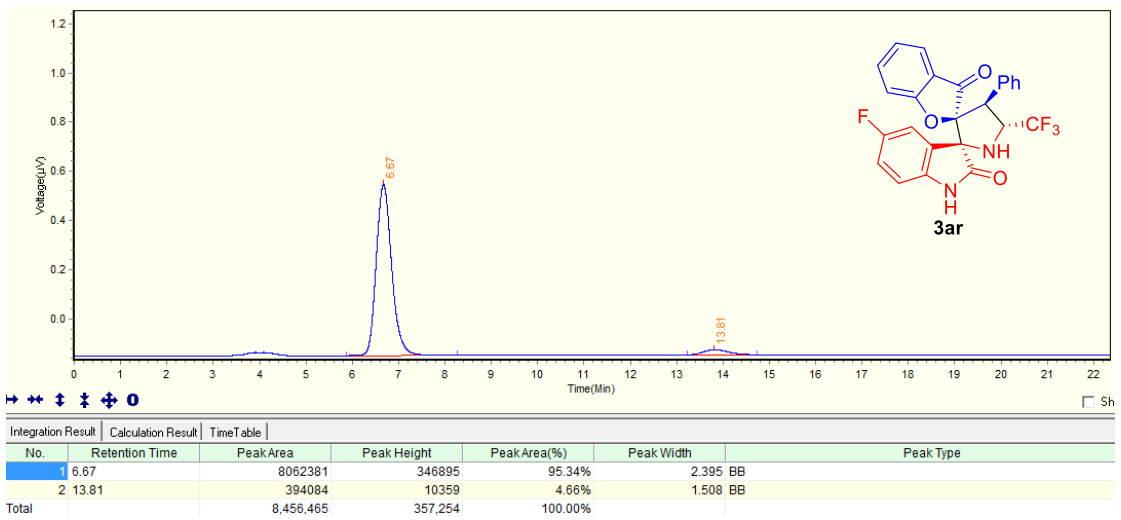

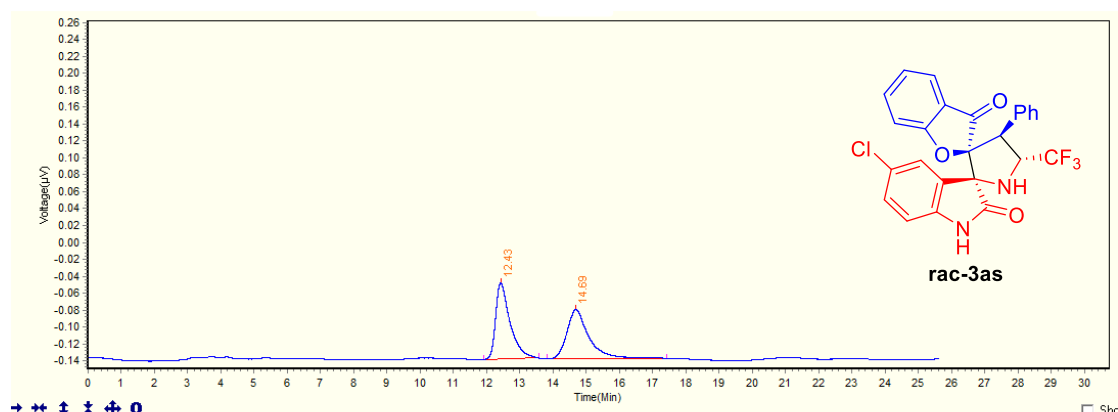

| Integration Result |                | Calculation Result |             | TimeTable    |            |           |
|--------------------|----------------|--------------------|-------------|--------------|------------|-----------|
| No.                | Retention Time | Peak Area          | Peak Height | Peak Area(%) | Peak Width | Peak Type |
| 1                  | 12.43          | 1350842            | 45048       | 49.77%       | 1.652      | BB        |
| 2                  | 14.89          | 1363138            | 29175       | 50.23%       | 3.613      | BB        |
| Total              |                | 2,713,980          | 74,223      | 100.00%      |            |           |

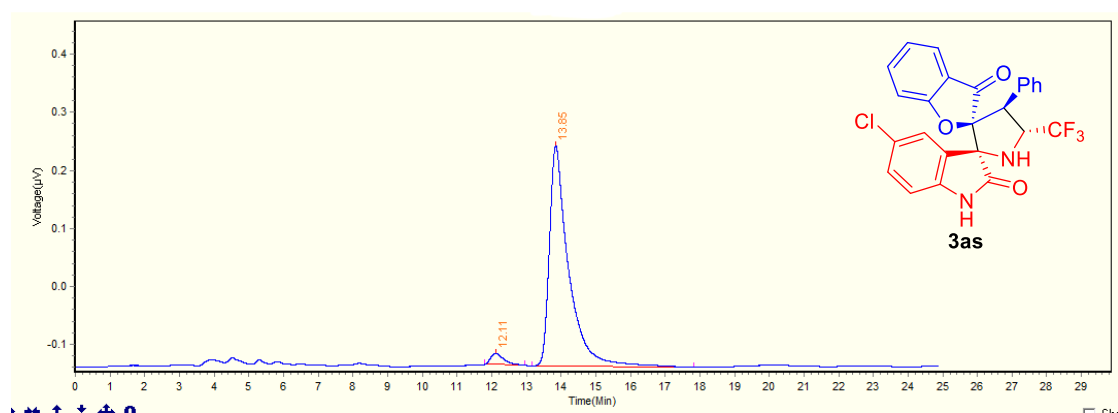

| Integration Result |                | Calculation Result |             | TimeTable    |            |           |
|--------------------|----------------|--------------------|-------------|--------------|------------|-----------|
| No.                | Retention Time | Peak Area          | Peak Height | Peak Area(%) | Peak Width | Peak Type |
| 1                  | 12.11          | 257205             | 9608        | 3.40%        | 1.136      | BB        |
| 2                  | 13.85          | 7308754            | 189928      | 96.60%       | 4.664      | BB        |
| Total              |                | 7,565,959          | 199,536     | 100.00%      |            |           |



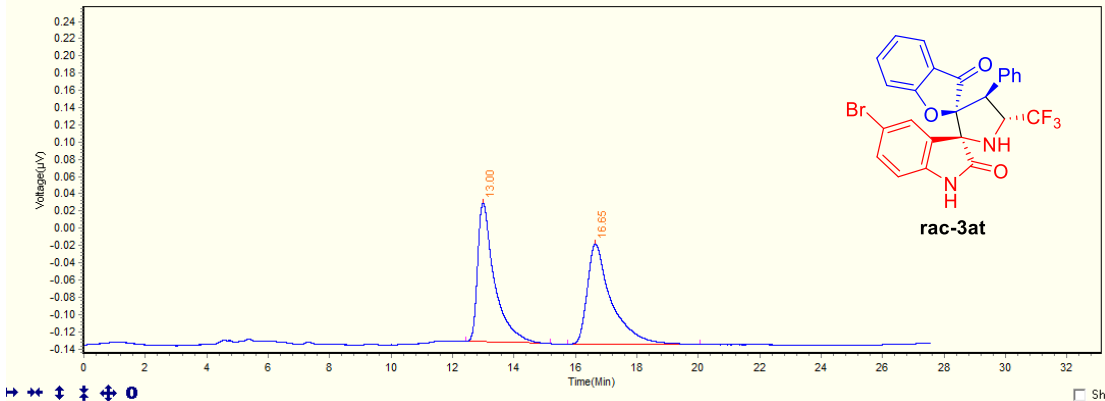

| No.   | Retention Time | Peak Area | Peak Height | Peak Area(%) | Peak Width | Peak Type |
|-------|----------------|-----------|-------------|--------------|------------|-----------|
| 1     | 13.00          | 3076660   | 80491       | 49.23%       | 2.751      | BB        |
| 2     | 16.65          | 3172462   | 58224       | 50.77%       | 4.309      | BB        |
| Total |                | 6,249,122 | 138,715     | 100.00%      |            |           |

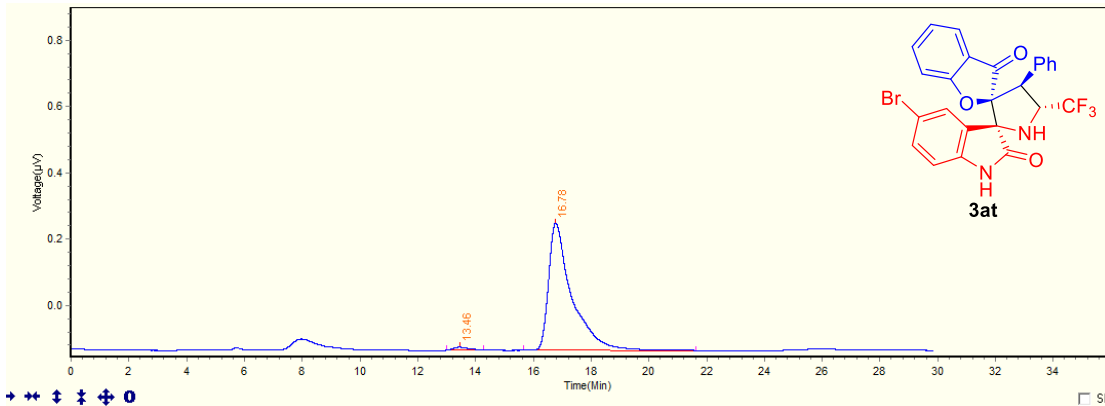

| No.   | Retention Time | Peak Area  | Peak Height | Peak Area(%) | Peak Width | Peak Type |
|-------|----------------|------------|-------------|--------------|------------|-----------|
| 1     | 13.46          | 152193     | 4311        | 1.41%        | 1.248      | BB        |
| 2     | 16.78          | 10671598   | 191794      | 98.59%       | 5.99       | BB        |
| Total |                | 10,823,791 | 196,105     | 100.00%      |            |           |

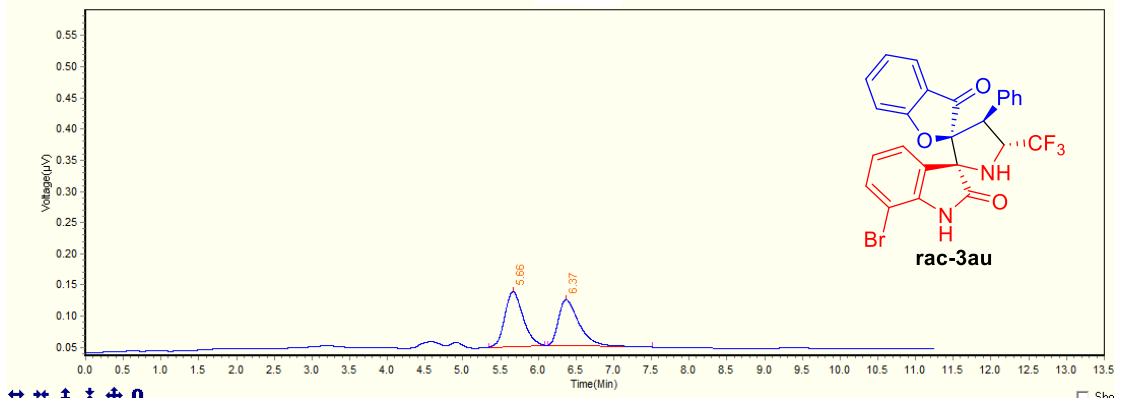

| No.   | Retention Time | Peak Area | Peak Height | Peak Area(%) | Peak Width | Peak Type |
|-------|----------------|-----------|-------------|--------------|------------|-----------|
| 1     | 5.66           | 732465    | 43799       | 51.09%       | 0.749      | BB        |
| 2     | 6.37           | 701233    | 36977       | 48.91%       | 1.387      | BB        |
| Total |                | 1,433,698 | 80,776      | 100.00%      |            |           |

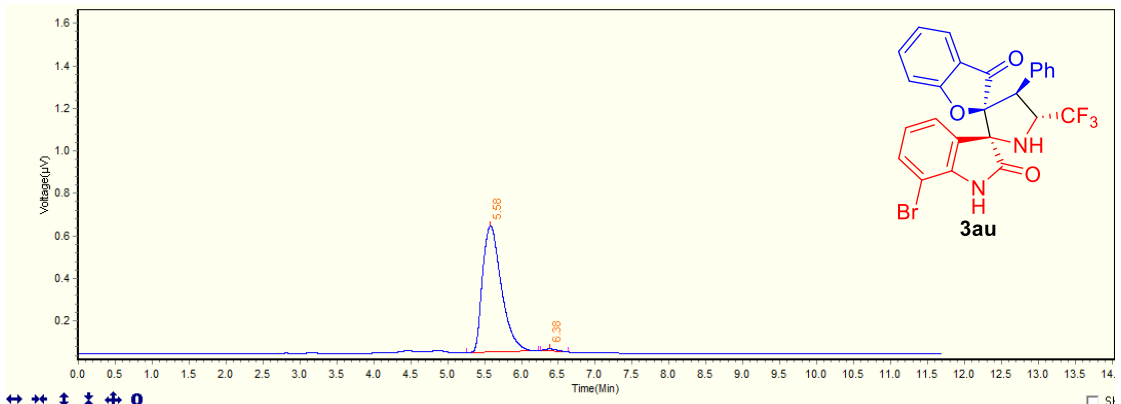

| No.   | Retention Time | Peak Area | Peak Height | Peak Area(%) | Peak Width | Peak Type |
|-------|----------------|-----------|-------------|--------------|------------|-----------|
| 1     | 5.58           | 5272558   | 298098      | 98.92%       | 0.973      | BB        |
| 2     | 6.38           | 57603     | 4744        | 1.08%        | 0.376      | BB        |
| Total |                | 5,330,061 | 302,842     | 100.00%      |            |           |

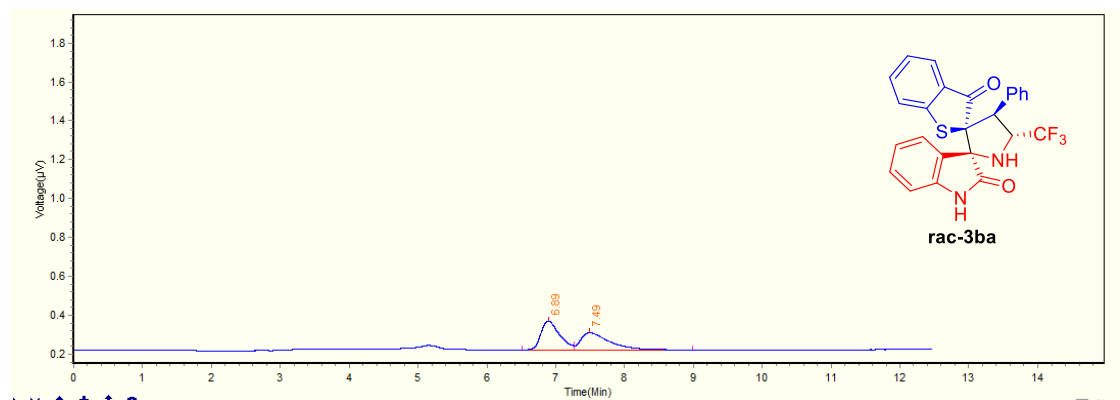

| No.   | Retention Time | PeakArea  | Peak Height | Peak Area(%) | Peak Width | Peak Type |
|-------|----------------|-----------|-------------|--------------|------------|-----------|
| 1     | 6.89           | 1379269   | 73948       | 51.79%       | 0.757 VB   |           |
| 2     | 7.49           | 1283950   | 43969       | 48.21%       | 1.719 VB   |           |
| Total |                | 2,663,219 | 117,917     | 100.00%      |            |           |

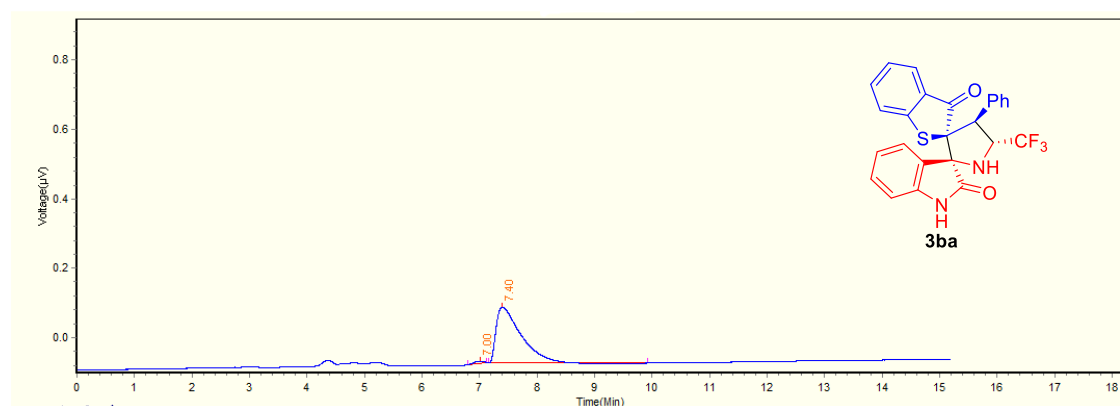

| No.   | Retention Time | PeakArea  | Peak Height | Peak Area(%) | Peak Width | Peak Type |
|-------|----------------|-----------|-------------|--------------|------------|-----------|
| 1     | 7.00           | 31350     | 2780        | 1.31%        | 0.326 BB   |           |
| 2     | 7.40           | 2366652   | 79366       | 98.69%       | 2.765 BB   |           |
| Total |                | 2,398,002 | 82,146      | 100.00%      |            |           |

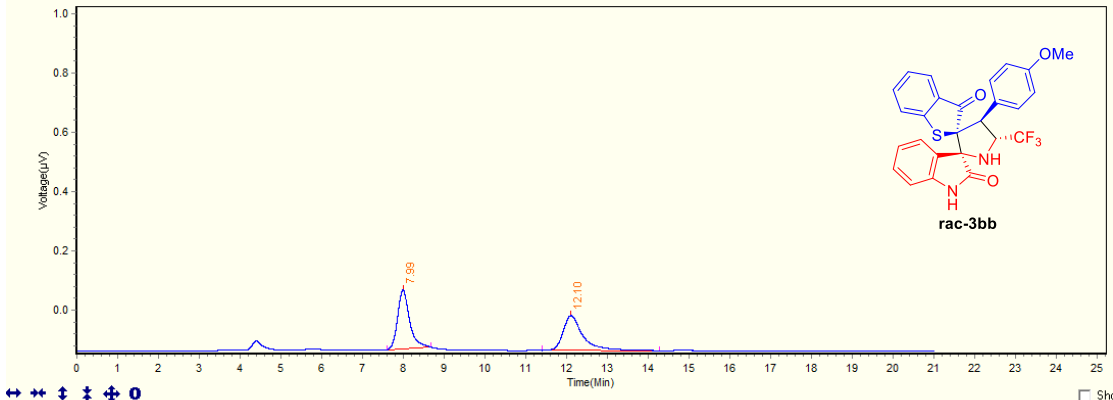

| No.   | Retention Time | Peak Area | Peak Height | Peak Area(%) | Peak Width | Peak Type |
|-------|----------------|-----------|-------------|--------------|------------|-----------|
| 1     | 7.99           | 2015166   | 99444       | 50.28%       | 1.078      | BB        |
| 2     | 12.10          | 1992853   | 58791       | 49.72%       | 2.885      | BB        |
| Total |                | 4,008,019 | 158,235     | 100.00%      |            |           |

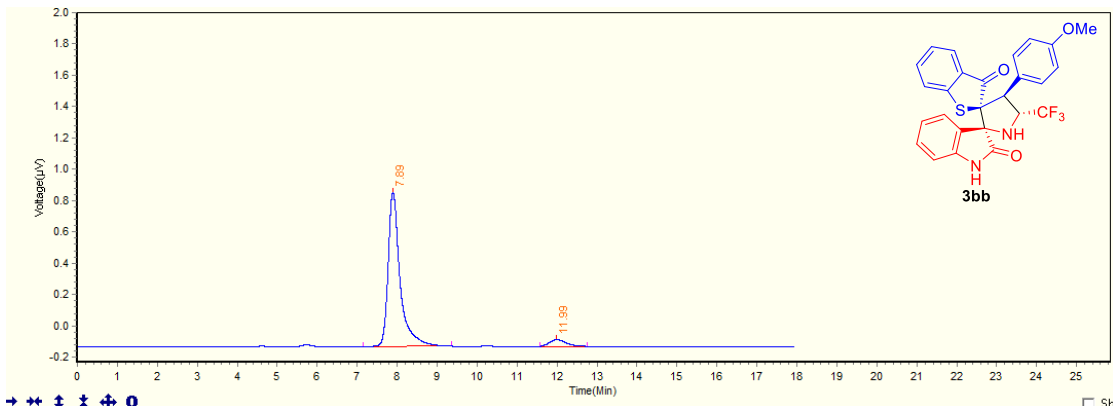

| No.   | Retention Time | Peak Area  | Peak Height | Peak Area(%) | Peak Width | Peak Type |
|-------|----------------|------------|-------------|--------------|------------|-----------|
| 1     | 7.89           | 10322129   | 490894      | 94.21%       | 2.222      | BB        |
| 2     | 11.99          | 634773     | 21934       | 5.79%        | 1.183      | BB        |
| Total |                | 10,956,902 | 512,828     | 100.00%      |            |           |

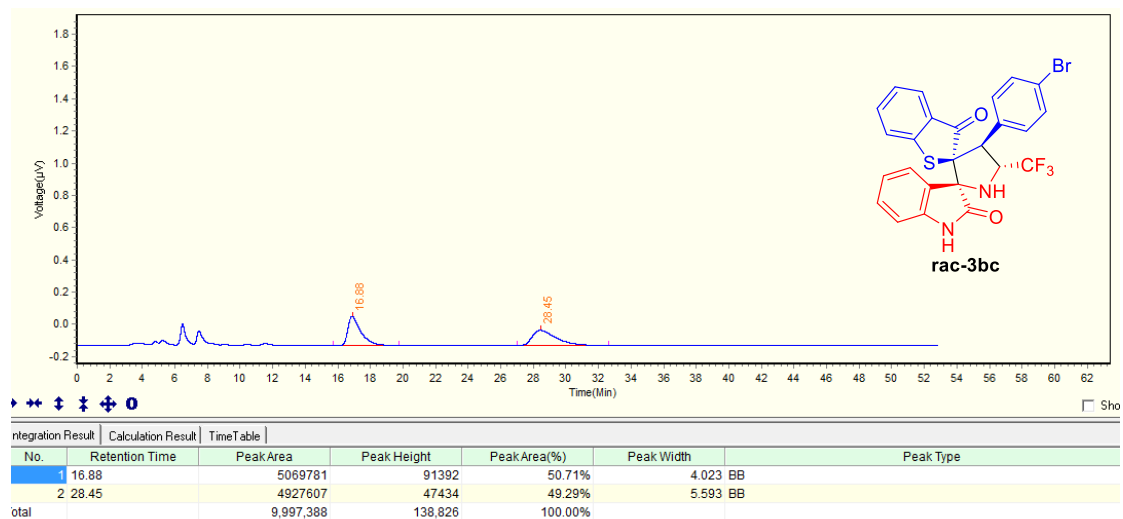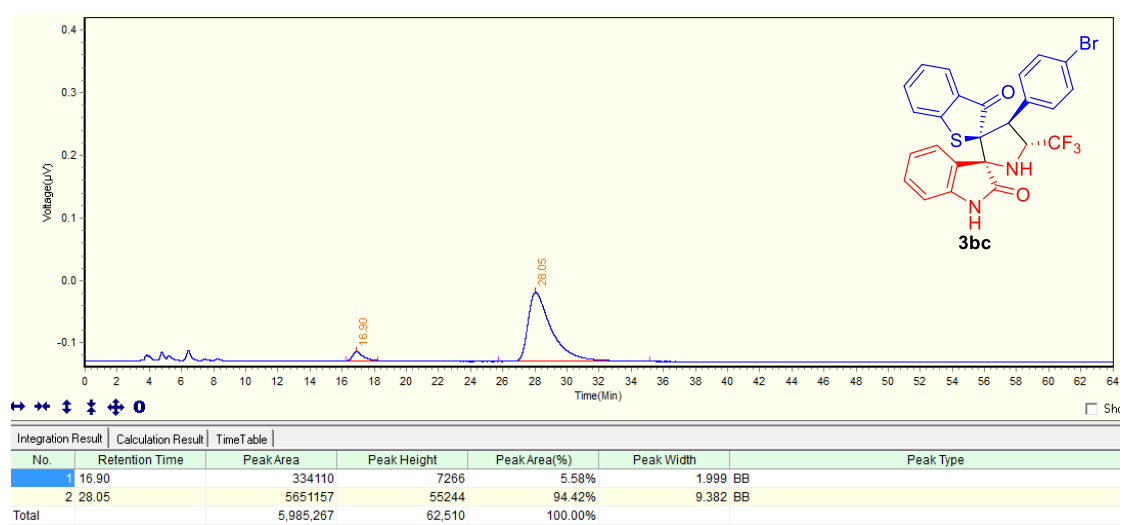

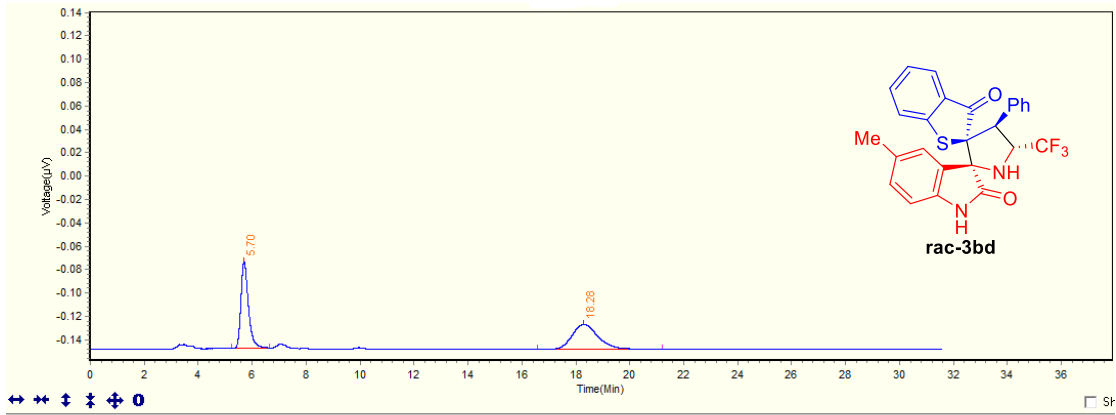

| No.   | Retention Time | Peak Area | Peak Height | Peak Area(%) | Peak Width | Peak Type |
|-------|----------------|-----------|-------------|--------------|------------|-----------|
| 1     | 5.70           | 703522    | 36760       | 49.65%       | 1.391      | BB        |
| 2     | 18.28          | 713513    | 10593       | 50.35%       | 4.647      | BB        |
| Total |                | 1,417,035 | 47,353      | 100.00%      |            |           |

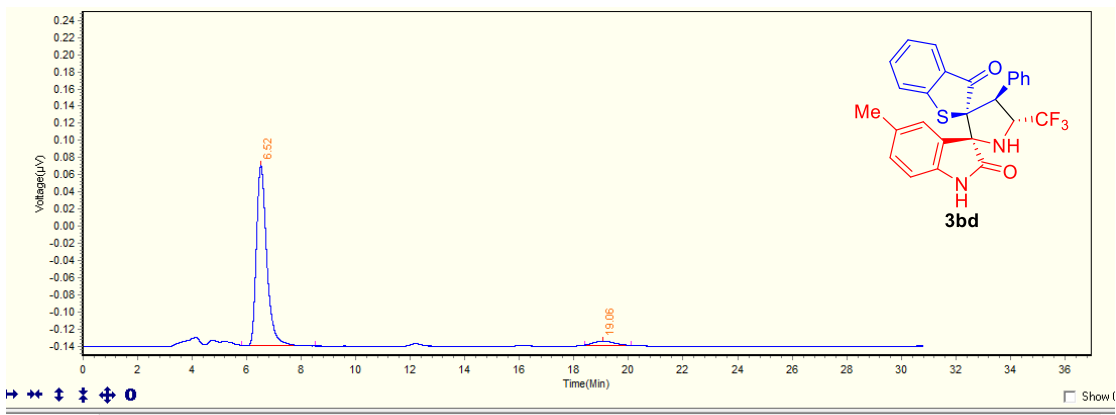

| No.   | Retention Time | Peak Area | Peak Height | Peak Area(%) | Peak Width | Peak Type |
|-------|----------------|-----------|-------------|--------------|------------|-----------|
| 1     | 6.52           | 2750831   | 104710      | 95.67%       | 2.718      | BB        |
| 2     | 19.06          | 124599    | 2402        | 4.33%        | 1.705      | BB        |
| Total |                | 2,875,430 | 107,112     | 100.00%      |            |           |

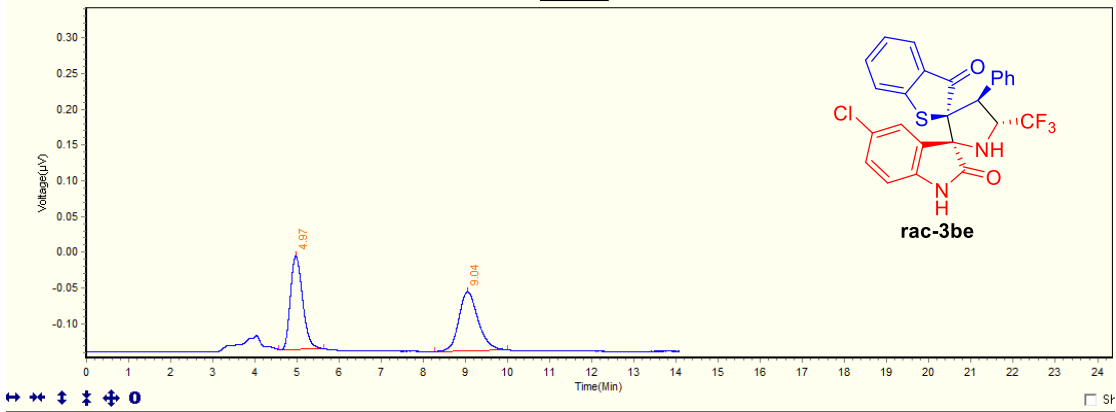

| No.   | Retention Time | Peak Area | Peak Height | Peak Area(%) | Peak Width | Peak Type |
|-------|----------------|-----------|-------------|--------------|------------|-----------|
| 1     | 4.97           | 1304529   | 64991       | 49.88%       | 1.073      | BB        |
| 2     | 9.04           | 1310767   | 41215       | 50.12%       | 1.731      | BB        |
| Total |                | 2,615,296 | 106,206     | 100.00%      |            |           |

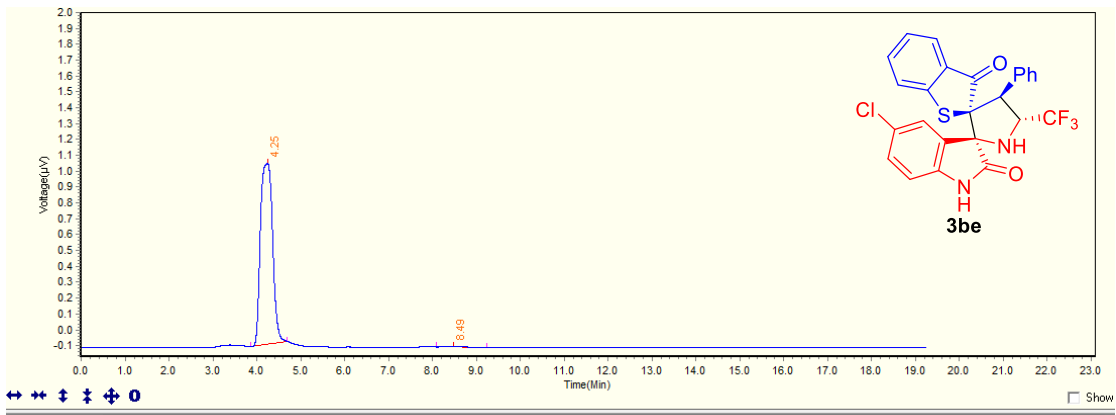

| No.   | Retention Time | Peak Area  | Peak Height | Peak Area(%) | Peak Width | Peak Type |
|-------|----------------|------------|-------------|--------------|------------|-----------|
| 1     | 4.25           | 10972180   | 571874      | 99.38%       | 0.837      | BB        |
| 2     | 8.49           | 68200      | 2943        | 0.62%        | 1.147      | BB        |
| Total |                | 11,040,380 | 574,817     | 100.00%      |            |           |

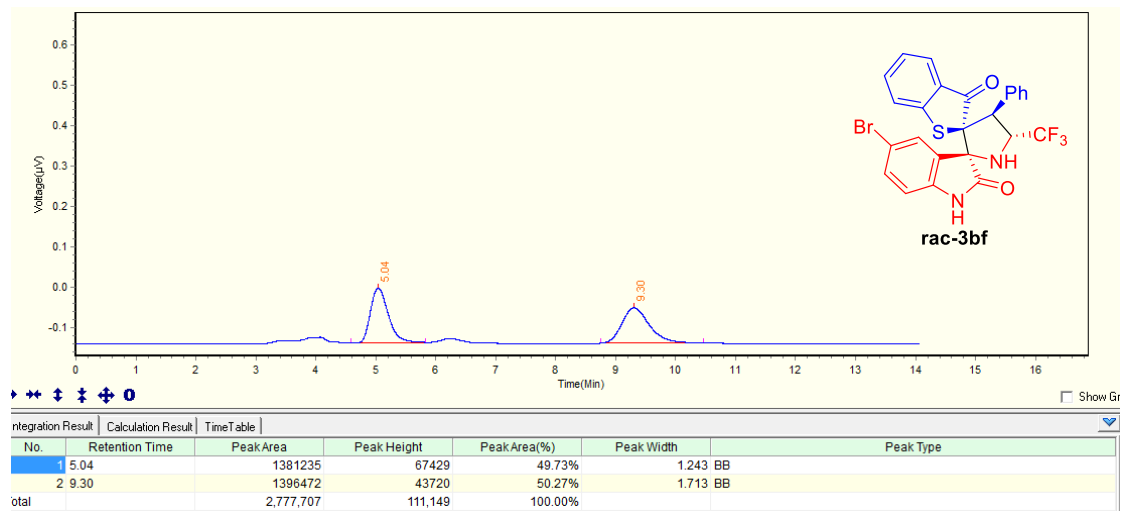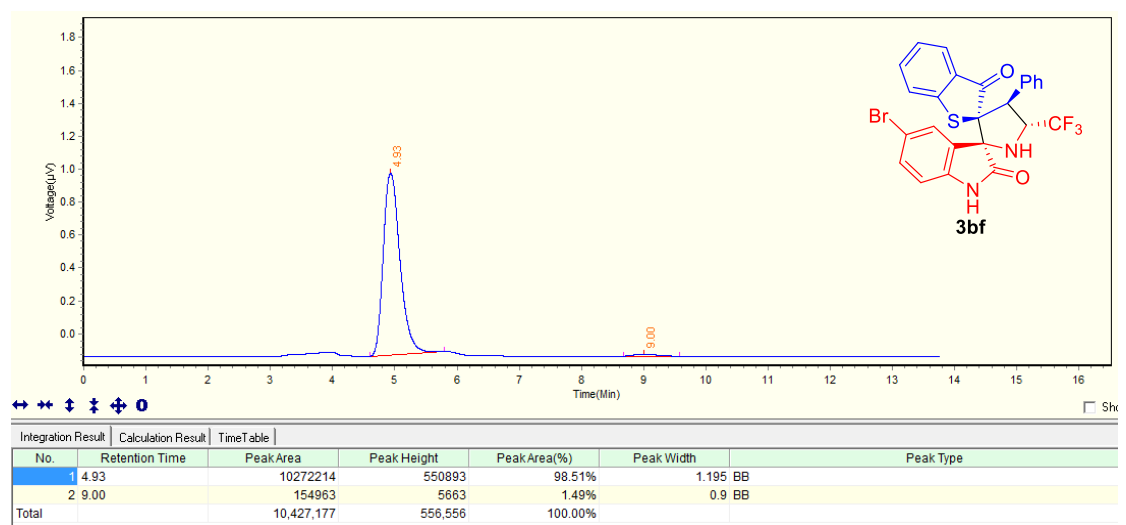



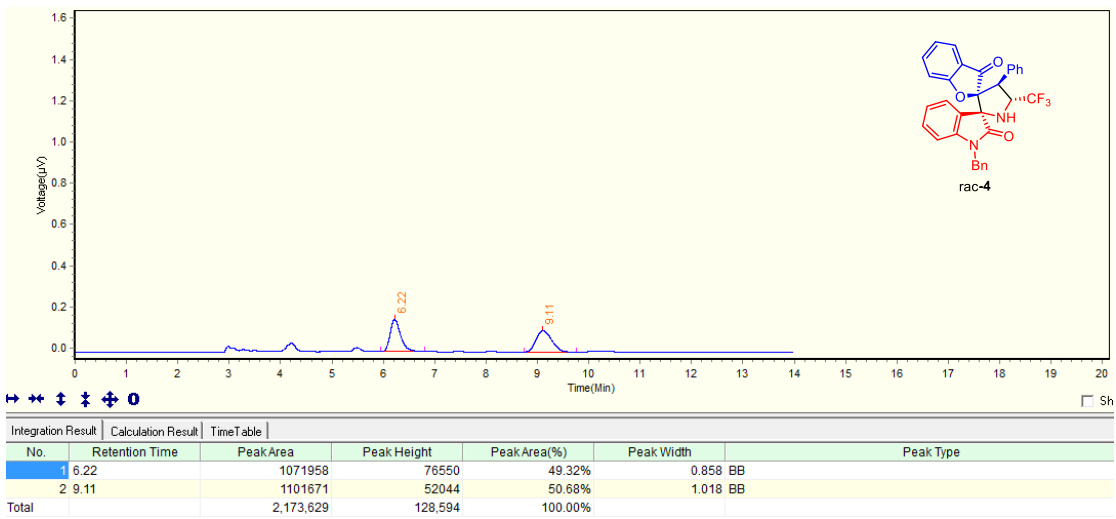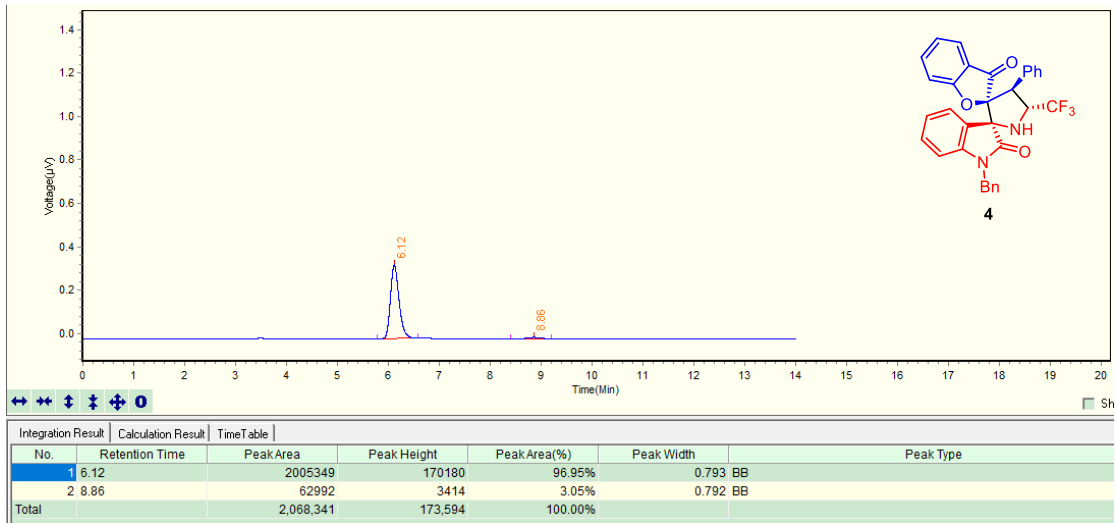

Supplement: d1ob01599k1.pdf [file d1ob01599k1.pdf]
